# Supplementary material for: Copper-catalyzed 1,6-conjugate addition of para-quinone methides with diborylmethane
Source: Royal Society of Chemistry journal article supplement (doi:10.1039/d1qo00632k), 2021-01-01

## Copper-catalyzed 1,6-conjugate addition of *para*-quinone methides with diborylmethane

Xin Li,<sup>a</sup> Guoliang Gao,<sup>a</sup> Songtao He,<sup>a</sup> and Qiuling Song<sup>\*a,b</sup>

<sup>a</sup>Institute of Next Generation Matter Transformation, College of Materials Science & Engineering, Huaqiao University, 668 Jimei Blvd, Xiamen 361021, Fujian, China.

<sup>b</sup>State Key Laboratory of Organometallic Chemistry and Key Laboratory of Organofluorine Chemistry, Shanghai Institute of Organic Chemistry, Chinese Academy of Sciences, Shanghai 200032, China.

\*qsong@hqu.edu.cn

### Supporting Information

#### Table of Contents

|                                                                            |    |
|----------------------------------------------------------------------------|----|
| I. General Information .....                                               | 1  |
| II. Preparation of Materials .....                                         | 2  |
| 2.1. Synthesis of <i>p</i> -Quinone Methide Substrates .....               | 2  |
| 2.2. Synthesis of <i>p</i> -Quinone Methide <b>1ai</b> and <b>4a</b> ..... | 2  |
| 2.3. Synthesis of <i>p</i> -Quinone Methide <b>4b</b> .....                | 2  |
| 2.4. Synthesis of Diborylmethane <b>2a</b> .....                           | 2  |
| III. Screening of Reaction Conditions .....                                | 3  |
| IV. 1,6-Conjugate Addition of Diborylmethane .....                         | 6  |
| V. Synthesis of compound <b>7</b> .....                                    | 15 |
| VI. Synthesis of compound <b>9</b> .....                                   | 15 |
| VII. NMR Spectra .....                                                     | 16 |

#### I. General Information

All air or moisture sensitive reactions were conducted in oven-dried glassware under nitrogen atmosphere using dry solvents. Anhydrous toluene were freshly distilled from sodium. Unless otherwise stated, chemicals and reagents were used as received. Flash column chromatography was performed over silica gel (200-300 mesh) purchased from *Qindao Bangkai Co., China*. <sup>1</sup>H and <sup>13</sup>C NMR spectra were recorded on a Bruker AV 500 MHz NMR spectrometer using residue solvent peaks as an internal standard (<sup>1</sup>H NMR: CHCl<sub>3</sub> at 7.26 ppm, <sup>13</sup>C NMR: CDCl<sub>3</sub> at 77.0 ppm). HRMS were recorded on an Agilent 6545 Q-TOF LC/MS instrument with electrospray ionization (ESI) technique.

## II. Preparation of Materials

### 2.1. Synthesis of *p*-Quinone Methide Substrates

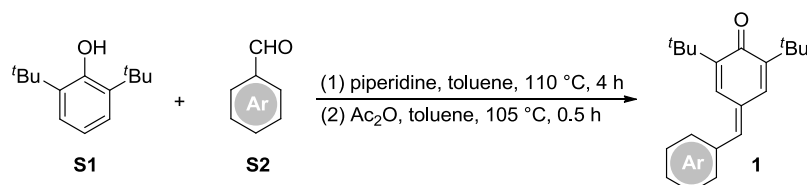

*p*-Quinone methide substrates **1a-1ah**, **1aj** were synthesized according to the literature reported procedure.<sup>1</sup> They are known compounds.

### 2.2. Synthesis of *p*-Quinone Methide **1ai** and **4a**

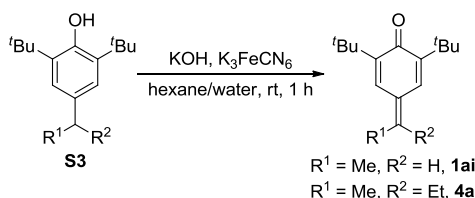

*p*-Quinone methide **1ai** and **4a** were synthesized according to the literature reported procedure.<sup>2</sup> They are known compounds.

### 2.3. Synthesis of *p*-Quinone Methide **4b**

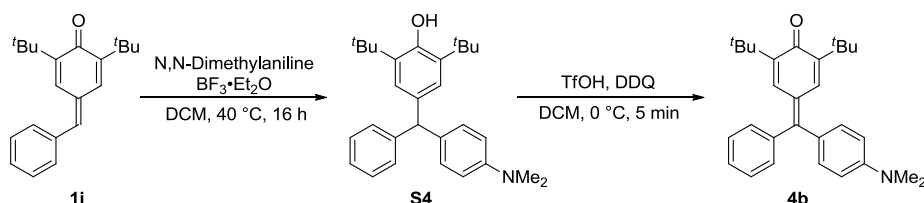

*p*-Quinone methide **4b** was synthesized according to the literature reported procedure.<sup>3</sup> It is a known compound.

### 2.4. Synthesis of Diborylmethane **2a**

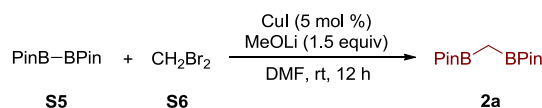

<sup>1</sup> D. Richter, N. Hampel, T. Singer, A. R. Ofial, H. Mayr, *Eur. J. Org. Chem.* **2009**, 19, 3203.

<sup>2</sup> Z.-Q. Liu, P.-S. You, L.-D. Zhang, D.-Q. Liu, S.-S. Liu, X.-Y. Guan, *Molecules* **2020**, 25, 539.

<sup>3</sup> S. Gao, X. Xu, Z. Yuan, H. Zhou, H. Yao, A. Lin, *Eur. J. Org. Chem.* **2016**, 3006.

Diborylmethane **2a** was synthesized according to the literature reported procedure.<sup>4</sup> It is a known compound.

### III. Screening of Reaction Conditions

**Table S1. Screening of Solvents and Copper Catalysts**

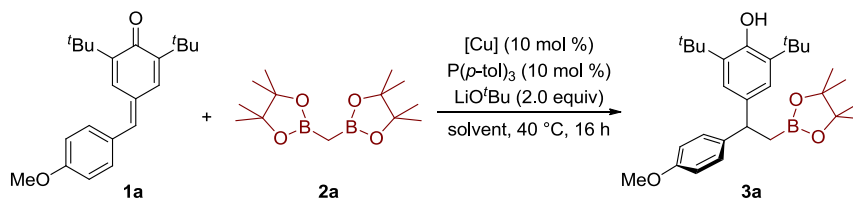

| entry           | solvent | [Cu]                              | yield (%) |
|-----------------|---------|-----------------------------------|-----------|
| 1               | THF     | Cu(OTf) <sub>2</sub>              | trace     |
| 2               | MeCN    | Cu(OTf) <sub>2</sub>              | trace     |
| 3               | dioxane | Cu(OTf) <sub>2</sub>              | 20        |
| 4               | hexane  | Cu(OTf) <sub>2</sub>              | trace     |
| 5               | toluene | Cu(OTf) <sub>2</sub>              | 84        |
| 6               | toluene | CuSCN                             | trace     |
| 7               | toluene | CuCl                              | 67        |
| 8               | toluene | CuBr                              | < 5       |
| 9               | toluene | CuI                               | < 5       |
| 10              | toluene | CuTc                              | 44        |
| 11              | toluene | Cu <sub>2</sub> O                 | trace     |
| 12              | toluene | CuCl <sub>2</sub>                 | 30        |
| 13              | toluene | CuBr <sub>2</sub>                 | trace     |
| 14              | toluene | CuF <sub>2</sub>                  | trace     |
| 15              | toluene | Cu(NO <sub>3</sub> ) <sub>2</sub> | 36        |
| 16              | toluene | Cu(acac) <sub>2</sub>             | 49        |
| 17              | toluene | Cu(OAc) <sub>2</sub>              | 73        |
| 18              | toluene | none                              | 0         |
| 19 <sup>a</sup> | toluene | Cu(OTf) <sub>2</sub>              | 95        |
| 20 <sup>b</sup> | toluene | Cu(OTf) <sub>2</sub>              | 93        |
| 21 <sup>c</sup> | toluene | Cu(OTf) <sub>2</sub>              | 16        |

a: the reaction was performed at 50 °C

b: the reaction was performed at 60 °C

c: the reaction was performed at rt

<sup>4</sup> X. Liu, T. M. Deaton, F. Haeffner, J. P. Morken, *Angew. Chem., Int. Ed.* **2017**, *56*, 11485.

Table S2. Screening of Ligands

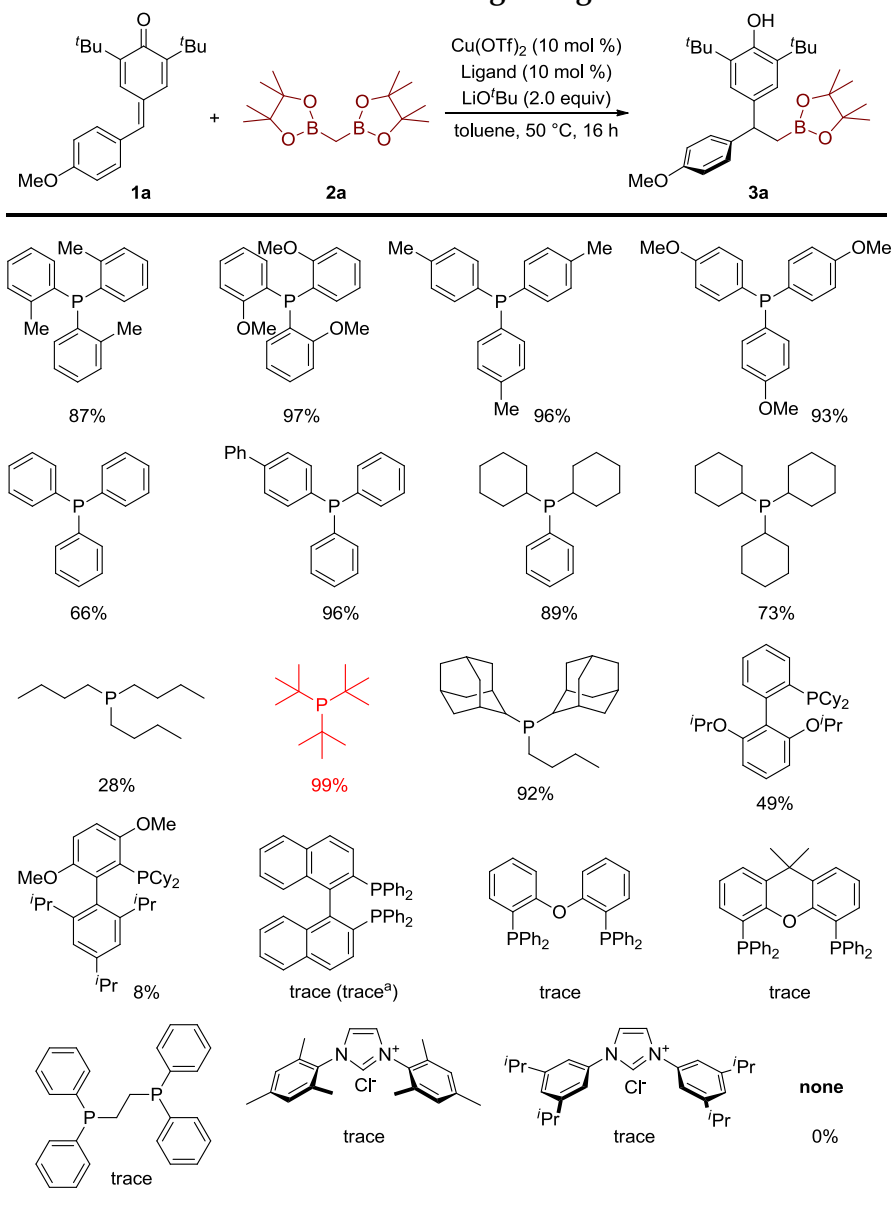

a: 5 mol% of ligand was used

**Table S3. Screening of Base and Other Reaction Conditions**

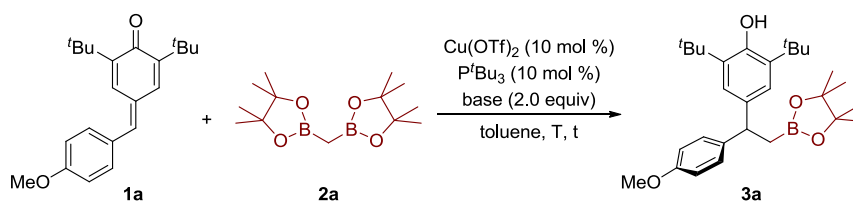

| entry           | base                            | T (°C) | t (h) | yield (%) |
|-----------------|---------------------------------|--------|-------|-----------|
| 1               | LiO <sup>t</sup> Bu             | 50     | 16    | 98        |
| 2               | NaO <sup>t</sup> Bu             | 50     | 16    | 69        |
| 3               | KO <sup>t</sup> Bu              | 50     | 16    | 97        |
| 4               | LiOMe                           | 50     | 16    | 77        |
| 5               | NaOMe                           | 50     | 16    | 17        |
| 6               | LiOH                            | 50     | 16    | 50        |
| 7               | KF                              | 50     | 16    | 19        |
| 8               | Cs <sub>2</sub> CO <sub>3</sub> | 50     | 16    | 64        |
| 9               | LiO <sup>t</sup> Bu             | 60     | 16    | 94        |
| 10              | LiO <sup>t</sup> Bu             | 40     | 20    | 89        |
| 11              | LiO <sup>t</sup> Bu             | rt     | 20    | 15        |
| 12              | LiO <sup>t</sup> Bu             | 50     | 12    | 93        |
| 13              | LiO <sup>t</sup> Bu             | 50     | 8     | 82        |
| 14 <sup>a</sup> | LiO <sup>t</sup> Bu             | 50     | 16    | trace     |
| 15 <sup>b</sup> | NaO <sup>t</sup> Bu             | 50     | 16    | 0         |
| 16 <sup>b</sup> | KO <sup>t</sup> Bu              | 50     | 16    | 0         |

a: The reaction was performed under air b: Without  $\text{Cu}(\text{OTf})_2$  and  $\text{P}^t\text{Bu}_3$

**Table S4. Screening of the Equivalents of Catalyst/Ligand/Base**

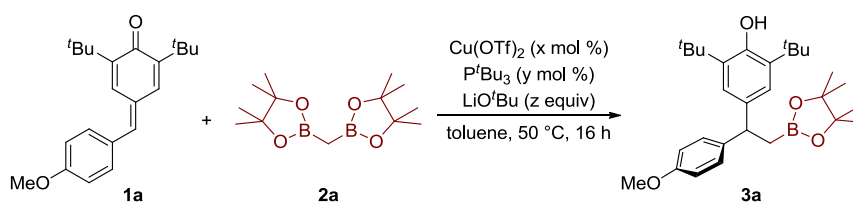

| entry          | x  | y  | z   | yield (%) |
|----------------|----|----|-----|-----------|
| 1              | 5  | 5  | 2   | 78        |
| 2              | 5  | 10 | 2   | 75        |
| 3              | 10 | 10 | 2   | 99        |
| 4              | 10 | 20 | 2   | 97        |
| 5              | 10 | 10 | 1   | 66        |
| 6              | 10 | 10 | 1.5 | 96        |
| 7              | 10 | 10 | 2.5 | 93        |
| 8 <sup>a</sup> | 10 | 10 | 2   | 43        |
| 9 <sup>b</sup> | 10 | 10 | 2   | 92        |

a: 1.0 equiv of **2a** was used b: 2.0 equiv of **2a** was used

#### IV. 1,6-Conjugate Addition of Diboryl methane

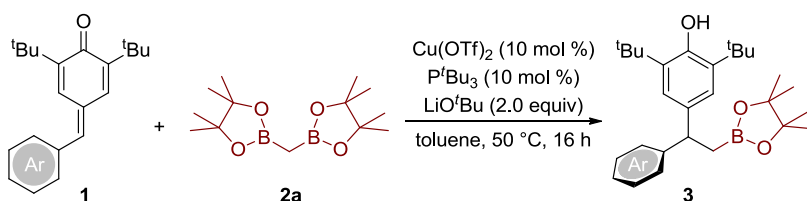

An oven-dried Schlenk tube equipped with a Teflon sealed cap was charged with  $\text{Cu}(\text{OTf})_2$  (1.8 mg, 0.005 mmol, 10 mol%),  $\text{LiO}^t\text{Bu}$  (8.0 mg, 0.1 mmol, 2.0 equiv), *p*-quinone methide substrates (0.05 mmol) and a stir bar. Then a solution of diboryl methane (33.5 mg, 0.125 mmol, 2.5 equiv) and  $\text{P}^t\text{Bu}_3$  (15  $\mu\text{L}$ , 10% in pentane) in anhydrous toluene (0.5 mL) was added to the tube. The tube was degassed and refilled with nitrogen for 3 times, sealed, and then heated at 50 °C for 16 hours. The reaction was quenched with saturated  $\text{NH}_4\text{Cl}$  and the aqueous layer was extracted with ethyl acetate (3  $\times$  20 mL). The combined organic layers were dried with  $\text{Na}_2\text{SO}_4$ , filtered, and concentrated under reduced pressure. The residue was purified by silica gel column chromatography (petroleum ether/ethyl acetate) to afford the pure product.

#### 2,6-di-*tert*-butyl-4-(1-(4-methoxyphenyl)-2-(4,4,5,5-tetramethyl-1,3,2-dioxaborolan-2-yl)ethyl)phenol (3a)

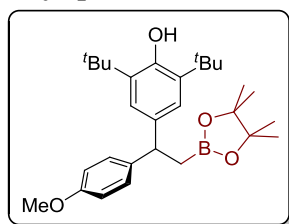

$^1\text{H NMR}$  (500 MHz,  $\text{CDCl}_3$ )  $\delta$  7.26 (d,  $J$  = 8.7 Hz, 2H), 7.12 (s, 2H), 6.84 (d,  $J$  = 8.7 Hz, 1H), 5.03 (s, 1H), 4.18 (t,  $J$  = 8.6 Hz, 1H), 3.79 (s, 3H), 1.61 (d,  $J$  = 8.6 Hz, 2H), 1.45 (s, 18H), 1.08 (s, 6H), 1.07 (s, 6H).

$^{13}\text{C NMR}$  (125 MHz,  $\text{CDCl}_3$ )  $\delta$  157.6, 151.8, 139.6, 137.3, 135.3, 128.4, 124.1, 113.5, 82.9, 55.2, 45.9, 34.3, 30.3, 24.57, 24.56.

$^{11}\text{B NMR}$  (160 MHz,  $\text{CDCl}_3$ )  $\delta$  34.26.

HRMS: (ESI<sup>+</sup>)  $[\text{M}+\text{Na}]^+$  calcd for  $\text{C}_{29}\text{H}_{43}\text{BO}_4\text{Na}$ : 489.3147, found: 489.3145.

#### 2,6-di-*tert*-butyl-4-(1-(4-fluorophenyl)-2-(4,4,5,5-tetramethyl-1,3,2-dioxaborolan-2-yl)ethyl)phenol (3b)

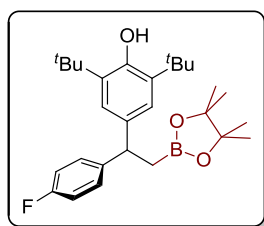

$^1\text{H NMR}$  (500 MHz,  $\text{CDCl}_3$ )  $\delta$  7.28 – 7.23 (m, 2H), 7.07 (s, 2H), 6.98 – 6.92 (m, 2H), 5.03 (s, 1H), 4.18 (t,  $J$  = 8.6 Hz, 1H), 1.58 (d,  $J$  = 8.6 Hz, 2H), 1.42 (s, 18H), 1.05 (s, 12H).

$^{13}\text{C NMR}$  (125 MHz,  $\text{CDCl}_3$ )  $\delta$  161.1 (d,  $J$  = 243.0 Hz), 151.9, 142.9 (d,  $J$  = 3.1 Hz), 136.9, 135.4, 128.9 (d,  $J$  = 7.8 Hz), 124.0, 114.8 (d,  $J$  = 20.9 Hz), 83.0, 45.9, 34.3, 30.3, 24.6, 24.5.

$^{11}\text{B NMR}$  (160 MHz,  $\text{CDCl}_3$ )  $\delta$  33.51.

HRMS: (ESI<sup>+</sup>)  $[\text{M}+\text{Na}]^+$  calcd for  $\text{C}_{28}\text{H}_{40}\text{FBO}_3\text{Na}$ : 477.2947, found: 477.2953.

#### 2,6-di-*tert*-butyl-4-(1-(4-chlorophenyl)-2-(4,4,5,5-tetramethyl-1,3,2-dioxaborolan-2-yl)ethyl)phenol (3c)

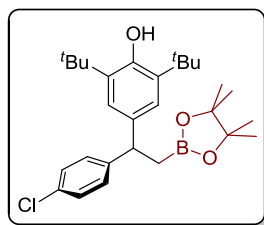

$^1\text{H NMR}$  (500 MHz,  $\text{CDCl}_3$ )  $\delta$  7.24 (s, 4H), 7.06 (s, 2H), 5.04 (s, 1H), 4.17 (t,  $J$  = 8.6 Hz, 1H), 1.57 (d,  $J$  = 8.6 Hz, 2H), 1.42 (s, 18H), 1.06 (s, 6H), 1.06 (s, 6H).

$^{13}\text{C NMR}$  (125 MHz,  $\text{CDCl}_3$ )  $\delta$  152.0, 145.8, 136.4, 135.5, 131.3,

128.9, 128.2, 124.1, 83.1, 46.0, 34.3, 30.3, 24.58, 24.55.

$^{11}\text{B}$  NMR (160 MHz,  $\text{CDCl}_3$ )  $\delta$  33.79.

HRMS: (ESI<sup>+</sup>)  $[\text{M}+\text{Na}]^+$  calcd for  $\text{C}_{28}\text{H}_{40}\text{ClBO}_3\text{Na}$ : 493.2651, found: 493.2655.

**4-(1-(4-bromophenyl)-2-(4,4,5,5-tetramethyl-1,3,2-dioxaborolan-2-yl)ethyl)-2,6-di-tert-butylphenol (3d)**

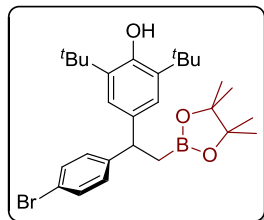

$^1\text{H}$  NMR (500 MHz,  $\text{CDCl}_3$ )  $\delta$  7.38 (d,  $J$  = 8.4 Hz, 1H), 7.18 (d,  $J$  = 8.4 Hz, 2H), 7.06 (s, 2H), 5.04 (s, 1H), 4.16 (t,  $J$  = 8.5 Hz, 1H), 1.57 (d,  $J$  = 8.5 Hz, 2H), 1.42 (s, 18H), 1.06 (s, 6H), 1.06 (s, sH).

$^{13}\text{C}$  NMR (125 MHz,  $\text{CDCl}_3$ )  $\delta$  152.0, 146.4, 136.3, 135.5, 131.1, 129.3, 124.1, 119.3, 83.1, 46.1, 34.3, 30.3, 24.57, 24.56.

$^{11}\text{B}$  NMR (160 MHz,  $\text{CDCl}_3$ )  $\delta$  33.18.

HRMS: (ESI<sup>+</sup>)  $[\text{M}+\text{Na}]^+$  calcd for  $\text{C}_{28}\text{H}_{40}\text{BrBO}_3\text{Na}$ : 537.2146, found: 537.2152.

**4-(1-(3,5-di-tert-butyl-4-hydroxyphenyl)-2-(4,4,5,5-tetramethyl-1,3,2-dioxaborolan-2-yl)ethyl)benzoate (3e)**

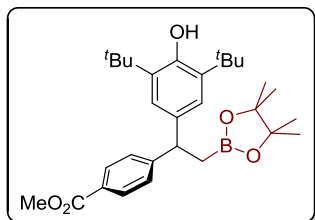

$^1\text{H}$  NMR (500 MHz,  $\text{CDCl}_3$ )  $\delta$  7.95 (d,  $J$  = 8.4 Hz, 2H), 7.38 (d,  $J$  = 8.4 Hz, 2H), 7.07 (s, 2H), 5.04 (s, 1H), 4.25 (t,  $J$  = 8.5 Hz, 1H), 3.90 (s, 3H), 1.61 (d,  $J$  = 8.5 Hz, 2H), 1.41 (s, 18H), 1.05 (s, 6H), 1.05 (s, 6H).

$^{13}\text{C}$  NMR (125 MHz,  $\text{CDCl}_3$ )  $\delta$  167.2, 152.7, 152.0, 136.1, 135.5, 129.6, 127.61, 127.57, 124.1, 83.1, 51.9, 46.7, 34.3, 30.3, 24.6,

24.5.

$^{11}\text{B}$  NMR (160 MHz,  $\text{CDCl}_3$ )  $\delta$  35.11.

HRMS: (ESI<sup>+</sup>)  $[\text{M}+\text{Na}]^+$  calcd for  $\text{C}_{30}\text{H}_{43}\text{BO}_5\text{Na}$ : 517.3096, found: 517.3093.

**4-(1-(3,5-di-tert-butyl-4-hydroxyphenyl)-2-(4,4,5,5-tetramethyl-1,3,2-dioxaborolan-2-yl)ethyl)benzonitrile (3f)**

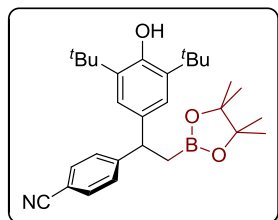

$^1\text{H}$  NMR (500 MHz,  $\text{CDCl}_3$ )  $\delta$  7.56 (d,  $J$  = 8.4 Hz, 2H), 7.40 (d,  $J$  = 8.4 Hz, 2H), 7.04 (s, 2H), 5.08 (s, 1H), 4.24 (t,  $J$  = 8.5 Hz, 1H), 1.59 (dd,  $J$  = 8.5, 3.2 Hz, 2H), 1.42 (s, 18H), 1.05 (s, 12H).

$^{13}\text{C}$  NMR (125 MHz,  $\text{CDCl}_3$ )  $\delta$  152.9, 152.2, 135.7, 135.3, 132.1, 128.3, 124.1, 119.2, 109.4, 83.2, 46.7, 34.3, 30.3, 24.6, 24.5.

$^{11}\text{B}$  NMR (160 MHz,  $\text{CDCl}_3$ )  $\delta$  33.57.

HRMS: (ESI<sup>+</sup>)  $[\text{M}+\text{Na}]^+$  calcd for  $\text{C}_{29}\text{H}_{40}\text{BNO}_3\text{Na}$ : 484.2993, found: 484.2997.

**2,6-di-tert-butyl-4-(2-(4,4,5,5-tetramethyl-1,3,2-dioxaborolan-2-yl)-1-(4-(trifluoromethyl)phenyl)ethyl)phenol (3g)**

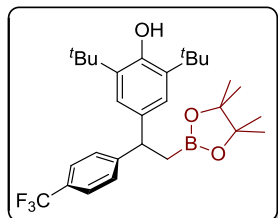

$^1\text{H}$  NMR (500 MHz,  $\text{CDCl}_3$ )  $\delta$  7.53 (d,  $J$  = 8.1 Hz, 2H), 7.42 (d,  $J$  = 8.1 Hz, 2H), 7.09 (s, 2H), 5.06 (s, 1H), 4.25 (t,  $J$  = 8.6 Hz, 1H), 1.62 (dd,  $J$  = 4.3, 2.1 Hz, 2H), 1.43 (s, 18H), 1.06 (s, 6H), 1.05 (s, 6H).

$^{13}\text{C}$  NMR (125 MHz,  $\text{CDCl}_3$ )  $\delta$  152.1, 151.5, 135.8, 135.6, 127.9 (q,  $J$  = 31.6 Hz), 127.8, 125.1 (q,  $J$  = 3.7 Hz), 124.4 (q,  $J$  = 273.4 Hz), 124.1, 83.1, 46.5, 34.4, 30.3, 24.54, 24.52.

$^{11}\text{B}$  NMR (160 MHz,  $\text{CDCl}_3$ )  $\delta$  33.81.

HRMS: (ESI<sup>+</sup>)  $[\text{M}+\text{Na}]^+$  calcd for  $\text{C}_{29}\text{H}_{40}\text{BF}_3\text{O}_3\text{Na}$ : 527.2915, found: 527.2924.

**2,6-di-tert-butyl-4-(1-(4-nitrophenyl)-2-(4,4,5,5-tetramethyl-1,3,2-dioxaborolan-2-yl)ethyl)phenol (3h)**

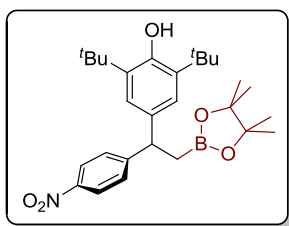

$^1\text{H NMR}$  (500 MHz,  $\text{CDCl}_3$ )  $\delta$  8.14 (d,  $J$  = 8.8 Hz, 2H), 7.45 (d,  $J$  = 8.8 Hz, 2H), 7.05 (s, 2H), 5.09 (s, 1H), 4.30 (t,  $J$  = 8.5 Hz, 1H), 1.62 (d,  $J$  = 8.5 Hz, 1H), 1.42 (s, 18H), 1.06 (s, 6H), 1.06 (s, 6H).

$^{13}\text{C NMR}$  (125 MHz,  $\text{CDCl}_3$ )  $\delta$  155.2, 152.3, 146.1, 135.8, 135.2, 128.3, 124.1, 123.5, 83.2, 46.5, 34.4, 30.3, 24.57, 24.55.

$^{11}\text{B NMR}$  (160 MHz,  $\text{CDCl}_3$ )  $\delta$  33.52.

**HRMS:** (ESI<sup>+</sup>) [M+Na]<sup>+</sup> calcd for  $\text{C}_{28}\text{H}_{40}\text{BNO}_5\text{Na}$ : 504.2892, found: 504.2896.

**2,6-di-tert-butyl-4-(1-phenyl-2-(4,4,5,5-tetramethyl-1,3,2-dioxaborolan-2-yl)ethyl)phenol (3i)**

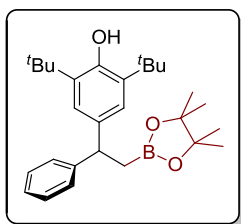

$^1\text{H NMR}$  (500 MHz,  $\text{CDCl}_3$ )  $\delta$  7.33 (dd,  $J$  = 8.1, 1.5 Hz, 2H), 7.27 (d,  $J$  = 8.1 Hz, 1H), 7.18 – 7.13 (m, 1H), 7.12 (s, 2H), 5.02 (s, 1H), 4.21 (t,  $J$  = 8.7 Hz, 1H), 1.62 (d,  $J$  = 8.7 Hz, 2H), 1.43 (s, 18H), 1.06 (s, 6H), 1.05 (s, 6H).

$^{13}\text{C NMR}$  (125 MHz,  $\text{CDCl}_3$ )  $\delta$  151.8, 147.2, 136.9, 135.3, 128.1, 127.5, 125.6, 124.2, 82.9, 46.7, 34.3, 30.3, 24.54, 24.53.

$^{11}\text{B NMR}$  (160 MHz,  $\text{CDCl}_3$ )  $\delta$  33.72.

**HRMS:** (ESI<sup>+</sup>) [M+Na]<sup>+</sup> calcd for  $\text{C}_{28}\text{H}_{41}\text{BO}_3\text{Na}$ : 459.3041, found: 459.3049.

**4-(1-([1,1'-biphenyl]-4-yl)-2-(4,4,5,5-tetramethyl-1,3,2-dioxaborolan-2-yl)ethyl)-2,6-di-tert-butylphenol (3j)**

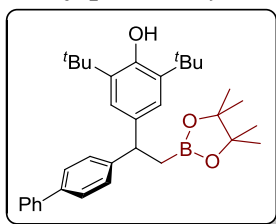

$^1\text{H NMR}$  (500 MHz,  $\text{CDCl}_3$ )  $\delta$  7.63 – 7.56 (m, 2H), 7.52 (d,  $J$  = 8.3 Hz, 2H), 7.43 (dd,  $J$  = 8.3, 7.0 Hz, 2H), 7.40 (d,  $J$  = 8.3 Hz, 2H), 7.36 – 7.31 (m, 1H), 7.16 (s, 2H), 5.03 (s, 1H), 4.25 (t,  $J$  = 8.6 Hz, 1H), 1.65 (d,  $J$  = 8.6 Hz, 2H), 1.44 (s, 18H), 1.06 (s, 6H), 1.05 (s, 6H).

$^{13}\text{C NMR}$  (125 MHz,  $\text{CDCl}_3$ )  $\delta$  151.9, 146.5, 141.2, 138.5, 136.8, 135.4, 128.6, 127.9, 126.93, 126.88, 126.86, 124.2, 83.0, 46.4, 34.4, 30.3, 24.6, 24.5.

$^{11}\text{B NMR}$  (160 MHz,  $\text{CDCl}_3$ )  $\delta$  33.72.

**HRMS:** (ESI<sup>+</sup>) [M+Na]<sup>+</sup> calcd for  $\text{C}_{34}\text{H}_{45}\text{BO}_3\text{Na}$ : 535.3354, found: 535.3360.

**2,6-di-tert-butyl-4-(2-(4,4,5,5-tetramethyl-1,3,2-dioxaborolan-2-yl)-1-(p-tolyl)ethyl)phenol (3k)**

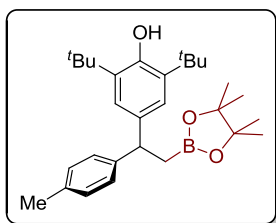

$^1\text{H NMR}$  (500 MHz,  $\text{CDCl}_3$ )  $\delta$  7.21 (d,  $J$  = 8.1 Hz, 2H), 7.12 (s, 2H), 7.08 (d,  $J$  = 8.1 Hz, 2H), 5.00 (s, 1H), 4.17 (t,  $J$  = 8.7 Hz, 1H), 2.31 (s, 3H), 1.60 (dd,  $J$  = 8.7, 2.6 Hz, 2H), 1.43 (s, 18H), 1.06 (s, 6H), 1.04 (s, 6H).

$^{13}\text{C NMR}$  (125 MHz,  $\text{CDCl}_3$ )  $\delta$  151.8, 144.4, 137.0, 135.2, 134.9, 128.8, 127.3, 124.1, 82.9, 46.3, 34.3, 30.3, 24.6, 24.5, 20.9.

$^{11}\text{B NMR}$  (160 MHz,  $\text{CDCl}_3$ )  $\delta$  33.27.

**HRMS:** (ESI<sup>+</sup>) [M+H]<sup>+</sup> calcd for  $\text{C}_{29}\text{H}_{44}\text{BO}_3$ : 451.3378, found: 451.3388.

**2,6-di-tert-butyl-4-(1-(4-(tert-butyl)phenyl)-2-(4,4,5,5-tetramethyl-1,3,2-dioxaborolan-2-yl)ethyl)phenol (3l)**

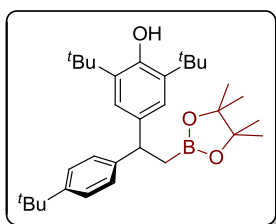

$^1\text{H NMR}$  (500 MHz,  $\text{CDCl}_3$ )  $\delta$  7.28 (d,  $J$  = 8.5 Hz, 2H), 7.24 (d,  $J$  = 8.5 Hz, 2H), 7.14 (s, 2H), 5.00 (s, 1H), 4.15 (t,  $J$  = 8.7 Hz, 1H), 1.61 (d,  $J$  = 8.7 Hz, 2H), 1.43 (s, 18H), 1.30 (s, 9H), 1.03 (s, 6H), 1.00 (s, 6H).



$^{13}\text{C}$  NMR (125 MHz,  $\text{CDCl}_3$ )  $\delta$  151.8, 148.3, 144.3, 136.9, 135.2, 127.0, 125.0, 124.2, 82.9, 46.4, 34.32, 34.26, 31.4, 30.3, 24.6, 24.5.

$^{11}\text{B}$  NMR (160 MHz,  $\text{CDCl}_3$ )  $\delta$  33.91.

HRMS: (ESI<sup>+</sup>)  $[\text{M}+\text{Na}]^+$  calcd for  $\text{C}_{32}\text{H}_{49}\text{BO}_3\text{Na}$ : 515.3667, found: 515.3662.

**2,6-di-tert-butyl-4-(1-(4-ethoxyphenyl)-2-(4,4,5,5-tetramethyl-1,3,2-dioxaborolan-2-yl)ethyl)phenol (3m)**

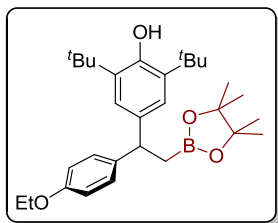

$^1\text{H}$  NMR (500 MHz,  $\text{CDCl}_3$ )  $\delta$  7.21 (d,  $J$  = 8.7 Hz, 2H), 7.09 (s, 2H), 6.81 (d,  $J$  = 8.7 Hz, 2H), 5.00 (s, 1H), 4.14 (t,  $J$  = 8.6 Hz, 1H), 4.01 (q,  $J$  = 7.0 Hz, 2H), 1.58 (d,  $J$  = 8.6 Hz, 2H), 1.42 (s, 18H), 1.40 (t,  $J$  = 7.0 Hz, 3H), 1.05 (s, 6H), 1.04 (s, 6H).

$^{13}\text{C}$  NMR (125 MHz,  $\text{CDCl}_3$ )  $\delta$  156.9, 151.7, 139.4, 137.4, 135.3, 128.4, 124.1, 114.2, 82.9, 63.4, 45.9, 34.3, 30.33, 24.6, 24.6, 14.9.

$^{11}\text{B}$  NMR (160 MHz,  $\text{CDCl}_3$ )  $\delta$  33.70.

HRMS: (ESI<sup>+</sup>)  $[\text{M}+\text{Na}]^+$  calcd for  $\text{C}_{30}\text{H}_{45}\text{BO}_3\text{Na}$ : 503.3303, found: 503.3308.

**2,6-di-tert-butyl-4-(1-(4-(dimethylamino)phenyl)-2-(4,4,5,5-tetramethyl-1,3,2-dioxaborolan-2-yl)ethyl)phenol (3n)**

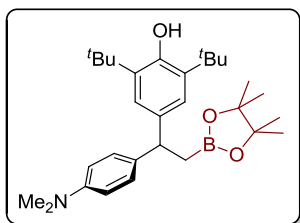

$^1\text{H}$  NMR (500 MHz,  $\text{CDCl}_3$ )  $\delta$  7.19 (d,  $J$  = 8.7 Hz, 2H), 7.11 (s, 2H), 6.69 (d,  $J$  = 8.7 Hz, 2H), 4.97 (s, 1H), 4.11 (t,  $J$  = 8.7 Hz, 1H), 2.90 (s, 6H), 1.58 (dd,  $J$  = 8.7, 1.2 Hz, 2H), 1.42 (s, 18H), 1.06 (s, 6H), 1.03 (s, 6H).

$^{13}\text{C}$  NMR (125 MHz,  $\text{CDCl}_3$ )  $\delta$  151.7, 148.9, 137.5, 136.1, 135.1, 127.9, 124.1, 113.0, 82.8, 45.8, 41.0, 34.3, 30.3, 24.7, 24.6, 24.5.

$^{11}\text{B}$  NMR (160 MHz,  $\text{CDCl}_3$ )  $\delta$  34.05.

HRMS: (ESI<sup>+</sup>)  $[\text{M}+\text{Na}]^+$  calcd for  $\text{C}_{30}\text{H}_{46}\text{BNO}_3\text{Na}$ : 502.3463, found: 502.3468.

**2,6-di-tert-butyl-4-(1-(4-(diphenylamino)phenyl)-2-(4,4,5,5-tetramethyl-1,3,2-dioxaborolan-2-yl)ethyl)phenol (3o)**

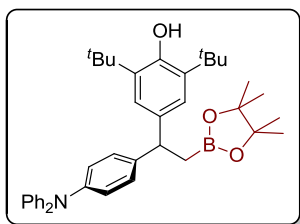

$^1\text{H}$  NMR (500 MHz,  $\text{CDCl}_3$ )  $\delta$  7.26 – 7.18 (m, 6H), 7.12 (s, 2H), 7.09 – 7.04 (m, 4H), 7.04 – 7.00 (m, 2H), 6.98 (tt,  $J$  = 7.3, 1.2 Hz, 2H), 5.04 (s, 1H), 4.17 (t,  $J$  = 8.6 Hz, 1H), 1.61 (d,  $J$  = 8.6 Hz, 1H), 1.44 (s, 18H), 1.09 (s, 12H).

$^{13}\text{C}$  NMR (125 MHz,  $\text{CDCl}_3$ )  $\delta$  151.8, 148.0, 145.4, 142.0, 137.3, 135.3, 129.0, 128.5, 124.6, 124.2, 123.6, 122.2, 83.0, 46.1, 34.4,

30.3, 24.6, 24.6.

$^{11}\text{B}$  NMR (160 MHz,  $\text{CDCl}_3$ )  $\delta$  34.10.

HRMS: (ESI<sup>+</sup>)  $[\text{M}+\text{Na}]^+$  calcd for  $\text{C}_{30}\text{H}_{46}\text{BNO}_3\text{Na}$ : 626.3776, found: 626.3773.

**2,6-di-tert-butyl-4-(1-(4-(piperidin-1-yl)phenyl)-2-(4,4,5,5-tetramethyl-1,3,2-dioxaborolan-2-yl)ethyl)phenol (3p)**

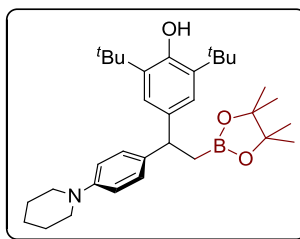

$^1\text{H}$  NMR (500 MHz,  $\text{CDCl}_3$ )  $\delta$  7.18 (d,  $J$  = 8.5 Hz, 2H), 7.09 (s, 2H), 6.86 (d,  $J$  = 8.5 Hz, 2H), 4.98 (s, 1H), 4.11 (t,  $J$  = 8.7 Hz, 1H), 3.17 – 3.01 (m, 4H), 1.79 – 1.67 (m, 4H), 1.57 (d,  $J$  = 8.7 Hz, 2H), 1.59 – 1.52 (m, 2H), 1.41 (s, 18H), 1.05 (s, 6H), 1.03 (s, 6H).

$^{13}\text{C}$  NMR (125 MHz,  $\text{CDCl}_3$ )  $\delta$  151.7, 150.4, 138.5, 137.5, 135.2, 128.0, 124.1, 116.7, 82.9, 51.2, 45.9, 34.3, 30.3, 25.9, 24.7, 24.6,

24.6.

$^{11}\text{B}$  NMR (160 MHz,  $\text{CDCl}_3$ )  $\delta$  33.78.

HRMS: (ESI<sup>+</sup>)  $[\text{M}+\text{Na}]^+$  calcd for  $\text{C}_{33}\text{H}_{50}\text{BNO}_3\text{Na}$ : 542.3776, found: 542.3779.

**2,6-di-tert-butyl-4-(1-(4-morpholinophenyl)-2-(4,4,5,5-tetramethyl-1,3,2-dioxaborolan-2-yl)ethyl)phenol (3q)**

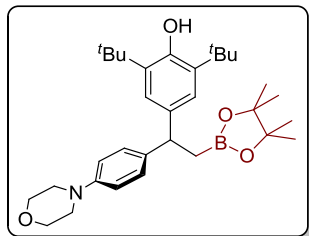

$^1\text{H}$  NMR (500 MHz,  $\text{CDCl}_3$ )  $\delta$  7.22 (d,  $J$  = 8.5 Hz, 2H), 7.09 (s, 2H), 6.84 (d,  $J$  = 8.5 Hz, 2H), 5.00 (s, 1H), 4.13 (t,  $J$  = 8.6 Hz, 1H), 3.93 – 3.81 (m, 4H), 3.11 (dd,  $J$  = 5.8, 3.8 Hz, 4H), 1.58 (d,  $J$  = 8.6 Hz, 2H), 1.42 (s, 18H), 1.05 (s, 6H), 1.04 (s, 6H).

$^{13}\text{C}$  NMR (125 MHz,  $\text{CDCl}_3$ )  $\delta$  151.7, 149.3, 139.3, 137.2, 135.3, 128.1, 124.1, 115.8, 82.9, 67.0, 49.8, 45.9, 34.3, 30.3, 24.6, 24.5.

$^{11}\text{B}$  NMR (160 MHz,  $\text{CDCl}_3$ )  $\delta$  35.03.

HRMS: (ESI<sup>+</sup>)  $[\text{M}+\text{Na}]^+$  calcd for  $\text{C}_{32}\text{H}_{48}\text{BNO}_4\text{Na}$ : 544.3569, found: 544.3572.

**2,6-di-tert-butyl-4-(1-(2-chlorophenyl)-2-(4,4,5,5-tetramethyl-1,3,2-dioxaborolan-2-yl)ethyl)phenol (3r)**

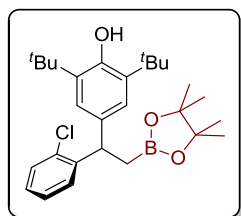

$^1\text{H}$  NMR (500 MHz,  $\text{CDCl}_3$ )  $\delta$  7.39 (dd,  $J$  = 7.8, 1.7 Hz, 1H), 7.32 (dd,  $J$  = 7.9, 1.3 Hz, 1H), 7.21 (td,  $J$  = 7.6, 1.4 Hz, 1H), 7.16 (s, 2H), 7.08 (td,  $J$  = 7.7, 1.7 Hz, 1H), 5.02 (s, 1H), 4.74 (t,  $J$  = 8.7 Hz, 1H), 1.64 (dd,  $J$  = 15.2, 8.7 Hz, 1H), 1.57 (dd,  $J$  = 15.2, 8.7 Hz, 1H), 1.42 (s, 18H), 1.03 (s, 12H).

$^{13}\text{C}$  NMR (125 MHz,  $\text{CDCl}_3$ )  $\delta$  151.9, 144.5, 135.5, 135.2, 133.7, 129.4, 128.3, 126.79, 126.75, 124.5, 83.0, 42.2, 34.3, 30.3, 24.48, 24.46.

$^{11}\text{B}$  NMR (160 MHz,  $\text{CDCl}_3$ )  $\delta$  33.68.

HRMS: (ESI<sup>+</sup>)  $[\text{M}+\text{Na}]^+$  calcd for  $\text{C}_{28}\text{H}_{40}\text{ClBO}_3\text{Na}$ : 493.2651, found: 493.2656.

**2,6-di-tert-butyl-4-(2-(4,4,5,5-tetramethyl-1,3,2-dioxaborolan-2-yl)-1-(o-tolyl)ethyl)phenol (3s)**

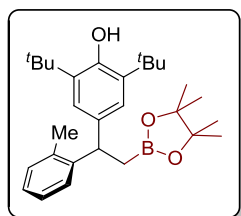

$^1\text{H}$  NMR (500 MHz,  $\text{CDCl}_3$ )  $\delta$  7.39 (dd,  $J$  = 7.8, 1.2 Hz, 1H), 7.18 (td,  $J$  = 7.4, 1.8 Hz, 1H), 7.12 – 7.03 (m, 2H), 7.09 (s, 2H), 4.99 (s, 1H), 4.40 (t,  $J$  = 8.6 Hz, 1H), 2.40 (s, 3H), 1.60 (d,  $J$  = 8.6 Hz, 2H), 1.41 (s, 18H), 1.05 (s, 6H), 1.01 (s, 6H).

$^{13}\text{C}$  NMR (125 MHz,  $\text{CDCl}_3$ )  $\delta$  151.6, 145.0, 136.7, 135.8, 135.2, 130.0, 126.6, 125.9, 125.5, 124.3, 82.9, 42.0, 34.3, 30.3, 24.6, 24.5, 20.1.

$^{11}\text{B}$  NMR (160 MHz,  $\text{CDCl}_3$ )  $\delta$  33.90.

HRMS: (ESI<sup>+</sup>)  $[\text{M}+\text{Na}]^+$  calcd for  $\text{C}_{29}\text{H}_{43}\text{BO}_3\text{Na}$ : 473.3197, found: 473.3203.

**2,6-di-tert-butyl-4-(1-(2-methoxyphenyl)-2-(4,4,5,5-tetramethyl-1,3,2-dioxaborolan-2-yl)ethyl)phenol (3t)**

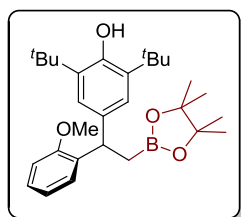

$^1\text{H}$  NMR (500 MHz,  $\text{CDCl}_3$ )  $\delta$  7.30 (dd,  $J$  = 7.7, 1.8 Hz, 1H), 7.19 (s, 2H), 7.14 (td,  $J$  = 7.8, 1.7 Hz, 1H), 6.91 (td,  $J$  = 7.5, 1.1 Hz, 1H), 6.83 (dd,  $J$  = 8.1, 1.1 Hz, 1H), 4.98 (s, 1H), 4.66 (t,  $J$  = 8.8 Hz, 1H), 3.84 (s, 3H), 1.61 (dd,  $J$  = 16.9, 8.8 Hz, 2H), 1.43 (s, 18H), 1.02 (s, 6H), 1.02 (s, 6H).

$^{13}\text{C}$  NMR (125 MHz,  $\text{CDCl}_3$ )  $\delta$  156.7, 151.6, 136.6, 135.8, 134.9, 127.5, 126.5, 124.6, 120.4, 110.4, 82.8, 55.3, 38.9, 34.3, 30.4, 24.51, 24.45.

$^{11}\text{B}$  NMR (160 MHz,  $\text{CDCl}_3$ )  $\delta$  34.61.

HRMS: (ESI<sup>+</sup>) [M+Na]<sup>+</sup> calcd for C<sub>29</sub>H<sub>43</sub>BO<sub>4</sub>Na: 489.3147, found: 489.3151.

**3-(1-(3,5-di-*tert*-butyl-4-hydroxyphenyl)-2-(4,4,5,5-tetramethyl-1,3,2-dioxaborolan-2-yl)ethyl)benzonitrile (3u)**

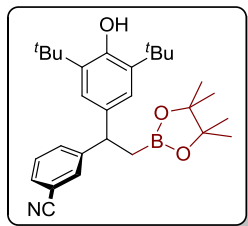

<sup>1</sup>H NMR (500 MHz, CDCl<sub>3</sub>) δ 7.59 (t, *J* = 1.8 Hz, 1H), 7.54 (dt, *J* = 7.9, 1.6 Hz, 1H), 7.45 (dt, *J* = 7.7, 1.4 Hz, 1H), 7.37 (t, *J* = 7.7 Hz, 1H), 7.05 (s, 2H), 5.09 (s, 1H), 4.23 (t, *J* = 8.5 Hz, 1H), 1.59 (dd, *J* = 8.5, 4.0 Hz, 2H), 1.43 (s, 18H), 1.07 (s, 6H), 1.06 (s, 6H).

<sup>13</sup>C NMR (125 MHz, CDCl<sub>3</sub>) δ 152.2, 148.8, 135.7, 135.4, 132.1, 131.3, 129.5, 128.9, 124.1, 119.2, 112.0, 83.2, 46.2, 34.3, 30.3, 24.6, 24.5.

<sup>11</sup>B NMR (160 MHz, CDCl<sub>3</sub>) δ 34.12.

HRMS: (ESI<sup>+</sup>) [M+Na]<sup>+</sup> calcd for C<sub>29</sub>H<sub>40</sub>BNO<sub>3</sub>Na: 484.2993, found: 484.2999.

**2,6-di-*tert*-butyl-4-(1-(3-methoxyphenyl)-2-(4,4,5,5-tetramethyl-1,3,2-dioxaborolan-2-yl)ethyl)phenol (3v)**

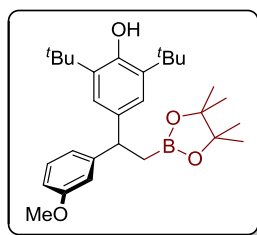

<sup>1</sup>H NMR (500 MHz, CDCl<sub>3</sub>) δ 7.19 (t, *J* = 7.9 Hz, 1H), 7.12 (s, 2H), 6.93 (dt, *J* = 7.7, 1.1 Hz, 1H), 6.87 (t, *J* = 2.1 Hz, 1H), 6.73 – 6.67 (m, 1H), 5.01 (s, 1H), 4.17 (t, *J* = 8.6 Hz, 1H), 3.79 (s, 3H), 1.60 (d, *J* = 8.6 Hz, 2H), 1.42 (s, 18H), 1.06 (s, 6H), 1.04 (s, 6H).

<sup>13</sup>C NMR (125 MHz, CDCl<sub>3</sub>) δ 159.4, 151.9, 149.1, 136.7, 135.3, 129.0, 124.2, 120.0, 113.4, 111.0, 82.9, 55.1, 46.8, 34.3, 30.3, 24.6,

24.5.

<sup>11</sup>B NMR (160 MHz, CDCl<sub>3</sub>) δ 34.66.

HRMS: (ESI<sup>+</sup>) [M+Na]<sup>+</sup> calcd for C<sub>29</sub>H<sub>43</sub>BO<sub>4</sub>Na: 489.3147, found: 489.3154.

**2,6-di-*tert*-butyl-4-(1-(3,4-dimethoxyphenyl)-2-(4,4,5,5-tetramethyl-1,3,2-dioxaborolan-2-yl)ethyl)phenol (3w)**

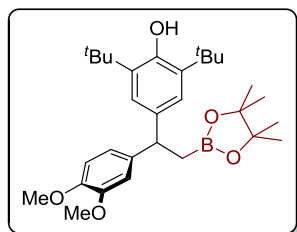

<sup>1</sup>H NMR (500 MHz, CDCl<sub>3</sub>) δ 7.11 (s, 2H), 6.88 (d, *J* = 2.1 Hz, 1H), 6.86 (dd, *J* = 8.2, 2.1 Hz, 1H), 6.79 (d, *J* = 8.2 Hz, 1H), 5.01 (s, 1H), 4.14 (t, *J* = 8.6 Hz, 1H), 3.87 (s, 3H), 3.85 (s, 3H), 1.59 (dd, *J* = 8.6, 1.8 Hz, 2H), 1.42 (s, 18H), 1.05 (s, 12H).

<sup>13</sup>C NMR (125 MHz, CDCl<sub>3</sub>) δ 151.8, 148.5, 147.0, 140.1, 137.2, 135.3, 124.0, 119.4, 111.1, 111.0, 83.0, 55.9, 55.7, 46.3, 34.3, 30.3,

24.60, 24.57.

<sup>11</sup>B NMR (160 MHz, CDCl<sub>3</sub>) δ 34.03.

HRMS: (ESI<sup>+</sup>) [M+Na]<sup>+</sup> calcd for C<sub>30</sub>H<sub>45</sub>BO<sub>5</sub>Na: 519.3252, found: 519.3258.

**2,6-di-*tert*-butyl-4-(1-(2,4-dimethoxyphenyl)-2-(4,4,5,5-tetramethyl-1,3,2-dioxaborolan-2-yl)ethyl)phenol (3x)**

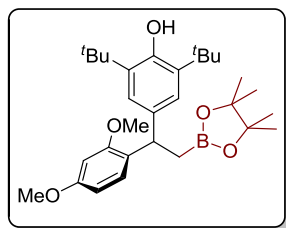

<sup>1</sup>H NMR (500 MHz, CDCl<sub>3</sub>) δ 7.11 (s, 2H), 6.88 (d, *J* = 2.1 Hz, 1H), 6.86 (dd, *J* = 8.2, 2.1 Hz, 1H), 6.79 (d, *J* = 8.2 Hz, 1H), 5.01 (s, 1H), 4.14 (t, *J* = 8.6 Hz, 1H), 3.87 (s, 3H), 3.85 (s, 3H), 1.59 (dd, *J* = 8.6, 1.7 Hz, 2H), 1.42 (s, 18H), 1.05 (s, 12H).

<sup>13</sup>C NMR (125 MHz, CDCl<sub>3</sub>) δ 151.8, 148.4, 146.9, 140.0, 137.1, 135.3, 124.0, 119.3, 111.1, 111.0, 82.9, 55.9, 55.7, 46.3, 34.3, 30.3,

24.59, 24.55.

<sup>11</sup>B NMR (160 MHz, CDCl<sub>3</sub>) δ 33.86.

HRMS: (ESI<sup>+</sup>) [M+Na]<sup>+</sup> calcd for C<sub>30</sub>H<sub>45</sub>BO<sub>5</sub>Na: 519.3252, found: 519.3259.

**2,6-di-tert-butyl-4-(1-(2,4-dimethylphenyl)-2-(4,4,5,5-tetramethyl-1,3,2-dioxaborolan-2-ylethyl)phenol (3y)**

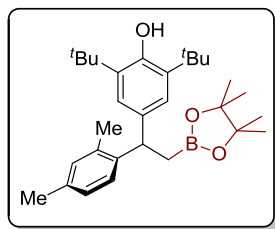

$^1\text{H NMR}$  (500 MHz,  $\text{CDCl}_3$ )  $\delta$  7.30 – 7.25 (m, 1H), 7.09 (s, 2H), 6.99 (dd,  $J = 7.9, 1.9$  Hz, 1H), 6.91 (d,  $J = 1.9$  Hz, 1H), 4.97 (s, 1H), 4.36 (t,  $J = 8.6$  Hz, 1H), 2.37 (s, 3H), 2.27 (s, 3H), 1.58 (d,  $J = 8.6$  Hz, 2H), 1.41 (s, 18H), 1.04 (s, 6H), 1.02 (s, 6H).

$^{13}\text{C NMR}$  (125 MHz,  $\text{CDCl}_3$ )  $\delta$  151.6, 142.1, 136.9, 135.4, 135.1, 134.7, 130.8, 126.5, 126.4, 124.3, 82.9, 41.7, 34.3, 30.3, 24.6, 24.5,

20.8, 20.0.

$^{11}\text{B NMR}$  (160 MHz,  $\text{CDCl}_3$ )  $\delta$  35.21.

**HRMS:** (ESI<sup>+</sup>)  $[\text{M}+\text{Na}]^+$  calcd for  $\text{C}_{30}\text{H}_{45}\text{BO}_3\text{Na}$ : 487.3354, found: 487.3360.

**2,6-di-tert-butyl-4-(1-(2,3-dihydrobenzo[b][1,4]dioxin-7-yl)-2-(4,4,5,5-tetramethyl-1,3,2-dioxaborolan-2-yl)ethyl)phenol (3z)**

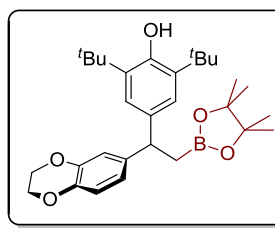

$^1\text{H NMR}$  (500 MHz,  $\text{CDCl}_3$ )  $\delta$  7.09 (s, 2H), 6.83 – 6.78 (m, 2H), 6.77 – 6.74 (m, 1H), 5.00 (s, 1H), 4.27 – 4.20 (m, 4H), 4.08 (t,  $J = 8.6$  Hz, 1H), 1.55 (dd,  $J = 8.6, 6.2$  Hz, 2H), 1.42 (s, 18H), 1.06 (s, 6H), 1.04 (s, 6H).

$^{13}\text{C NMR}$  (125 MHz,  $\text{CDCl}_3$ )  $\delta$  151.8, 143.0, 141.4, 141.1, 136.9, 135.3, 124.1, 120.3, 116.7, 116.2, 82.9, 64.4, 64.3, 46.0, 34.3, 30.3,

24.6, 24.5.

$^{11}\text{B NMR}$  (160 MHz,  $\text{CDCl}_3$ )  $\delta$  33.45.

**HRMS:** (ESI<sup>+</sup>)  $[\text{M}+\text{Na}]^+$  calcd for  $\text{C}_{30}\text{H}_{43}\text{BO}_5\text{Na}$ : 517.3096, found: 517.3102.

**2,6-di-tert-butyl-4-(1-(naphthalen-2-yl)-2-(4,4,5,5-tetramethyl-1,3,2-dioxaborolan-2-yl)ethyl)phenol (3aa)**

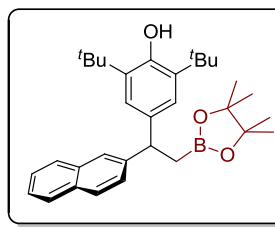

$^1\text{H NMR}$  (500 MHz,  $\text{CDCl}_3$ )  $\delta$  7.84 – 7.80 (m, 1H), 7.79 (dd,  $J = 8.0, 1.3$  Hz, 1H), 7.78 – 7.76 (m, 1H), 7.74 (d,  $J = 8.5$  Hz, 1H), 7.48 – 7.39 (m, 3H), 7.16 (s, 2H), 5.03 (s, 1H), 4.38 (t,  $J = 8.5$  Hz, 1H), 1.71 (dd,  $J = 8.5, 5.3$  Hz, 2H), 1.43 (s, 18H), 1.03 (s, 6H), 1.03 (s, 6H).

$^{13}\text{C NMR}$  (125 MHz,  $\text{CDCl}_3$ )  $\delta$  151.9, 144.8, 136.8, 135.4, 133.5, 132.0, 127.7, 127.7, 127.5, 126.8, 125.6, 125.2, 125.0, 124.3, 83.0, 46.7, 34.3, 30.3, 24.57, 24.55.

$^{11}\text{B NMR}$  (160 MHz,  $\text{CDCl}_3$ )  $\delta$  34.99.

**HRMS:** (ESI<sup>+</sup>)  $[\text{M}+\text{Na}]^+$  calcd for  $\text{C}_{32}\text{H}_{43}\text{BO}_3\text{Na}$ : 503.3197, found: 503.3202.

**2,6-di-tert-butyl-4-(1-(naphthalen-1-yl)-2-(4,4,5,5-tetramethyl-1,3,2-dioxaborolan-2-yl)ethyl)phenol (3ab)**

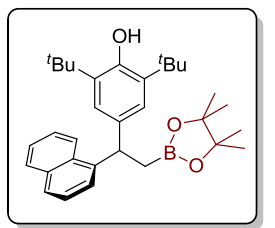

$^1\text{H NMR}$  (500 MHz,  $\text{CDCl}_3$ )  $\delta$  8.35 (d,  $J = 8.5$  Hz, 1H), 7.84 (dd,  $J = 8.2, 1.4$  Hz, 1H), 7.70 (d,  $J = 7.9$  Hz, 1H), 7.54 – 7.48 (m, 2H), 7.48 – 7.41 (m, 2H), 7.18 (s, 2H), 5.05 (t,  $J = 8.5$  Hz, 1H), 5.00 (s, 1H), 1.76 (dd,  $J = 15.3, 8.5$  Hz, 1H), 1.70 (dd,  $J = 15.3, 8.5$  Hz, 1H), 1.40 (s, 18H), 1.02 (s, 6H), 0.97 (s, 6H).

$^{13}\text{C NMR}$  (125 MHz,  $\text{CDCl}_3$ )  $\delta$  151.8, 143.2, 136.6, 135.2, 133.9, 131.7, 128.6, 126.4, 125.5, 125.4, 125.1, 124.5, 124.2, 124.1, 82.9, 41.5, 34.3, 30.3, 24.50, 24.47.

**HRMS:** (ESI<sup>+</sup>)  $[\text{M}+\text{Na}]^+$  calcd for  $\text{C}_{32}\text{H}_{43}\text{BO}_3\text{Na}$ : 503.3197, found: 503.3206.

$^{11}\text{B NMR}$  (160 MHz,  $\text{CDCl}_3$ )  $\delta$  34.86.

**2,6-di-*tert*-butyl-4-(1-(6-methoxynaphthalen-2-yl)-2-(4,4,5,5-tetramethyl-1,3,2-dioxaborolan-2-yl)ethyl)phenol (3ac)**

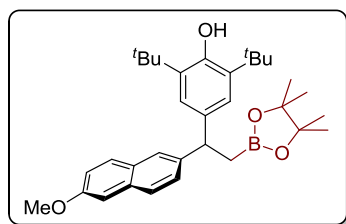

$^1\text{H NMR}$  (500 MHz,  $\text{CDCl}_3$ )  $\delta$  7.70 (d,  $J = 9.1$  Hz, 1H), 7.69 (d,  $J = 2.4$  Hz, 1H), 7.64 (d,  $J = 8.5$  Hz, 1H), 7.40 (dd,  $J = 8.5$ , 1.8 Hz, 1H), 7.15 (s, 2H), 7.12 (dd,  $J = 8.8$ , 2.5 Hz, 1H), 7.10 (d,  $J = 2.5$  Hz, 1H), 5.02 (s, 1H), 4.34 (t,  $J = 8.6$  Hz, 1H), 3.92 (s, 3H), 1.68 (dd,  $J = 8.6$ , 7.2 Hz, 2H), 1.42 (s, 18H), 1.03 (s, 12H).

$^{13}\text{C NMR}$  (125 MHz,  $\text{CDCl}_3$ )  $\delta$  157.1, 151.8, 142.5, 137.0, 135.3, 132.9, 129.2, 129.0, 127.3, 126.6, 125.1, 124.3, 118.3, 105.6, 83.0, 55.2, 46.5, 34.3, 30.3, 24.58, 24.56.

$^{11}\text{B NMR}$  (160 MHz,  $\text{CDCl}_3$ )  $\delta$  34.35.

**HRMS:** (ESI<sup>+</sup>) [ $\text{M}+\text{Na}$ ]<sup>+</sup> calcd for  $\text{C}_{33}\text{H}_{45}\text{BO}_4\text{Na}$ : 539.3303, found: 539.3300.

**2,6-di-*tert*-butyl-4-(1-(quinoline-2-yl)-2-(4,4,5,5-tetramethyl-1,3,2-dioxaborolan-2-yl)ethyl)phenol (3ad)**

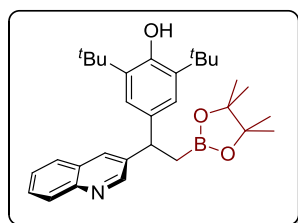

$^1\text{H NMR}$  (500 MHz,  $\text{CDCl}_3$ )  $\delta$  8.89 (d,  $J = 2.3$  Hz, 1H), 8.06 (d,  $J = 8.4$  Hz, 1H), 8.02 (d,  $J = 2.2$  Hz, 1H), 7.79 (dd,  $J = 8.2$ , 1.4 Hz, 1H), 7.65 (ddd,  $J = 8.4$ , 6.9, 1.5 Hz, 1H), 7.52 (ddd,  $J = 8.1$ , 6.8, 1.2 Hz, 1H), 7.14 (s, 2H), 5.08 (s, 1H), 4.42 (t,  $J = 8.5$  Hz, 1H), 1.72 (d,  $J = 8.5$  Hz, 2H), 1.42 (s, 18H), 1.04 (s, 6H), 1.04 (s, 6H).

$^{13}\text{C NMR}$  (125 MHz,  $\text{CDCl}_3$ )  $\delta$  152.2, 152.0, 146.5, 140.1, 135.8,

135.5, 132.7, 128.9, 128.5, 128.1, 127.6, 126.4, 124.2, 83.2, 44.3, 34.3, 30.3, 24.58, 24.56.

$^{11}\text{B NMR}$  (160 MHz,  $\text{CDCl}_3$ )  $\delta$  33.50.

**HRMS:** (ESI<sup>+</sup>) [ $\text{M}+\text{Na}$ ]<sup>+</sup> calcd for  $\text{C}_{31}\text{H}_{42}\text{BO}_4\text{Na}$ : 510.3150, found: 510.3153.

**2,6-di-*tert*-butyl-4-(1-(pyridin-3-yl)-2-(4,4,5,5-tetramethyl-1,3,2-dioxaborolan-2-yl)ethyl)phenol (3ae)**

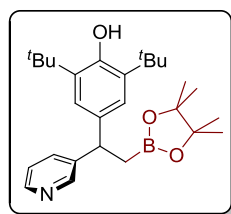

$^1\text{H NMR}$  (500 MHz,  $\text{CDCl}_3$ )  $\delta$  8.59 (d,  $J = 2.3$  Hz, 1H), 8.41 (dd,  $J = 4.9$ , 1.6 Hz, 1H), 7.59 (dt,  $J = 7.9$ , 2.0 Hz, 1H), 7.20 (ddd,  $J = 7.9$ , 4.8, 0.9 Hz, 1H), 7.08 (s, 2H), 5.07 (s, 1H), 4.22 (t,  $J = 8.6$  Hz, 1H), 1.61 (dd,  $J = 8.6$ , 3.3 Hz, 2H), 1.42 (s, 18H), 1.06 (s, 6H), 1.05 (s, 6H).

$^{13}\text{C NMR}$  (125 MHz,  $\text{CDCl}_3$ )  $\delta$  152.1, 149.4, 147.1, 142.5, 135.7, 135.6, 134.8, 124.1, 123.2, 83.2, 44.2, 34.3, 30.3, 24.6, 24.5.

$^{11}\text{B NMR}$  (160 MHz,  $\text{CDCl}_3$ )  $\delta$  33.86.

**HRMS:** (ESI<sup>+</sup>) [ $\text{M}+\text{Na}$ ]<sup>+</sup> calcd for  $\text{C}_{27}\text{H}_{40}\text{BNO}_3\text{Na}$ : 460.2993, found: 460.2998.

**4-(1-(benzo[*b*]thiophen-2-yl)-2-(4,4,5,5-tetramethyl-1,3,2-dioxaborolan-2-yl)ethyl)-2,6-di-*tert*-butylphenol (3af)**

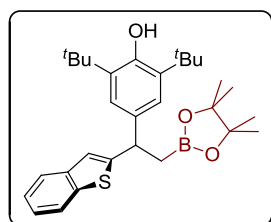

$^1\text{H NMR}$  (500 MHz,  $\text{CDCl}_3$ )  $\delta$  7.84 (ddd,  $J = 7.3$ , 5.5, 1.6 Hz, 2H), 7.36 – 7.29 (m, 2H), 7.24 (d,  $J = 0.9$  Hz, 1H), 7.16 (s, 2H), 5.01 (s, 1H), 4.55 (t,  $J = 8.5$  Hz, 1H), 1.76 (dd,  $J = 15.3$ , 8.5 Hz, 1H), 1.66 (dd,  $J = 15.3$ ,  $J = 8.5$  Hz, 1H), 1.41 (s, 18H), 1.08 (s, 6H), 1.01 (s, 6H).

$^{13}\text{C NMR}$  (125 MHz,  $\text{CDCl}_3$ )  $\delta$  151.9, 142.3, 140.6, 138.7, 135.7,

135.4, 124.2, 123.9, 123.5, 122.6, 122.6, 120.9, 83.0, 40.7, 34.3, 30.3, 24.6, 24.5.

$^{11}\text{B NMR}$  (160 MHz,  $\text{CDCl}_3$ )  $\delta$  33.4.

**HRMS:** (ESI<sup>+</sup>) [ $\text{M}+\text{Na}$ ]<sup>+</sup> calcd for  $\text{C}_{30}\text{H}_{41}\text{BO}_3\text{SNa}$ : 515.2762, found: 515.2768.

**2,6-di-tert-butyl-4-(2-(4,4,5,5-tetramethyl-1,3,2-dioxaborolan-2-yl)-1-(thiophen-2-yl)ethyl)phenol (3ag)**

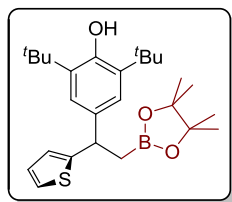

$^1\text{H NMR}$  (500 MHz,  $\text{CDCl}_3$ )  $\delta$  7.14 (s, 2H), 7.10 (dd,  $J = 5.1, 1.2$  Hz, 1H), 6.89 (dd,  $J = 5.1, 3.5$  Hz, 1H), 6.82 (dt,  $J = 3.5, 1.2$  Hz, 1H), 5.04 (s, 1H), 4.41 (t,  $J = 8.5$  Hz, 1H), 1.69 (dd,  $J = 15.2, 8.5$  Hz, 1H), 1.63 (dd,  $J = 15.2, 8.5$  Hz, 1H), 1.43 (s, 18H), 1.07 (s, 12H).

$^{13}\text{C NMR}$  (125 MHz,  $\text{CDCl}_3$ )  $\delta$  152.4, 152.1, 136.5, 135.4, 126.3, 124.0, 123.1, 122.9, 83.1, 42.3, 34.3, 30.3, 24.59, 24.56.

$^{11}\text{B NMR}$  (160 MHz,  $\text{CDCl}_3$ )  $\delta$  33.71.

**HRMS:** (ESI<sup>+</sup>)  $[M+\text{Na}]^+$  calcd for  $\text{C}_{26}\text{H}_{39}\text{O}_3\text{SNa}$ : 465.2605, found: 465.2613.

**4-(1-(benzo[b]furan-2-yl)-2-(4,4,5,5-tetramethyl-1,3,2-dioxaborolan-2-yl)ethyl)-2,6-di-tert-butylphenol (3ah)**

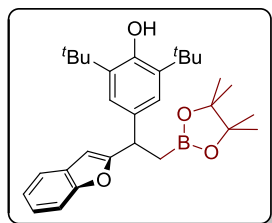

$^1\text{H NMR}$  (500 MHz,  $\text{CDCl}_3$ )  $\delta$  7.51 – 7.45 (m, 1H), 7.43 – 7.38 (m, 1H), 7.23 – 7.14 (m, 2H), 7.17 (s, 2H), 6.37 (d,  $J = 1.0$  Hz, 1H), 5.08 (s, 1H), 4.31 (t,  $J = 8.3$  Hz, 1H), 1.72 (dd,  $J = 15.4, 8.3$  Hz, 1H), 1.56 (dd,  $J = 15.4, 8.3$  Hz, 1H), 1.44 (s, 18H), 1.13 (s, 6H), 1.11 (s, 6H).

$^{13}\text{C NMR}$  (125 MHz,  $\text{CDCl}_3$ )  $\delta$  163.5, 154.8, 152.4, 135.5, 133.9, 128.9, 124.4, 123.0, 122.2, 120.3, 110.9, 101.5, 83.2, 41.0, 34.4, 30.3,

24.7, 24.6.

$^{11}\text{B NMR}$  (160 MHz,  $\text{CDCl}_3$ )  $\delta$  33.51.

**HRMS:** (ESI<sup>+</sup>)  $[M+\text{Na}]^+$  calcd for  $\text{C}_{30}\text{H}_{41}\text{BO}_4\text{Na}$ : 499.2990, found: 499.2997.

**2,6-di-tert-butyl-4-(1-(4,4,5,5-tetramethyl-1,3,2-dioxaborolan-2-yl)propan-2-yl)phenol (3ai)**

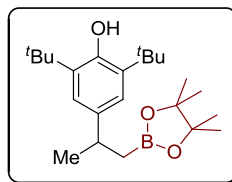

$^1\text{H NMR}$  (500 MHz,  $\text{CDCl}_3$ )  $\delta$  7.06 (s, 2H), 5.01 (s, 1H), 2.98 (dp,  $J = 8.7, 6.9$  Hz, 1H), 1.45 (s, 18H), 1.28 (d,  $J = 6.9$  Hz, 3H), 1.18 (s, 12H), 1.16 (d,  $J = 8.7$  Hz, 2H).

$^{13}\text{C NMR}$  (125 MHz,  $\text{CDCl}_3$ )  $\delta$  151.6, 139.7, 135.3, 123.1, 82.9, 35.7, 34.4, 30.4, 25.3, 24.8, 24.7.

$^{11}\text{B NMR}$  (160 MHz,  $\text{CDCl}_3$ )  $\delta$  33.99.

**HRMS:** (ESI<sup>+</sup>)  $[M+\text{Na}]^+$  calcd for  $\text{C}_{23}\text{H}_{39}\text{BO}_3\text{Na}$ : 397.2884, found: 397.2887.

**2,6-diisopropyl-4-(1-(4-methoxyphenyl)-2-(4,4,5,5-tetramethyl-1,3,2-dioxaborolan-2-yl)ethyl)phenol (3aj)**

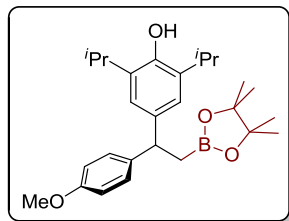

$^1\text{H NMR}$  (500 MHz,  $\text{CDCl}_3$ )  $\delta$  7.20 (d,  $J = 8.7$  Hz, 2H), 6.97 (s, 2H), 6.81 (d,  $J = 8.7$  Hz, 2H), 4.63 (s, 1H), 4.17 (t,  $J = 8.6$  Hz, 1H), 3.78 (s, 3H), 3.12 (hept,  $J = 6.9$  Hz, 2H), 1.58 (d,  $J = 8.6$  Hz, 2H), 1.25 (d,  $J = 6.9$  Hz, 6H), 1.24 (d,  $J = 6.9$  Hz, 7H), 1.07 (s, 6H), 1.05 (s, 6H).

$^{13}\text{C NMR}$  (125 MHz,  $\text{CDCl}_3$ )  $\delta$  157.5, 148.0, 139.6, 138.6, 133.1,

128.4, 122.6, 113.5, 83.0, 55.2, 45.6, 27.3, 24.7, 24.6, 24.5, 22.8, 22.7.

$^{11}\text{B NMR}$  (160 MHz,  $\text{CDCl}_3$ )  $\delta$  33.89.

**HRMS:** (ESI<sup>+</sup>)  $[M+\text{Na}]^+$  calcd for  $\text{C}_{27}\text{H}_{39}\text{BO}_4\text{Na}$ : 461.2834, found: 461.2834.

**2,6-di-tert-butyl-4-(2-methyl-1-(4,4,5,5-tetramethyl-1,3,2-dioxaborolan-2-yl)butan-2-yl)phenol (5a)**

$^1\text{H NMR}$  (500 MHz,  $\text{CDCl}_3$ )  $\delta$  7.14 (s, 2H), 4.98 (s, 1H), 1.68 (dh,  $J = 20.9, 7.4$  Hz, 3H), 1.45

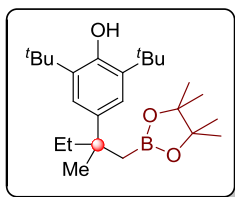

(s, 18H), 1.40 (s, 3H), 1.30 (d,  $J = 14.9$  Hz, 2H), 1.15 (d,  $J = 14.9$  Hz, 1H), 1.10 (s, 6H), 1.06 (s, 6H), 0.72 (t,  $J = 7.4$  Hz, 3H).

$^{13}\text{C}$  NMR (125 MHz,  $\text{CDCl}_3$ )  $\delta$  151.1, 139.9, 134.4, 122.8, 82.5, 39.3, 38.0, 34.5, 30.5, 26.5, 24.8, 24.5, 9.2.

$^{11}\text{B}$  NMR (160 MHz,  $\text{CDCl}_3$ )  $\delta$  33.57.

**HRMS:** (ESI<sup>+</sup>) [ $\text{M}+\text{Na}$ ]<sup>+</sup> calcd for  $\text{C}_{25}\text{H}_{43}\text{BO}_3\text{Na}$ : 425.3197, found: 425.3192.

## V. Synthesis of compound 7

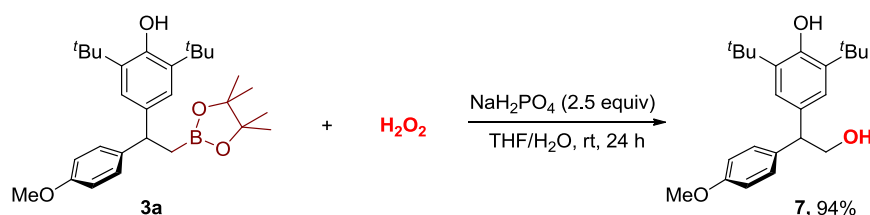

To a solution **3a** (23.3 mg, 0.05 mmol) in anhydrous THF (0.5 mL) was added a solution of  $\text{NaH}_2\text{PO}_4$  (15.0 mg, 0.125 mmol, 2.5 equiv) in water (0.5 mL). The reaction mixture was then cooled to 0 °C and  $\text{H}_2\text{O}_2$  (30% wt% in  $\text{H}_2\text{O}$ , 0.5 mL) was added. After stirring at room temperature for additional 24 hours, the reaction was quenched with saturated  $\text{NH}_4\text{Cl}$  and extracted with ethyl acetate ( $3 \times 10$  mL). The combined organic layers were dried with  $\text{Na}_2\text{SO}_4$ , filtered, and concentrated under reduced pressure. The residue was purified by silica gel column chromatography (petroleum ether/ethyl acetate = 3/1) to afford the pure product.

### 2,6-di-tert-butyl-4-(2-hydroxy-1-(4-methoxyphenyl)ethyl)phenol (**7**)

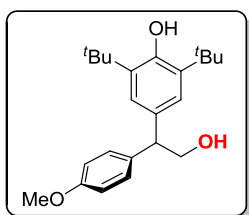

$^1\text{H}$  NMR (500 MHz,  $\text{CDCl}_3$ )  $\delta$  7.23 (d,  $J = 8.7$  Hz, 2H), 7.07 (s, 2H), 6.90 (d,  $J = 8.7$  Hz, 2H), 5.14 (s, 1H), 4.10 (d,  $J = 1.6$  Hz, 3H), 3.82 (s, 3H), 1.51 (b, 1H), 1.44 (s, 18H).

$^{13}\text{C}$  NMR (125 MHz,  $\text{CDCl}_3$ )  $\delta$  158.3, 152.5, 136.0, 133.9, 131.8, 129.2, 124.7, 114.0, 66.7, 55.2, 52.9, 34.4, 30.3.

**HRMS:** (ESI<sup>+</sup>) [ $\text{M}+\text{Na}$ ]<sup>+</sup> calcd for  $\text{C}_{23}\text{H}_{32}\text{O}_3\text{Na}$ : 379.2244, found: 379.2249.

## VI. Synthesis of compound 9

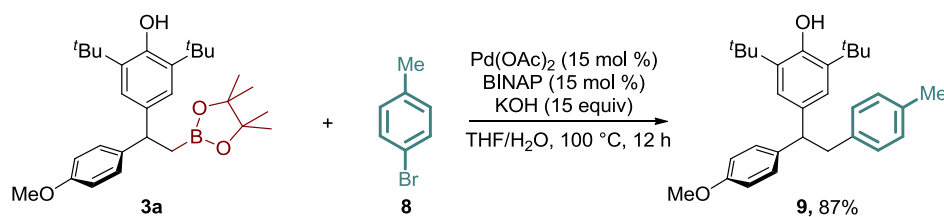

An oven-dried Schlenk tube was charged with compound **3a** (23.3 mg, 0.05 mmol), Pd(OAc)<sub>2</sub> (1.7 mg, 15 mol %), BINAP (4.7 mg, 15 mol %), and KOH (42.0 mg, 0.75 mol, 15 equiv). The tube was sealed, degassed and refilled with N<sub>2</sub> for 3 times. Then a solution of 1-bromo-4-methylbenzene (25.7 mg, 0.15 mmol, 3 equiv) in THF (1.0 mL) and water (0.1 mL) were injected into the tube via syringes. The tube was heated at 100 °C for 12 hours. After completion, the reaction mixture was filtered through a pad of Celite and Na<sub>2</sub>SO<sub>4</sub>. The filtrate was washed with ethyl acetate for 3 times (3 × 10 mL). The combined organic solvents were concentrated under reduced pressure. The residue was purified by silica gel column chromatography (petroleum ether/ethyl acetate = 20/1) to afford the pure product.

**2,6-di-*tert*-butyl-4-(1-(4-methoxyphenyl)-2-(*p*-tolyl)ethyl)phenol (9)**

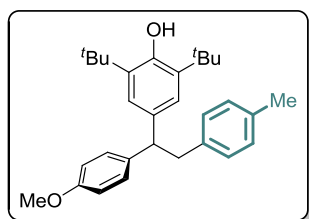

<sup>1</sup>H NMR (500 MHz, CDCl<sub>3</sub>) δ 7.15 (d, *J* = 8.7 Hz, 2H), 7.00 (d, *J* = 7.8 Hz, 2H), 6.97 (s, 2H), 6.89 (d, *J* = 7.8 Hz, 2H), 6.82 (d, *J* = 8.7 Hz, 2H), 5.04 (s, 1H), 4.08 (t, *J* = 7.8 Hz, 1H), 3.80 (s, 3H), 3.25 (qd, *J* = 13.5, 7.8 Hz, 2H), 2.30 (s, 3H), 1.41 (s, 18H).

<sup>13</sup>C NMR (125 MHz, CDCl<sub>3</sub>) δ 157.7, 151.8, 137.7, 137.1, 135.6, 135.3, 135.0, 129.0, 129.0, 128.6, 124.4, 113.5, 55.2, 52.4, 42.7,

34.3, 30.3, 21.0.

HRMS: (ESI<sup>+</sup>) [M+Na]<sup>+</sup> calcd for C<sub>30</sub>H<sub>38</sub>O<sub>2</sub>Na: 453.2764, found: 453.2766.

## VII. NMR Spectra

Please refer to next pages



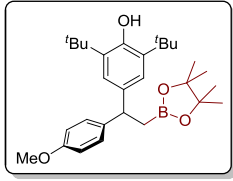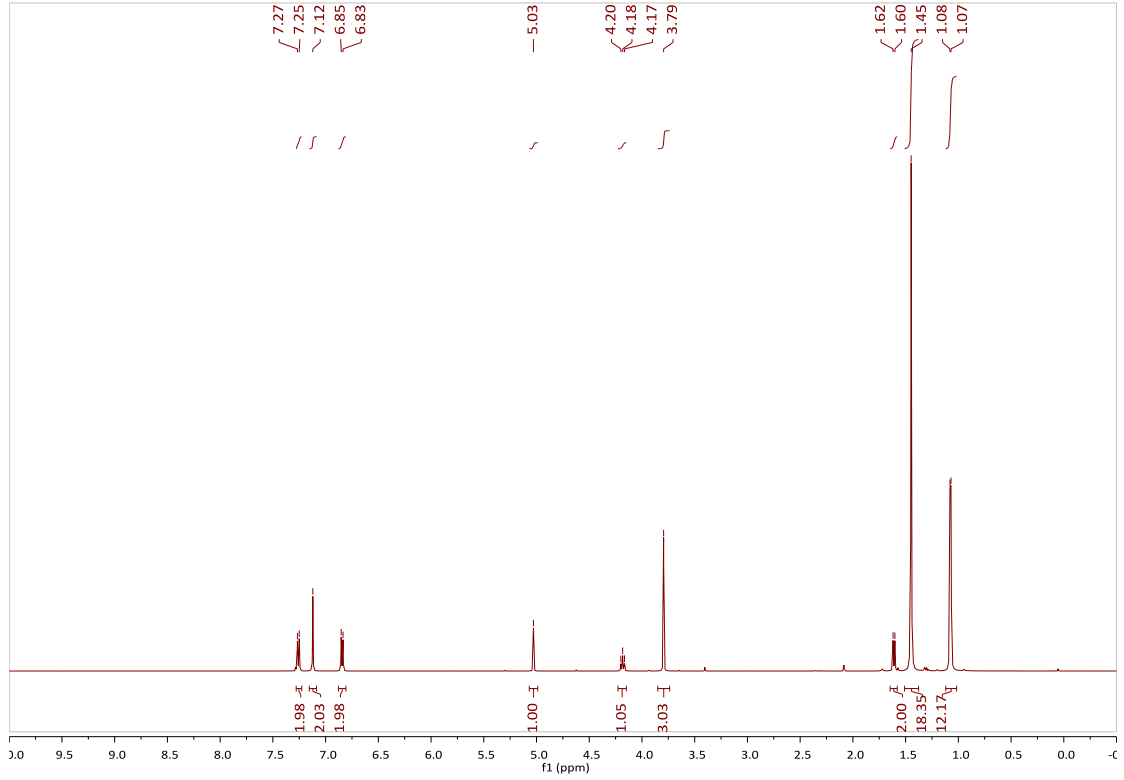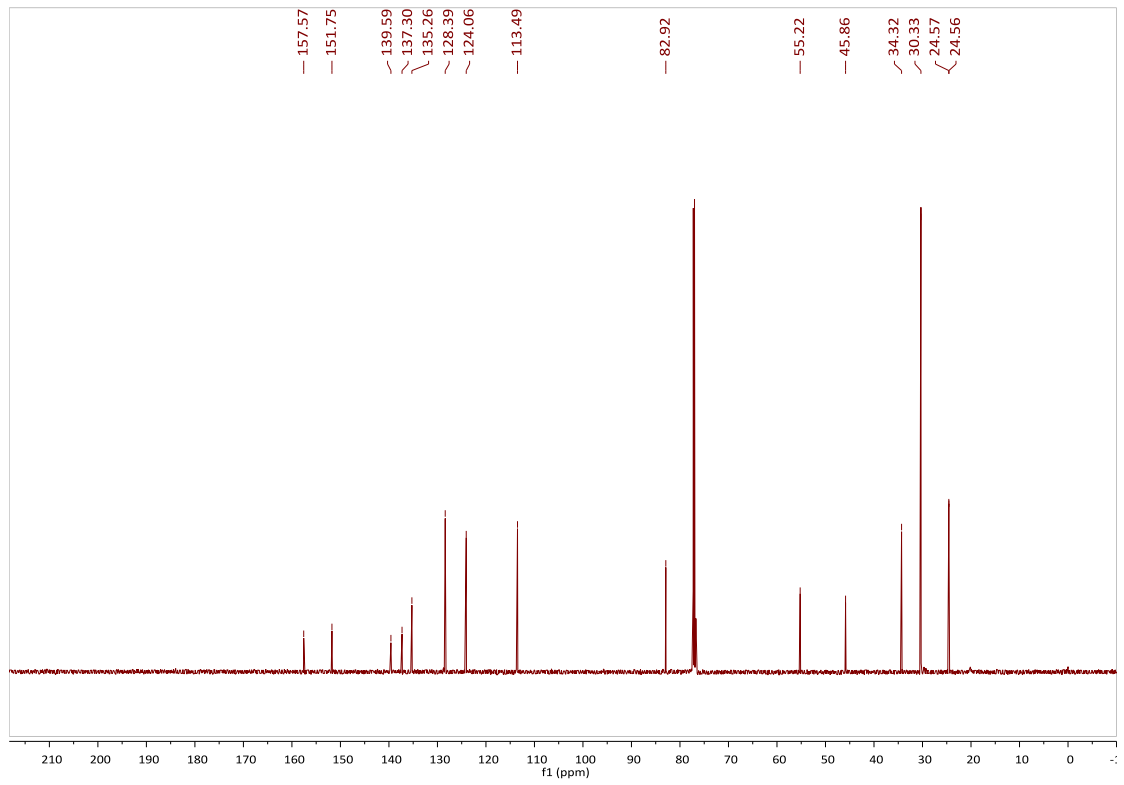

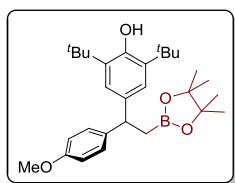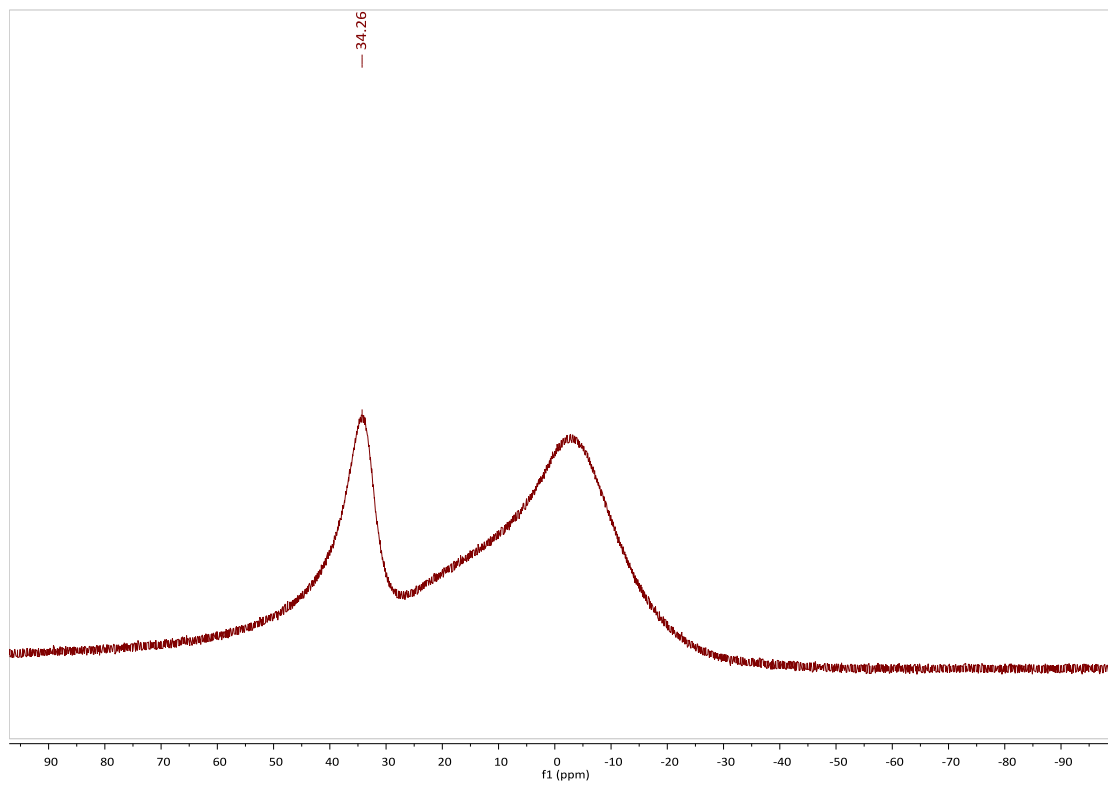

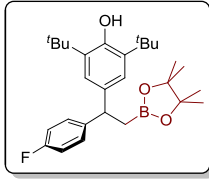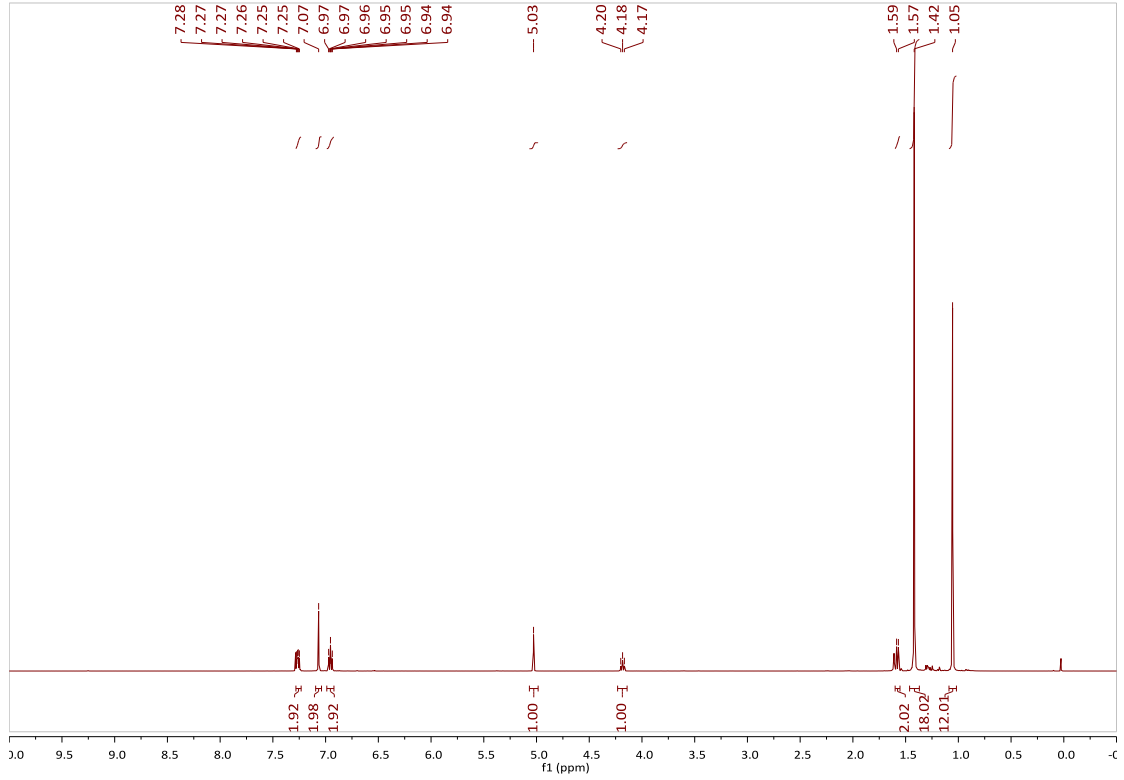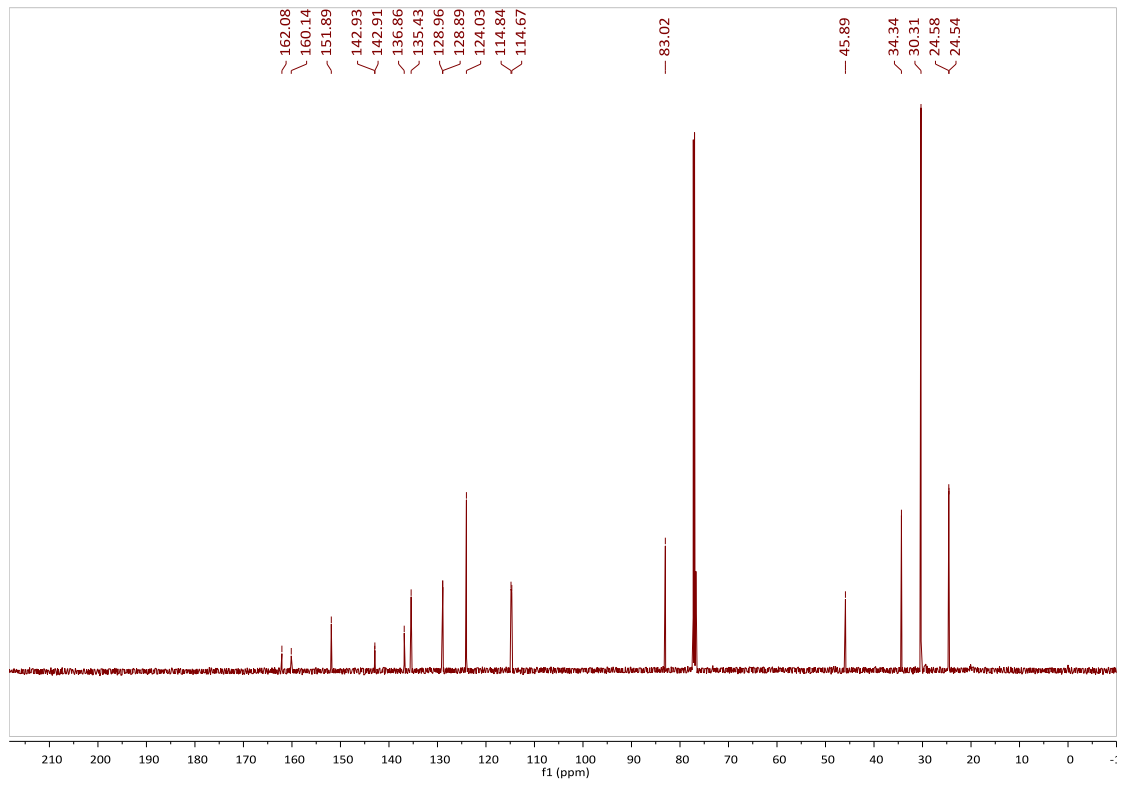

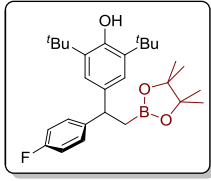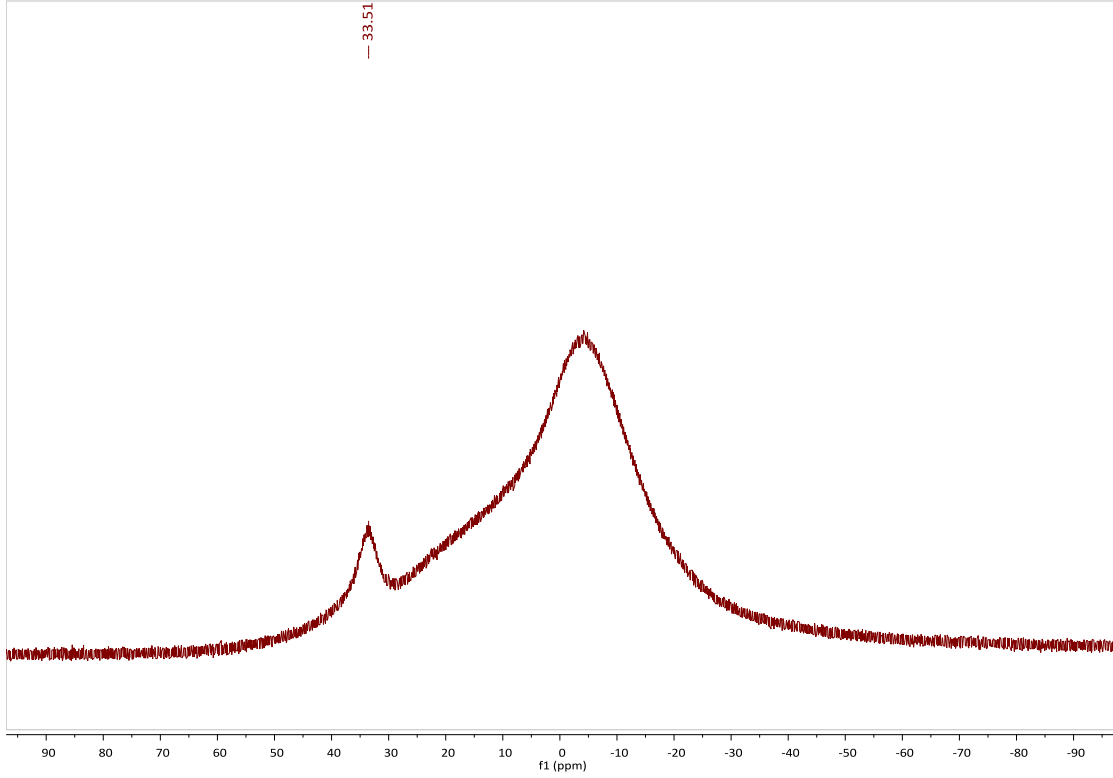

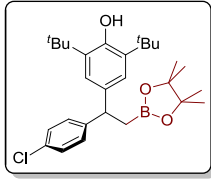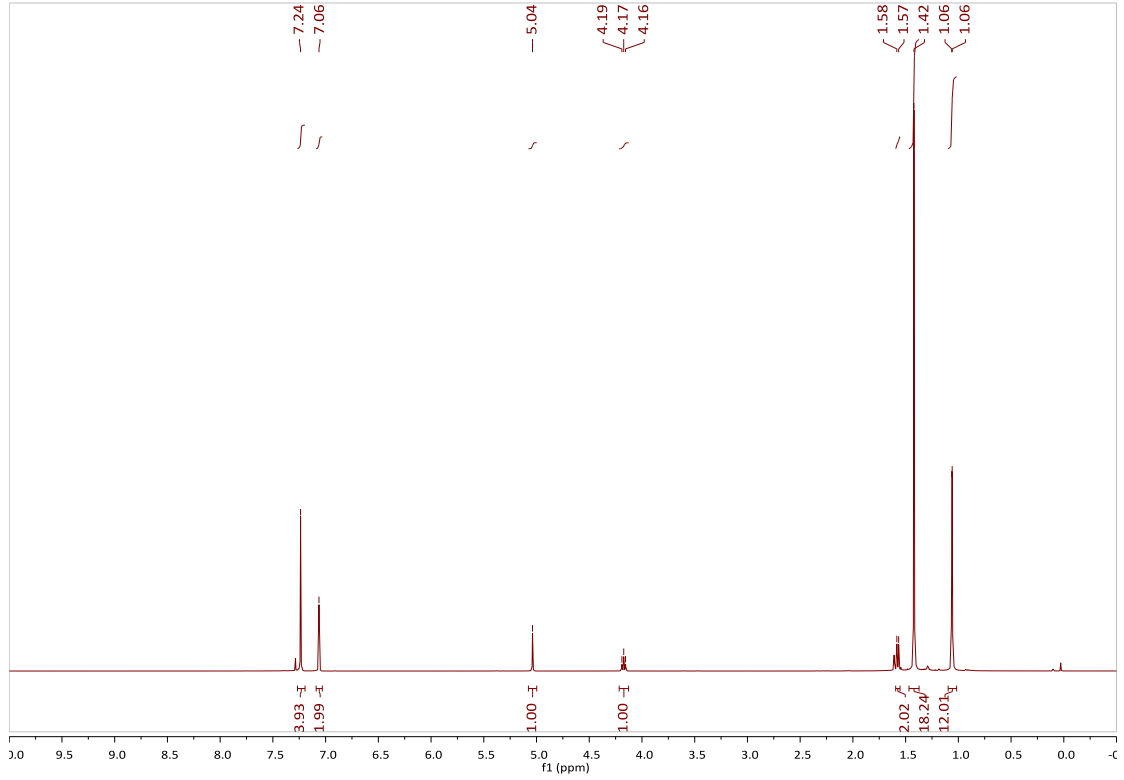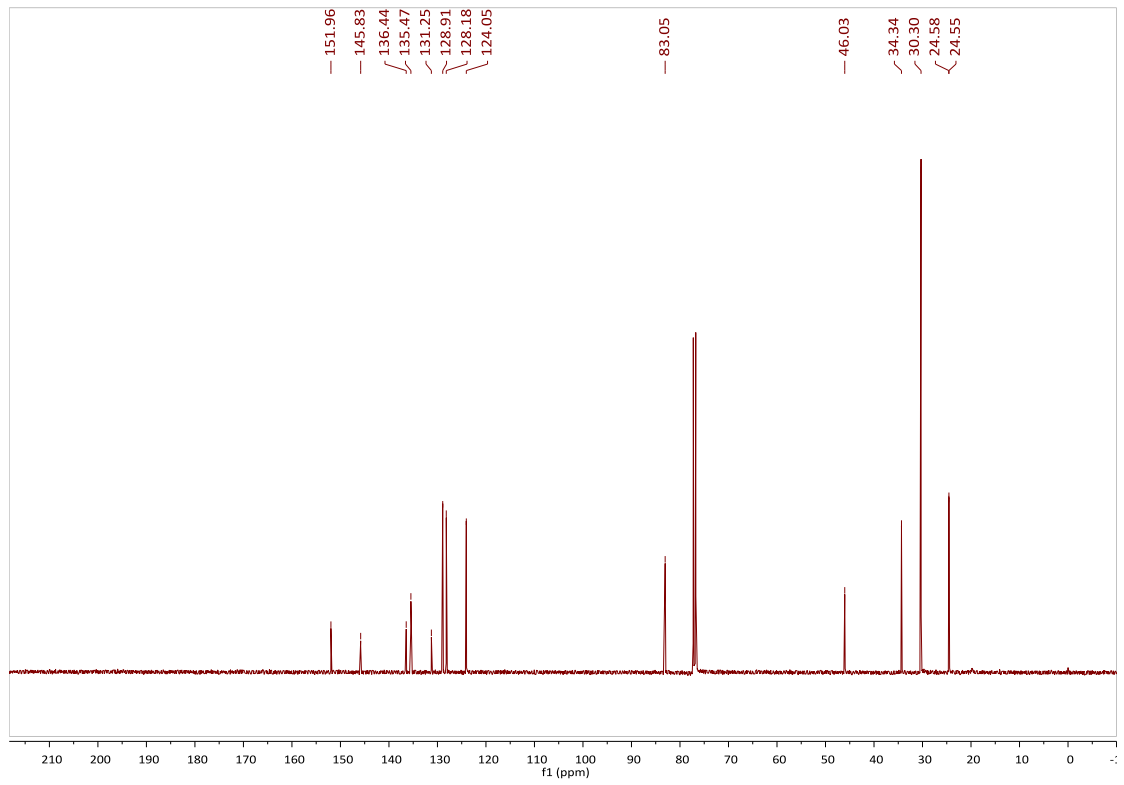

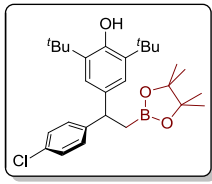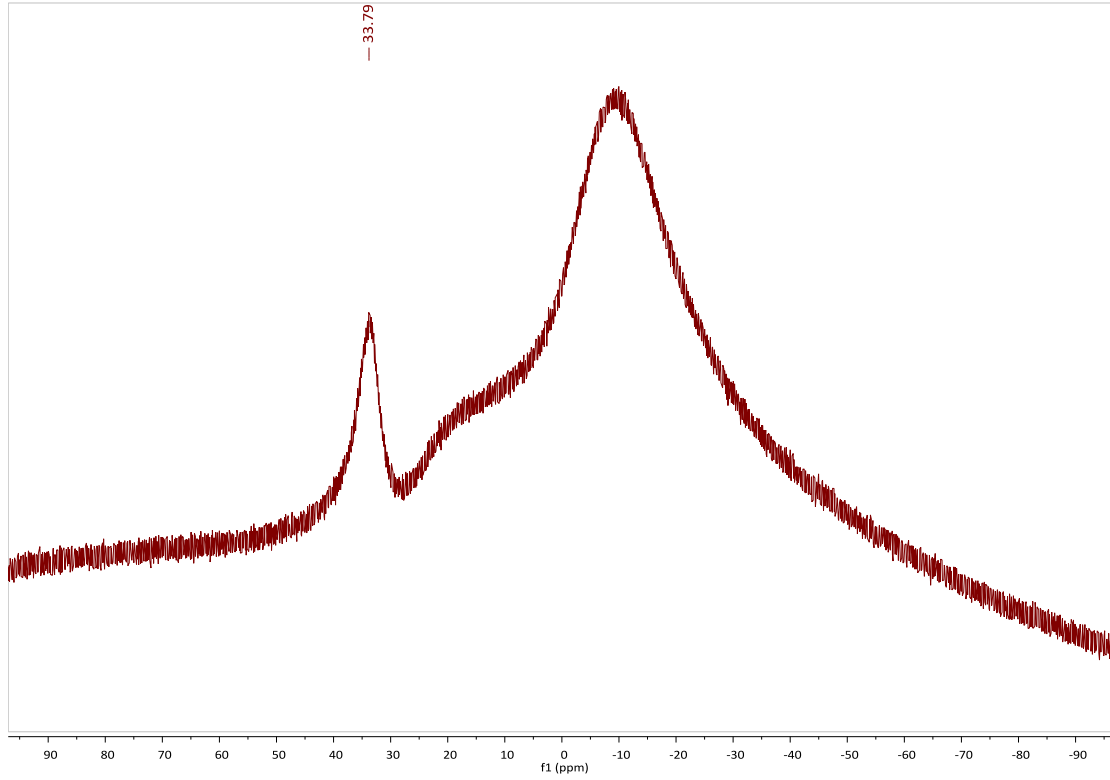

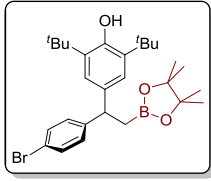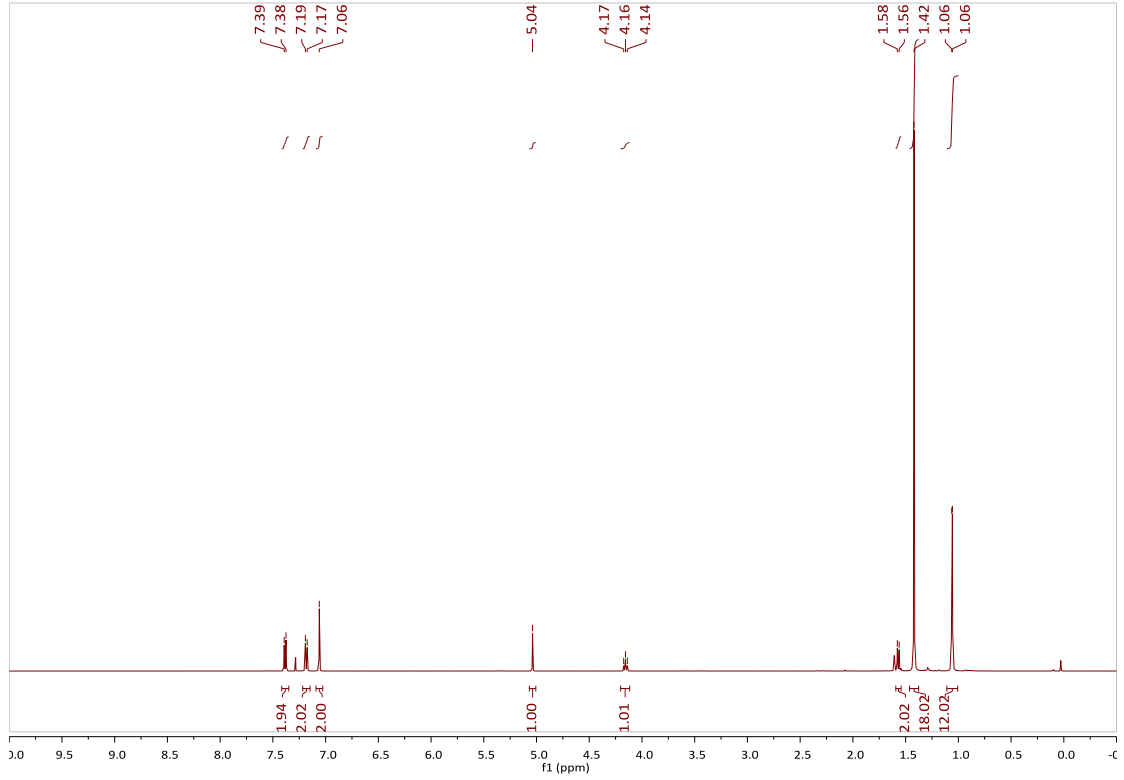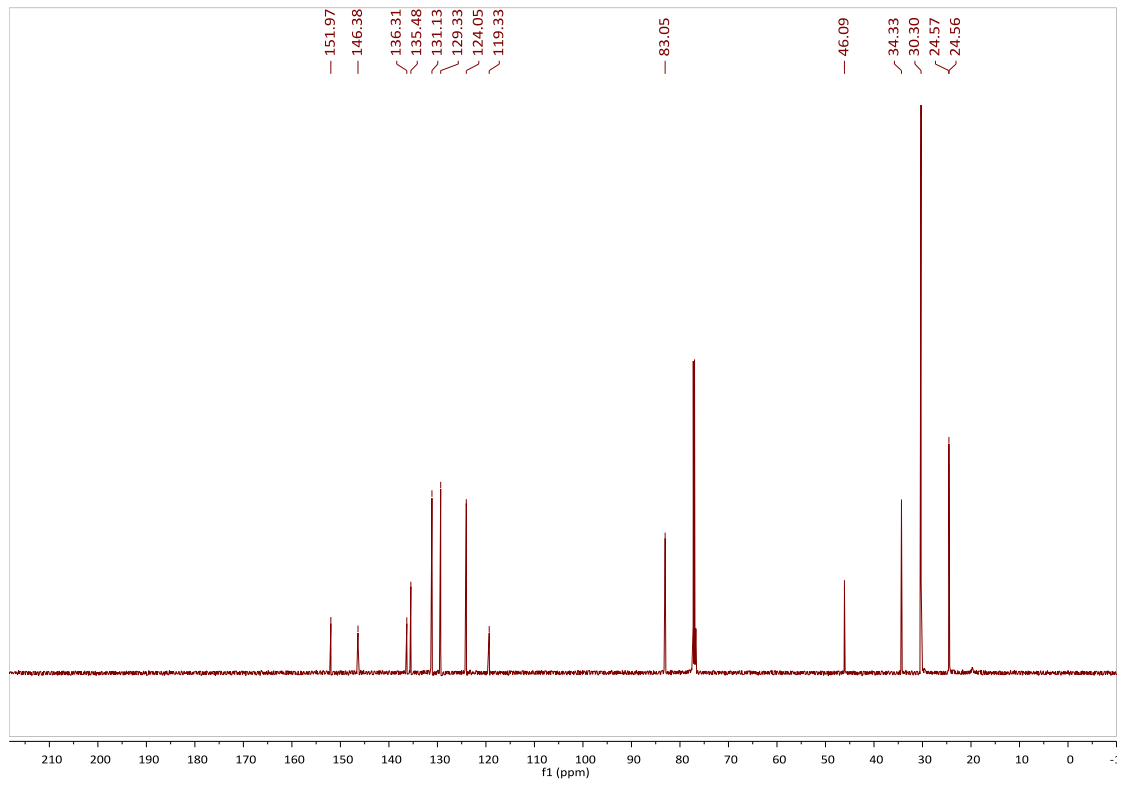

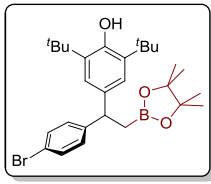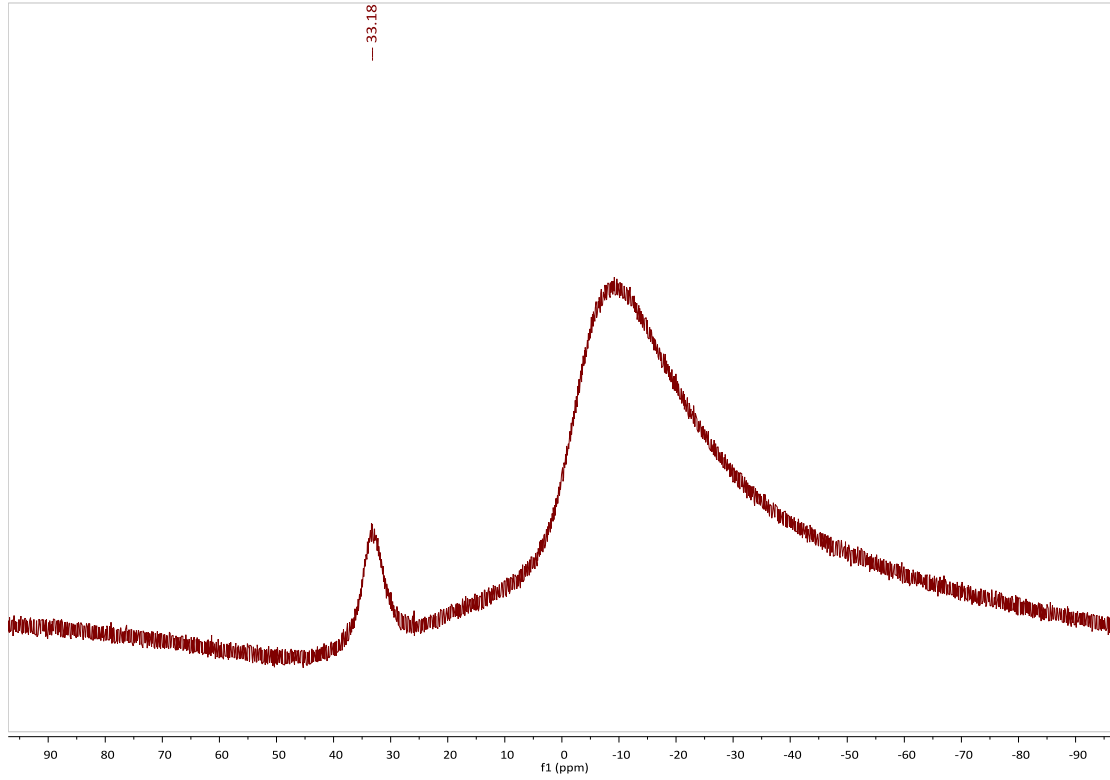



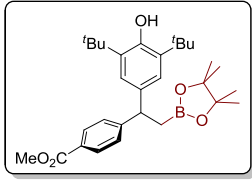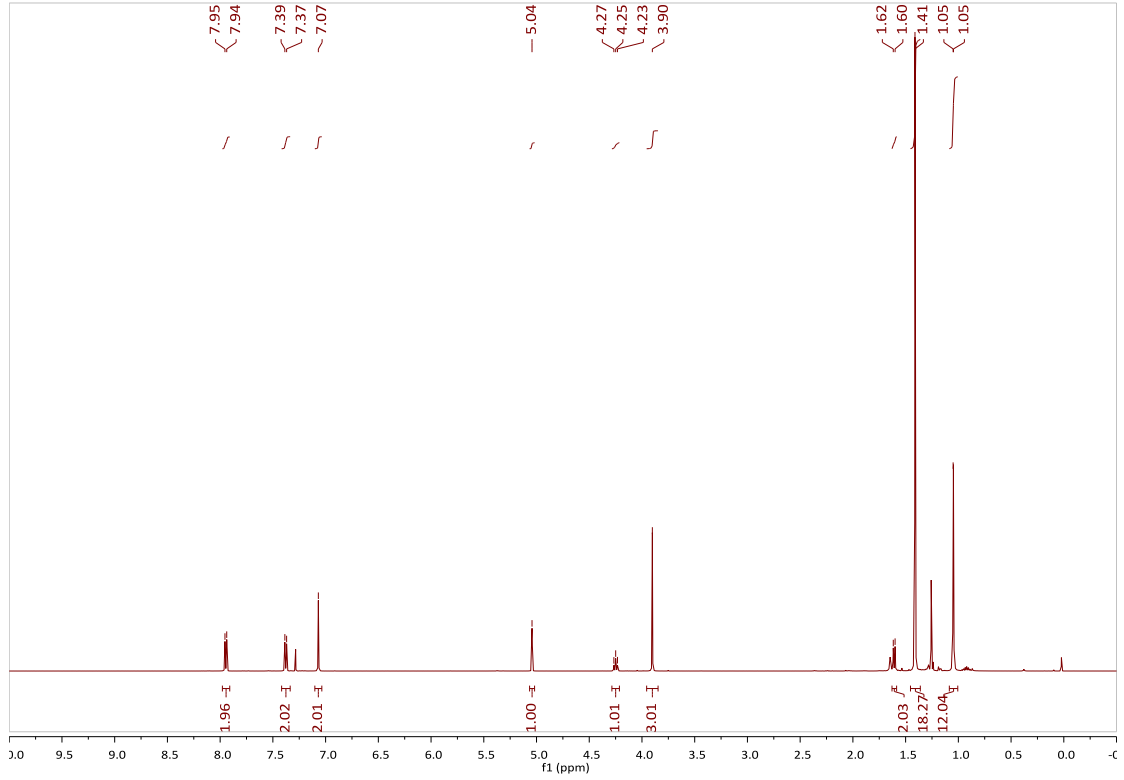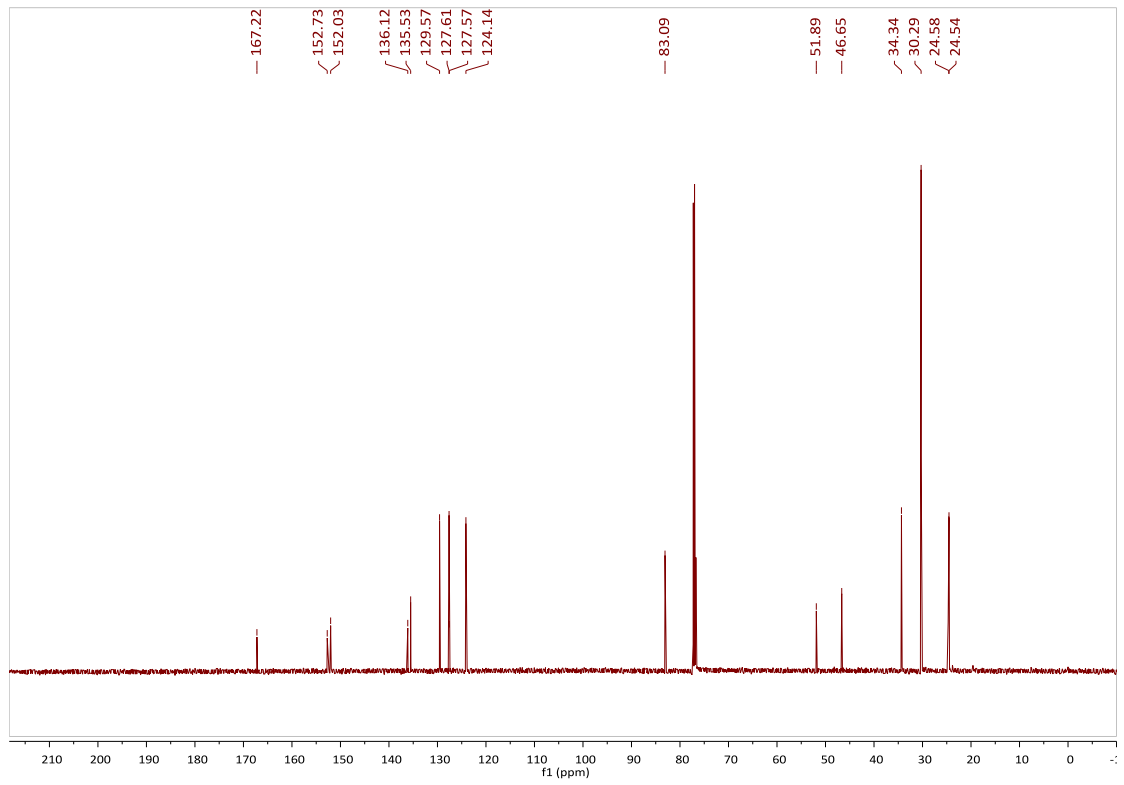

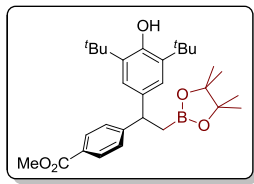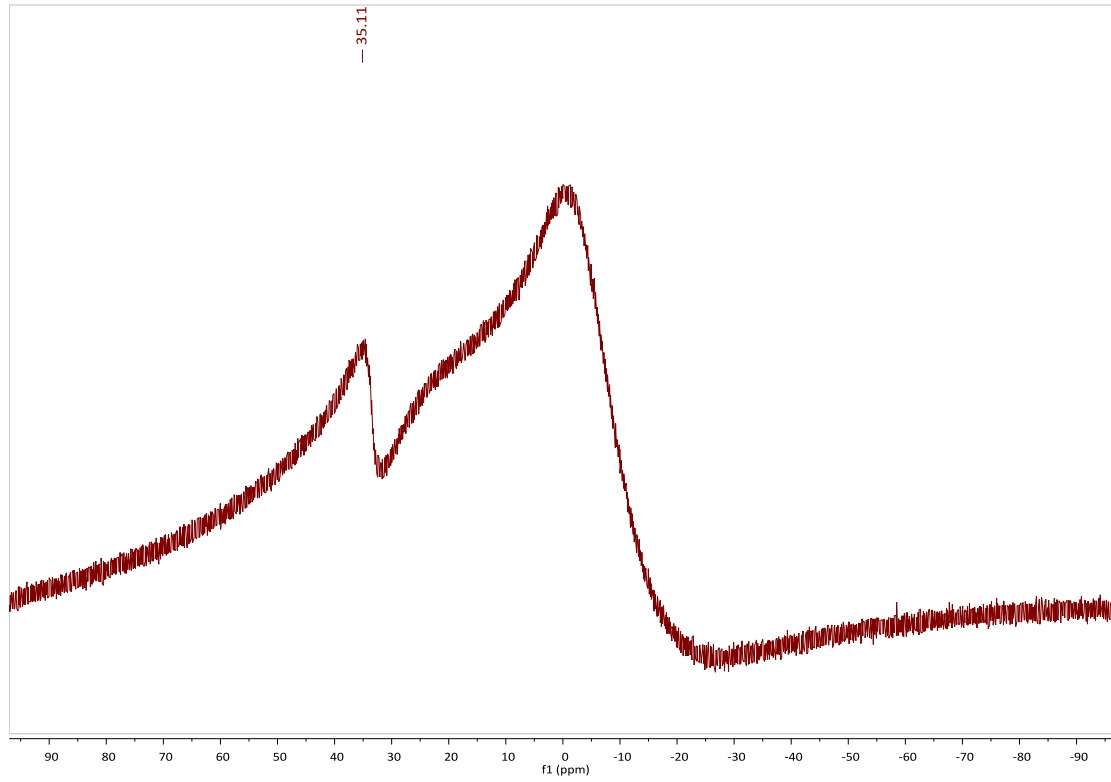

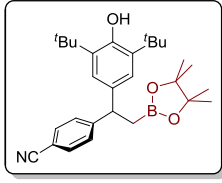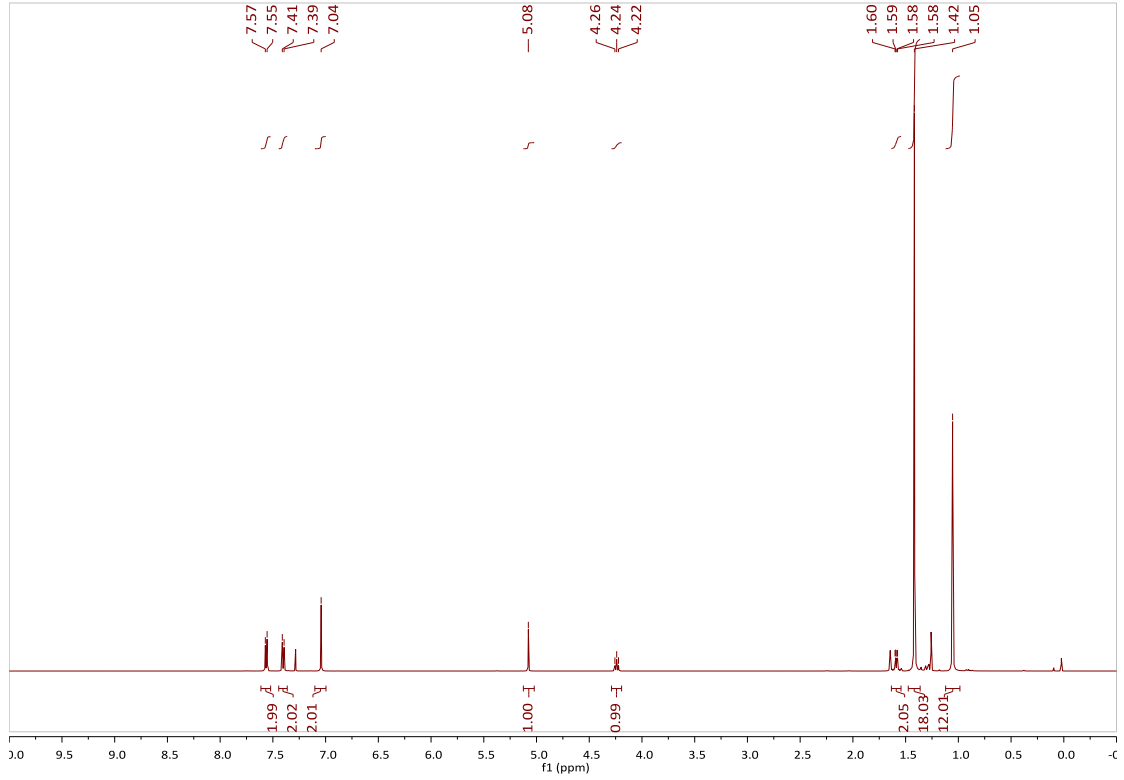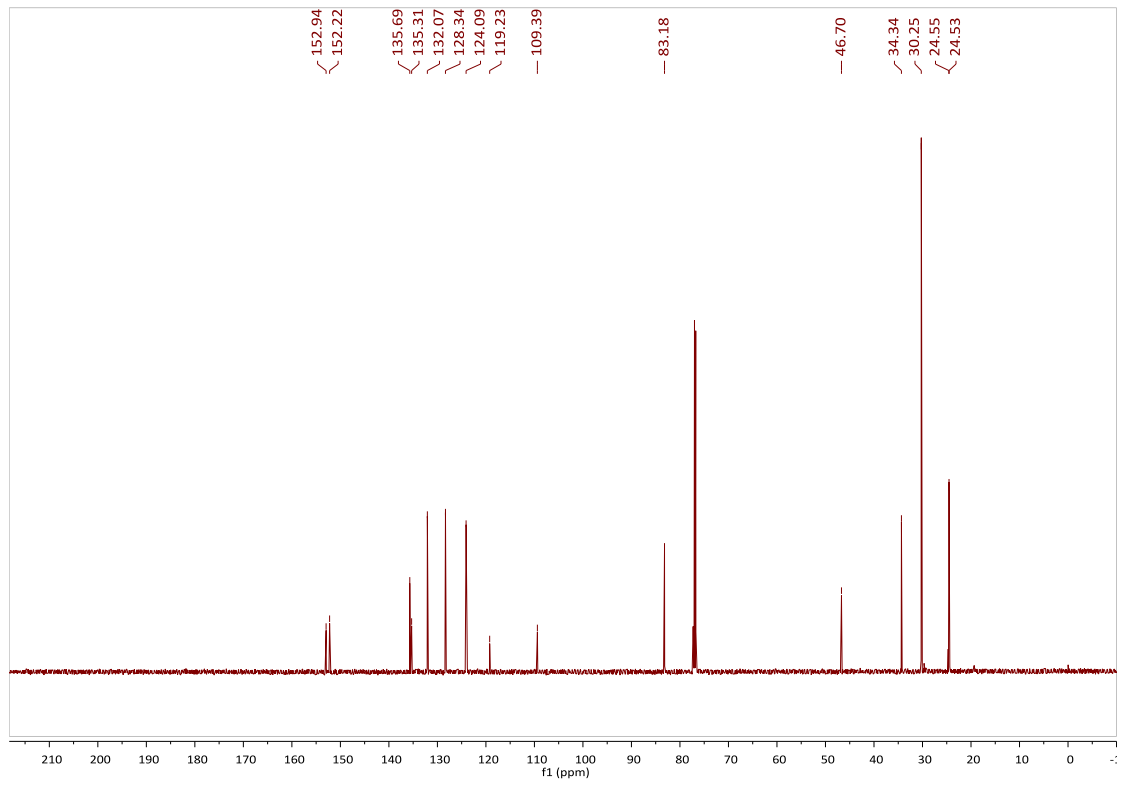

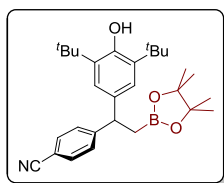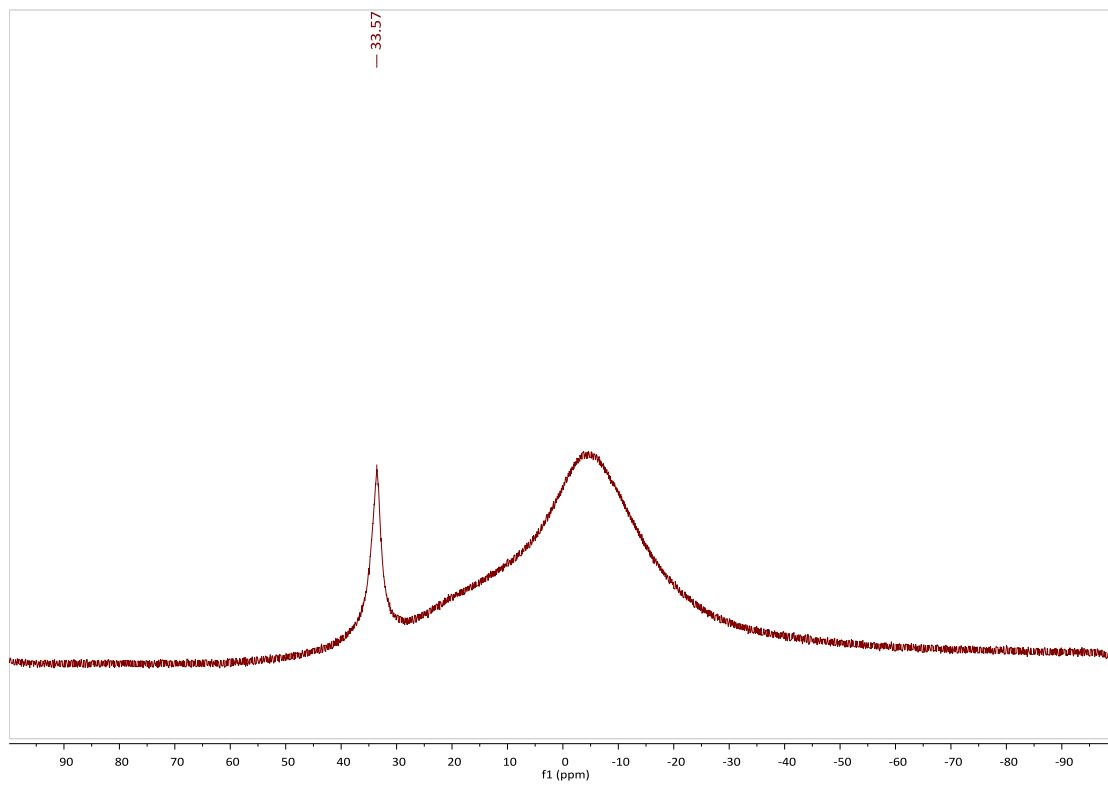

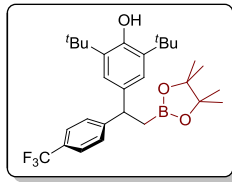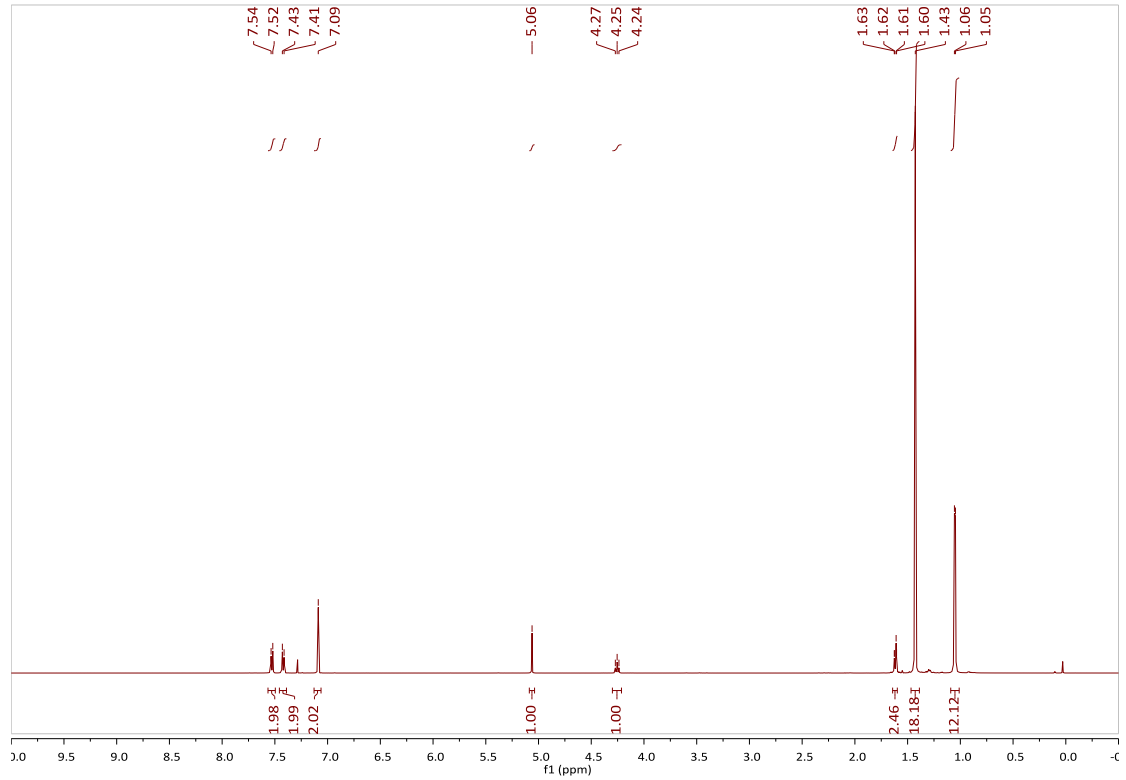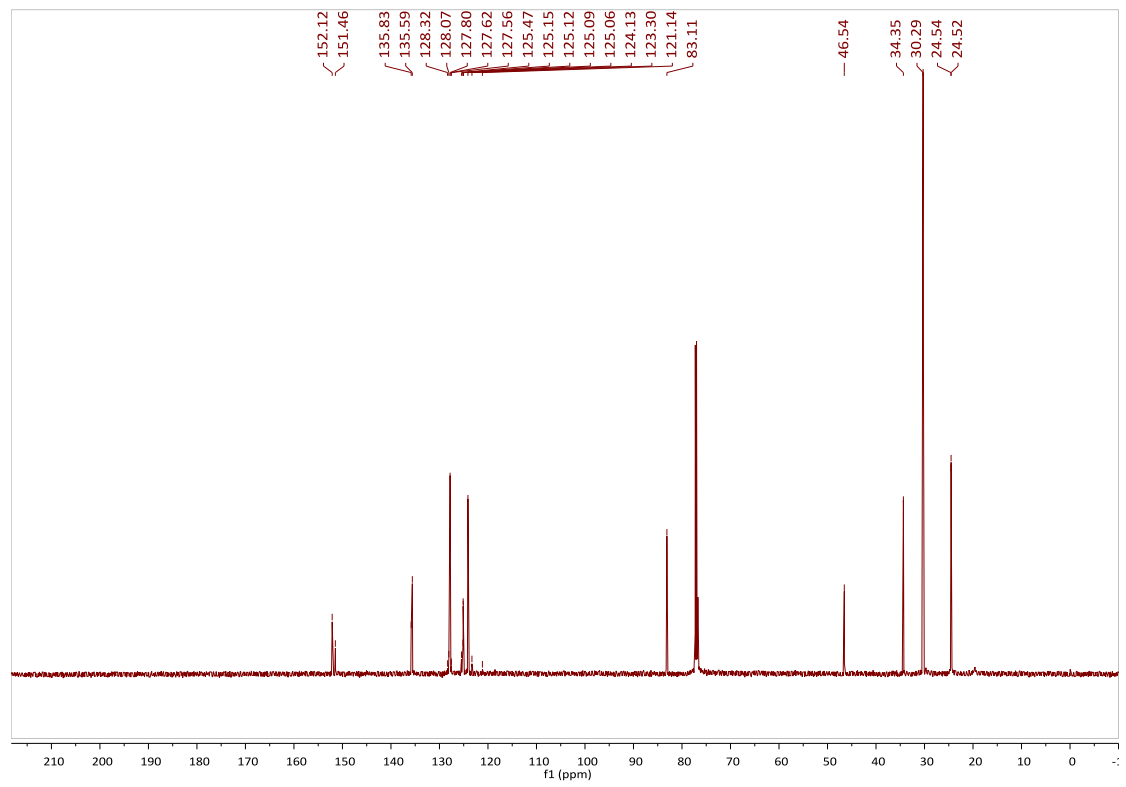

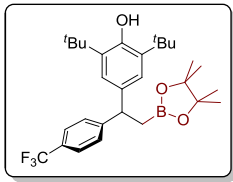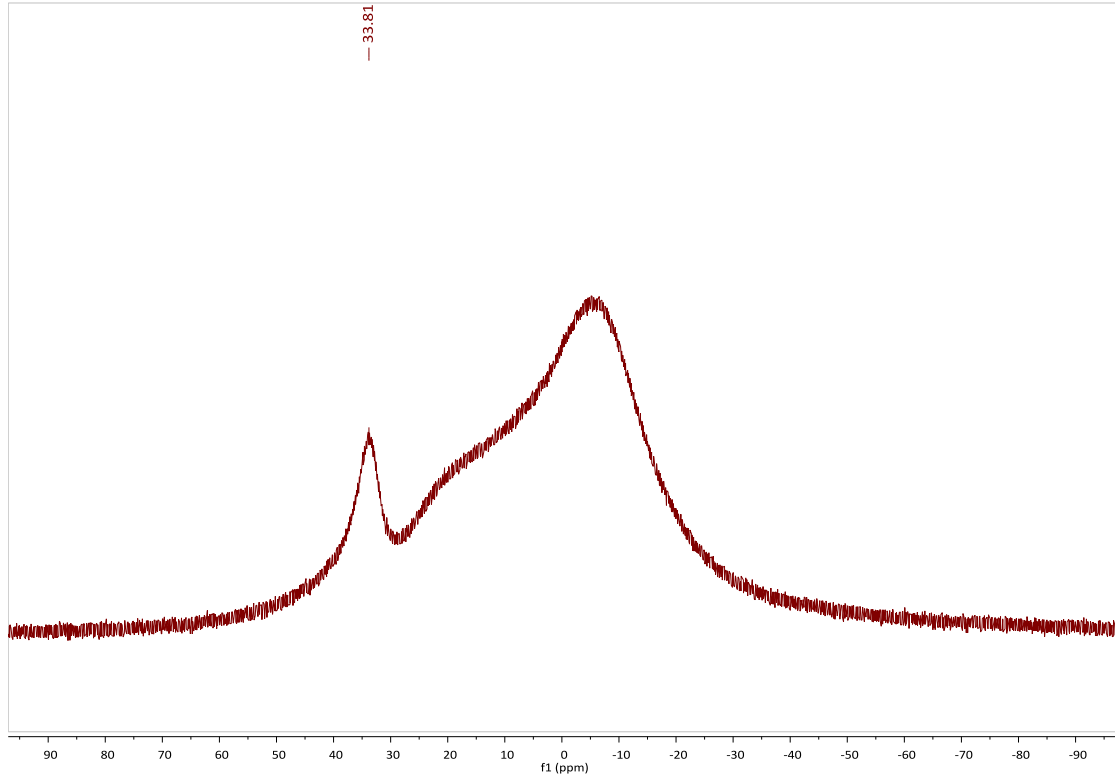

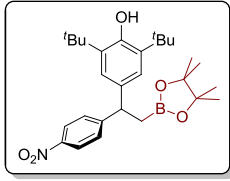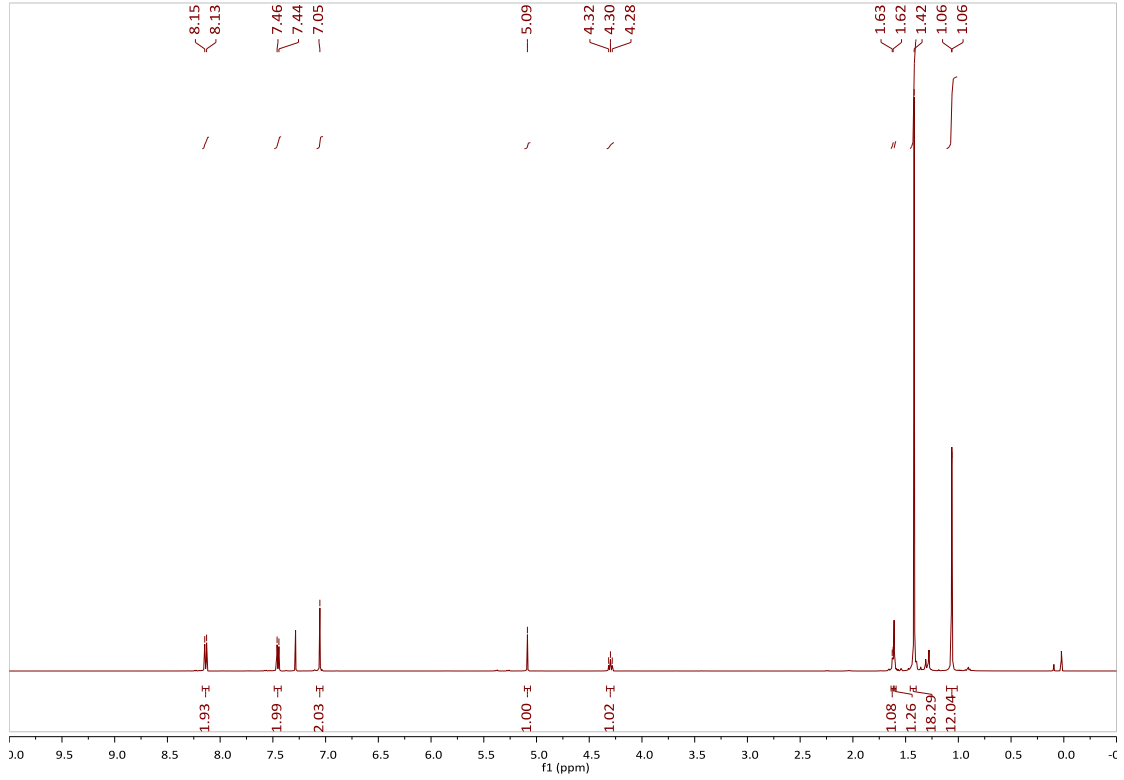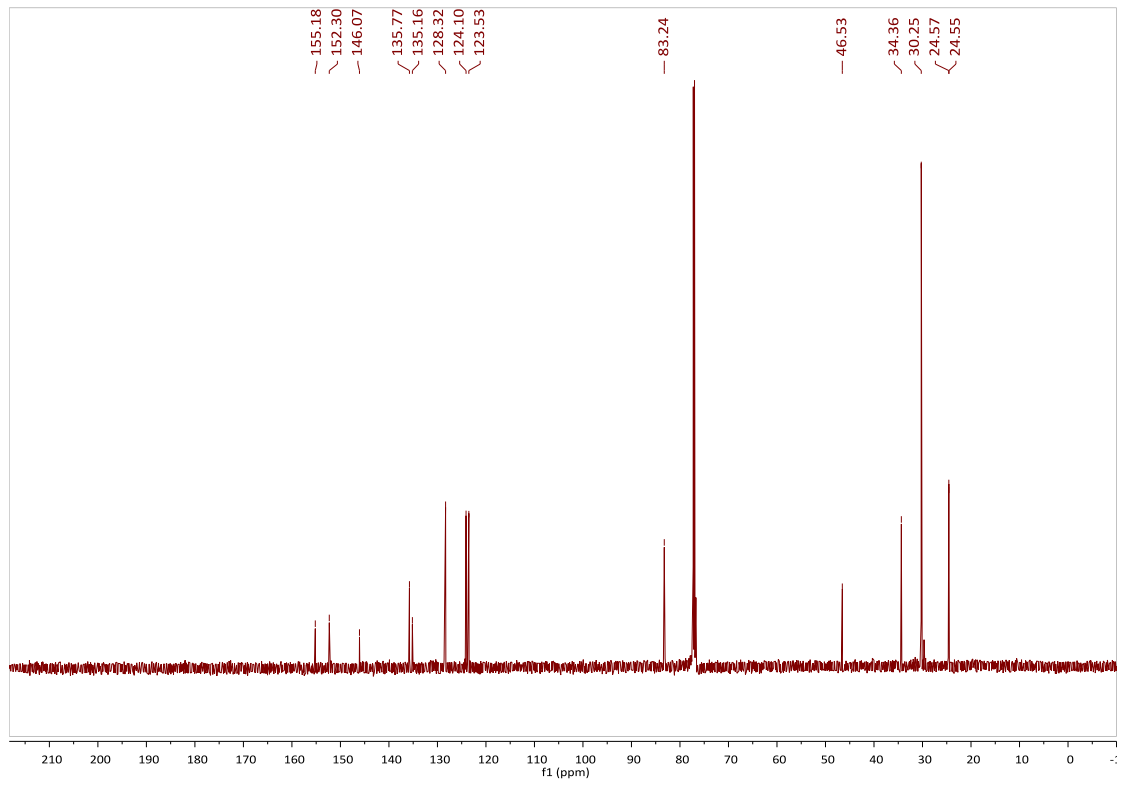

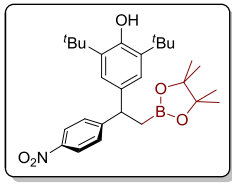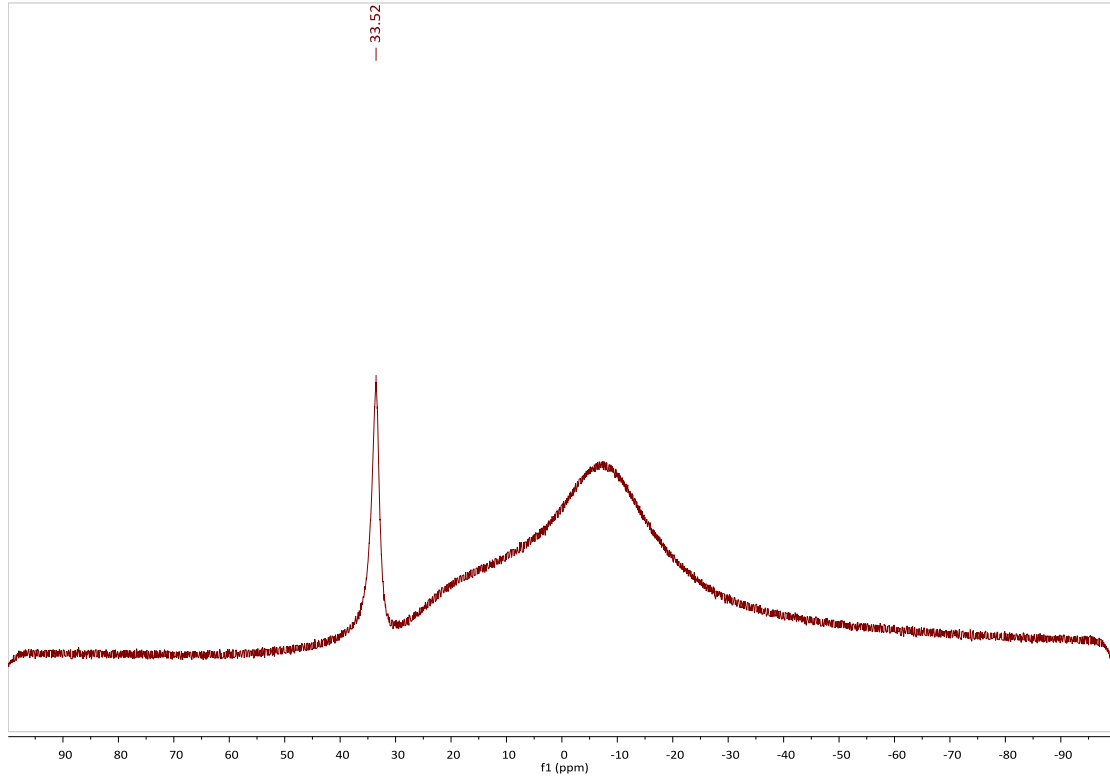



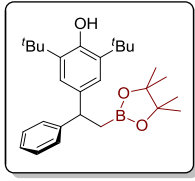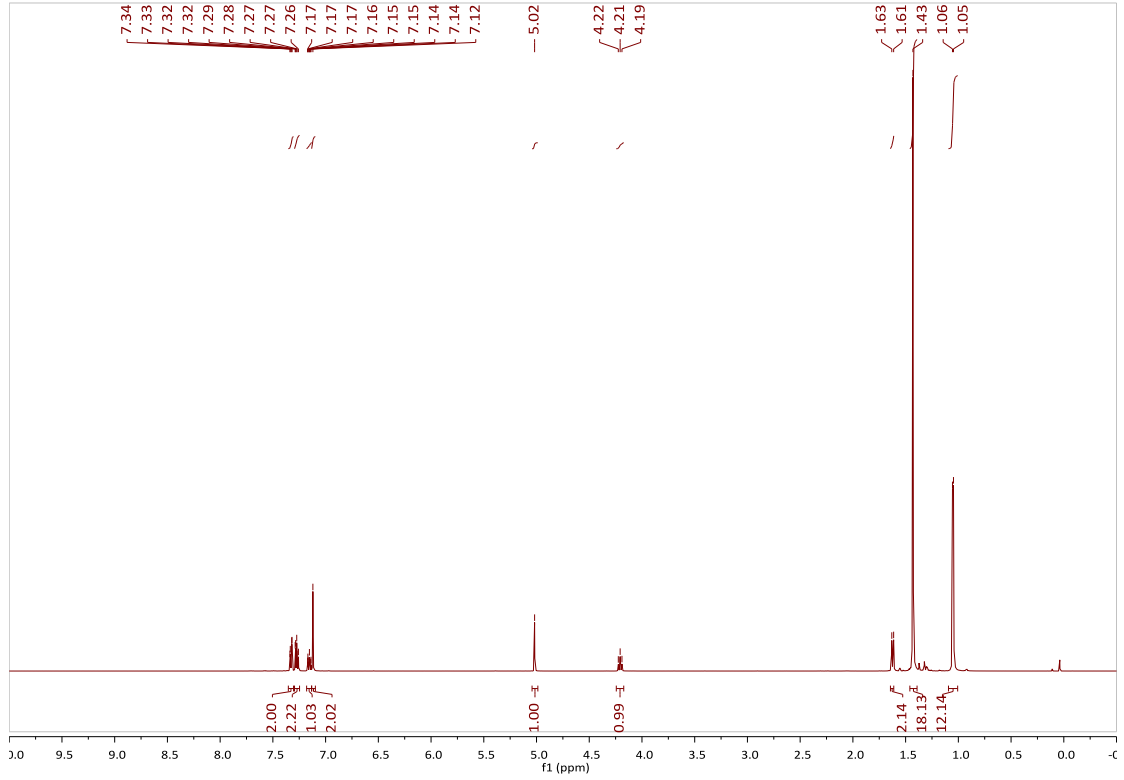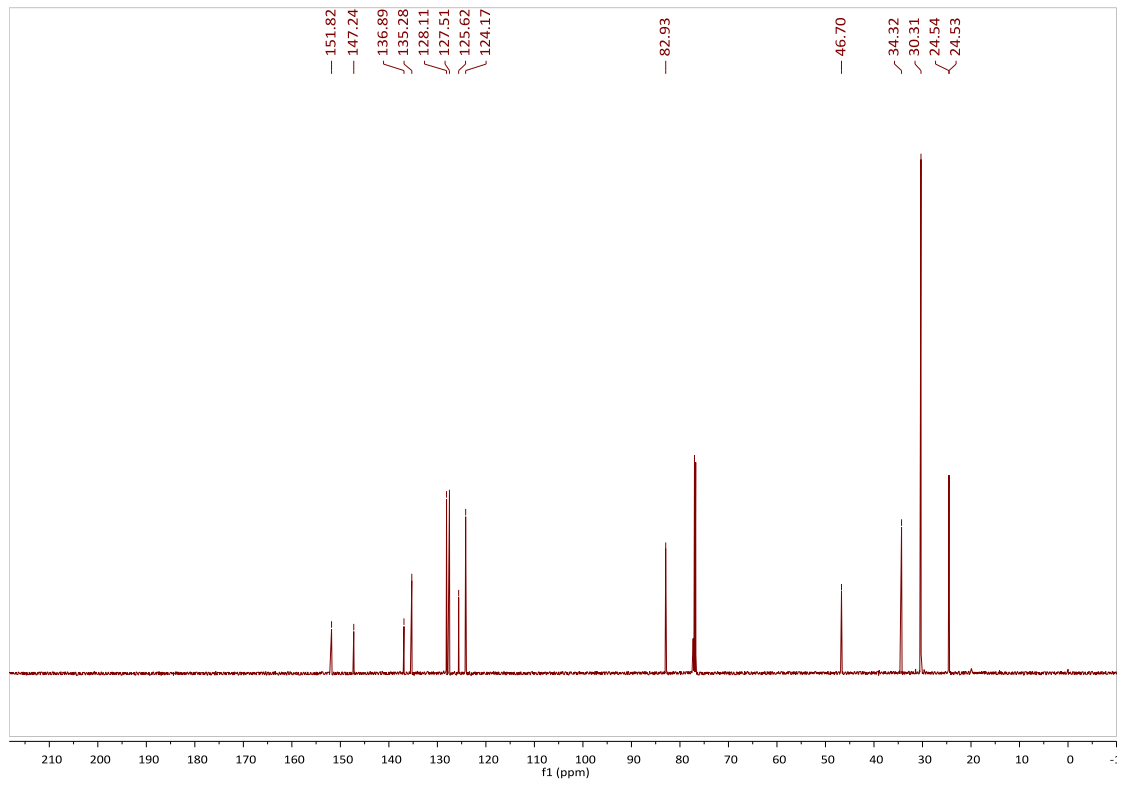

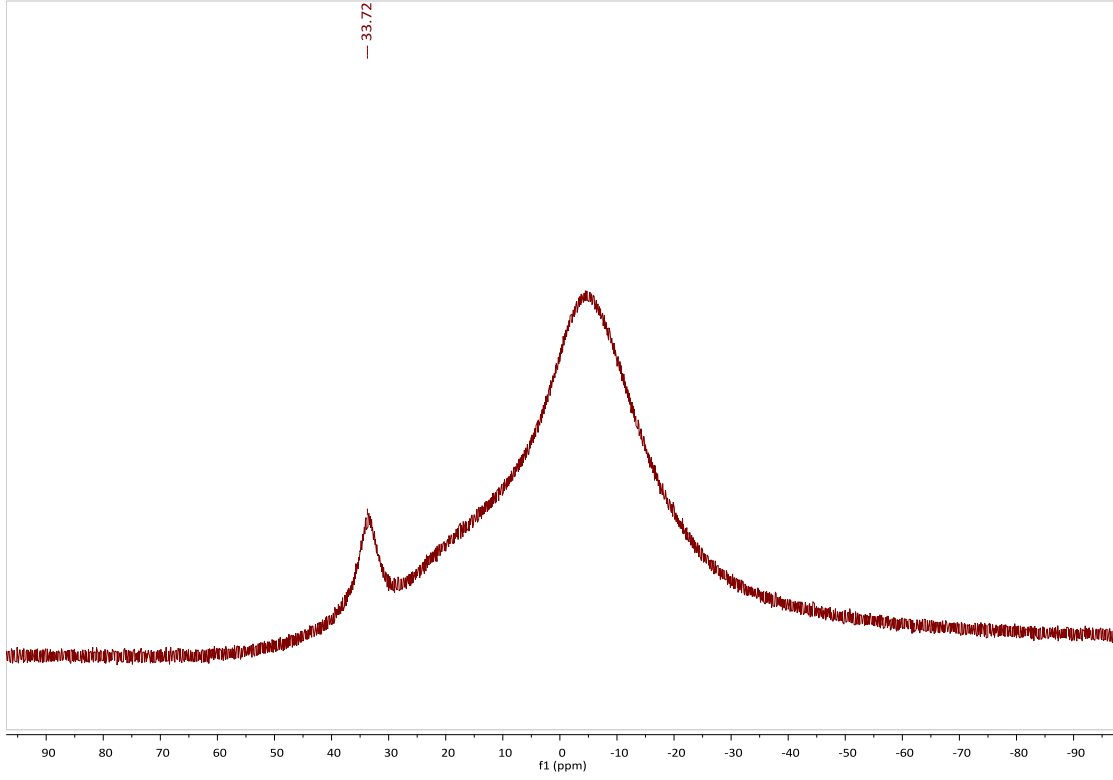

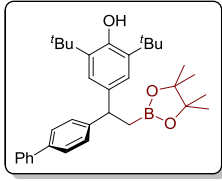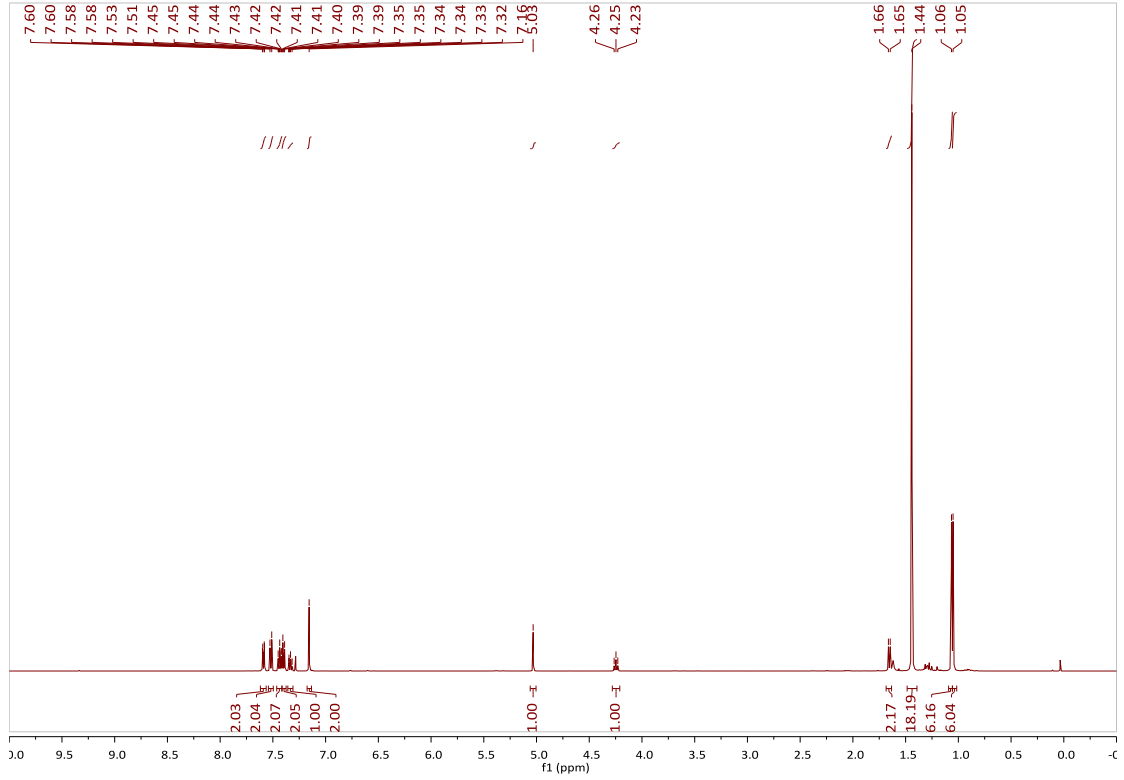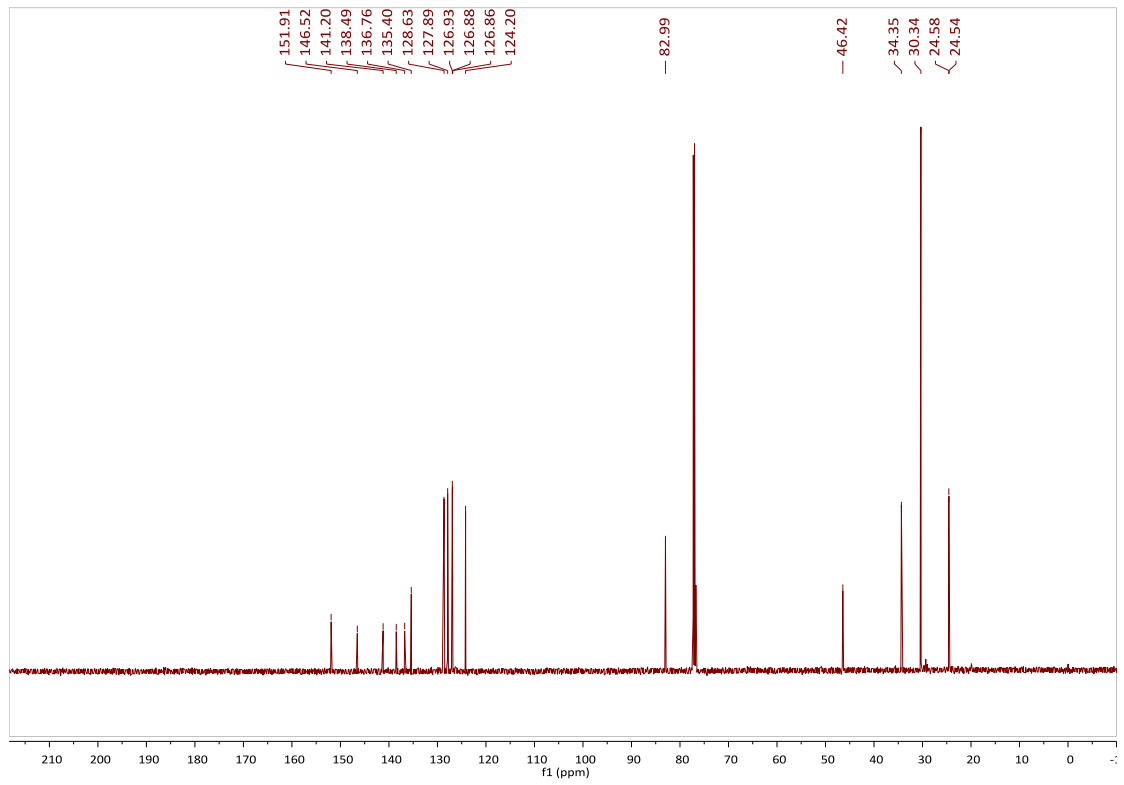

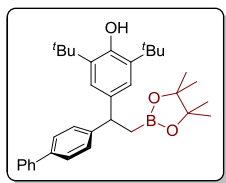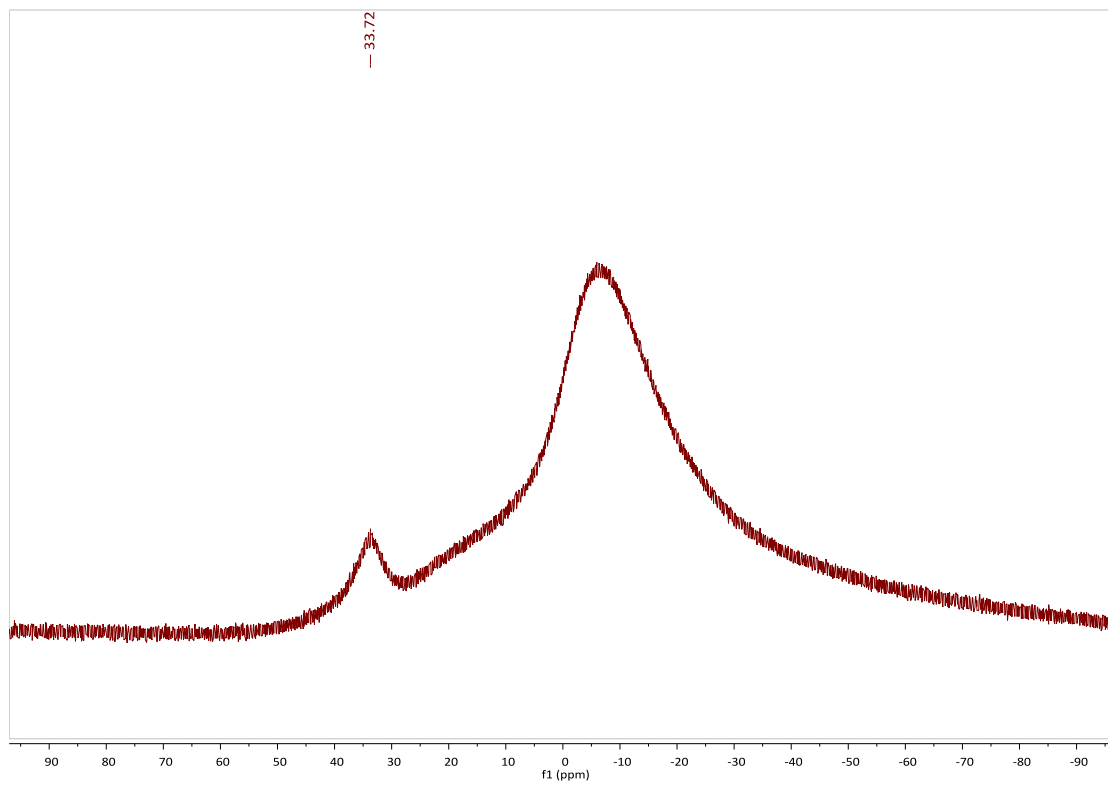

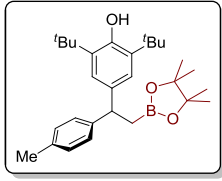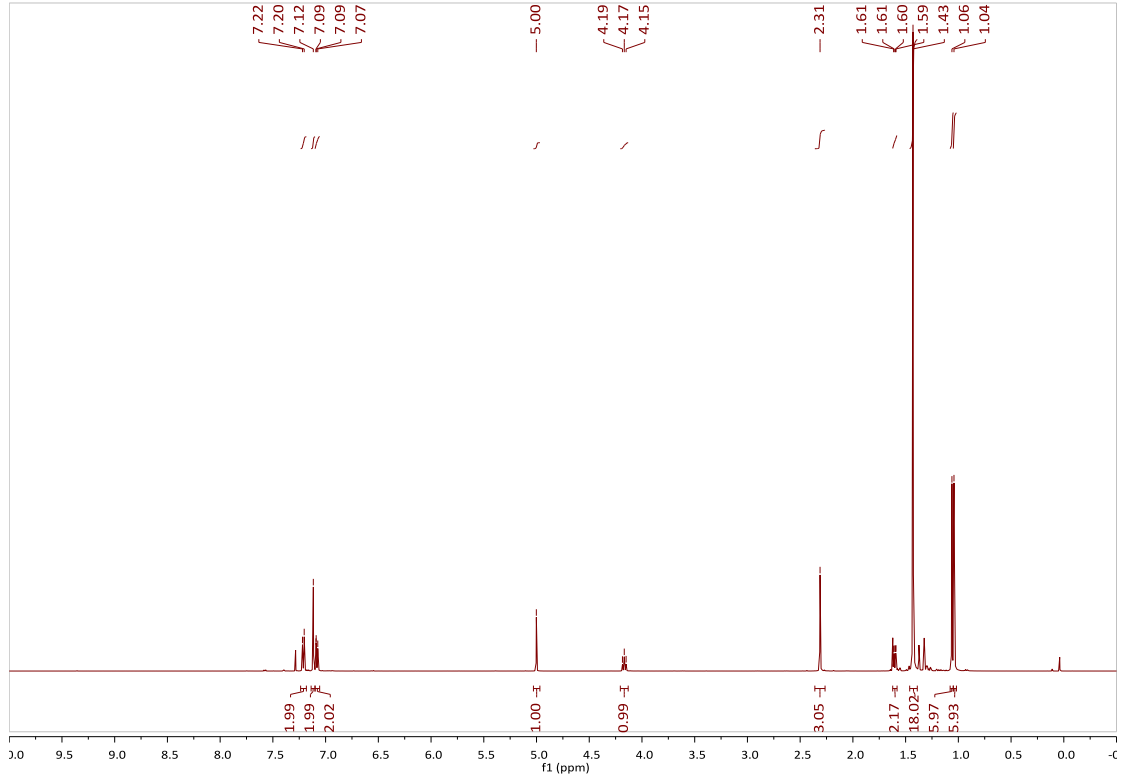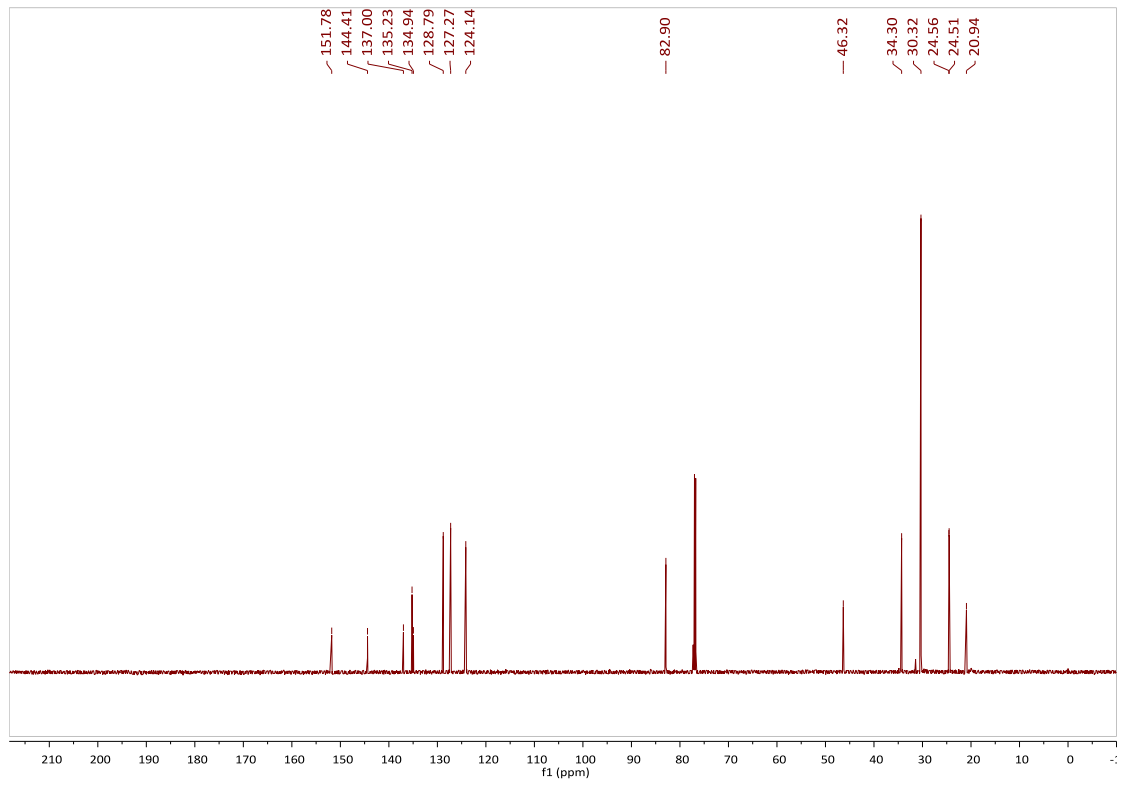

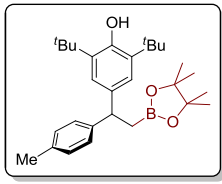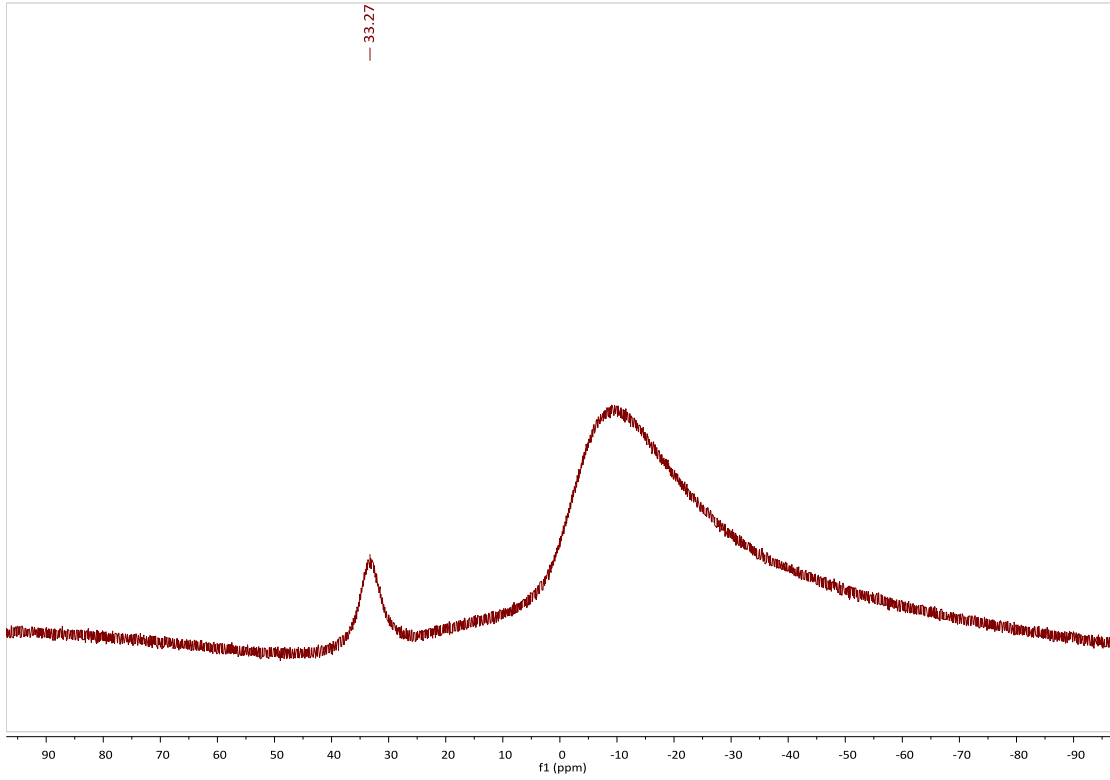

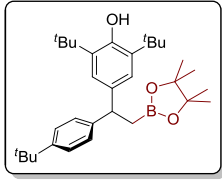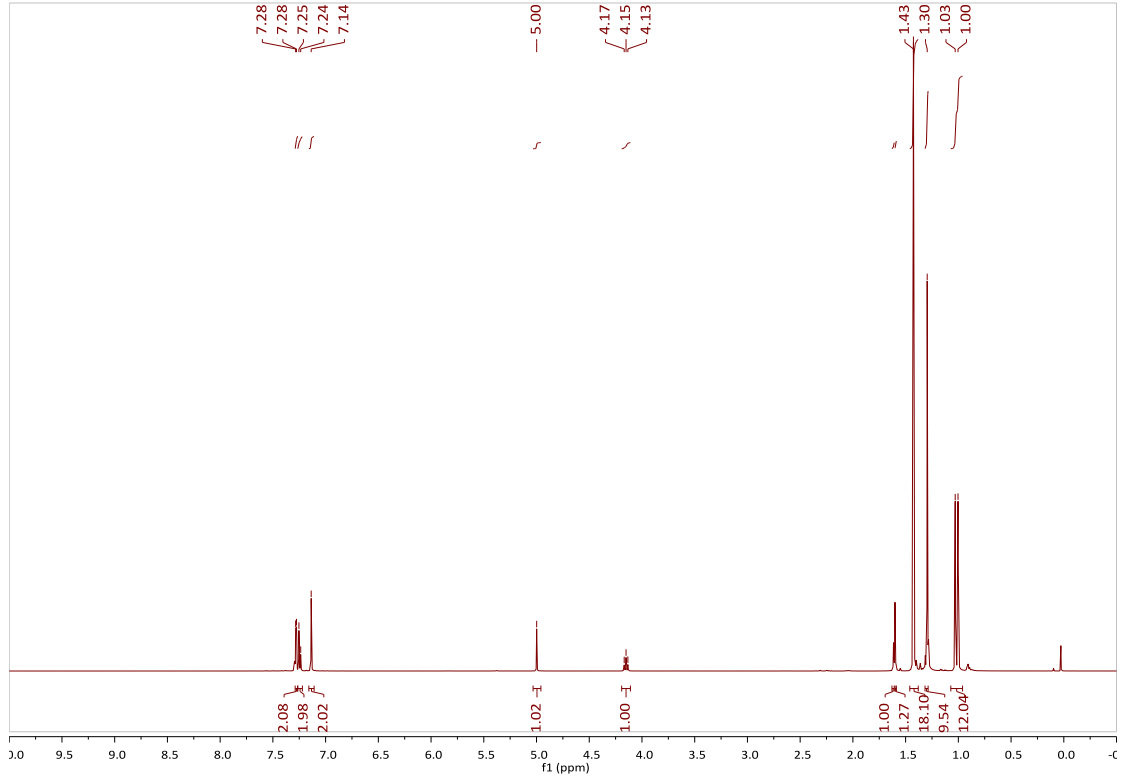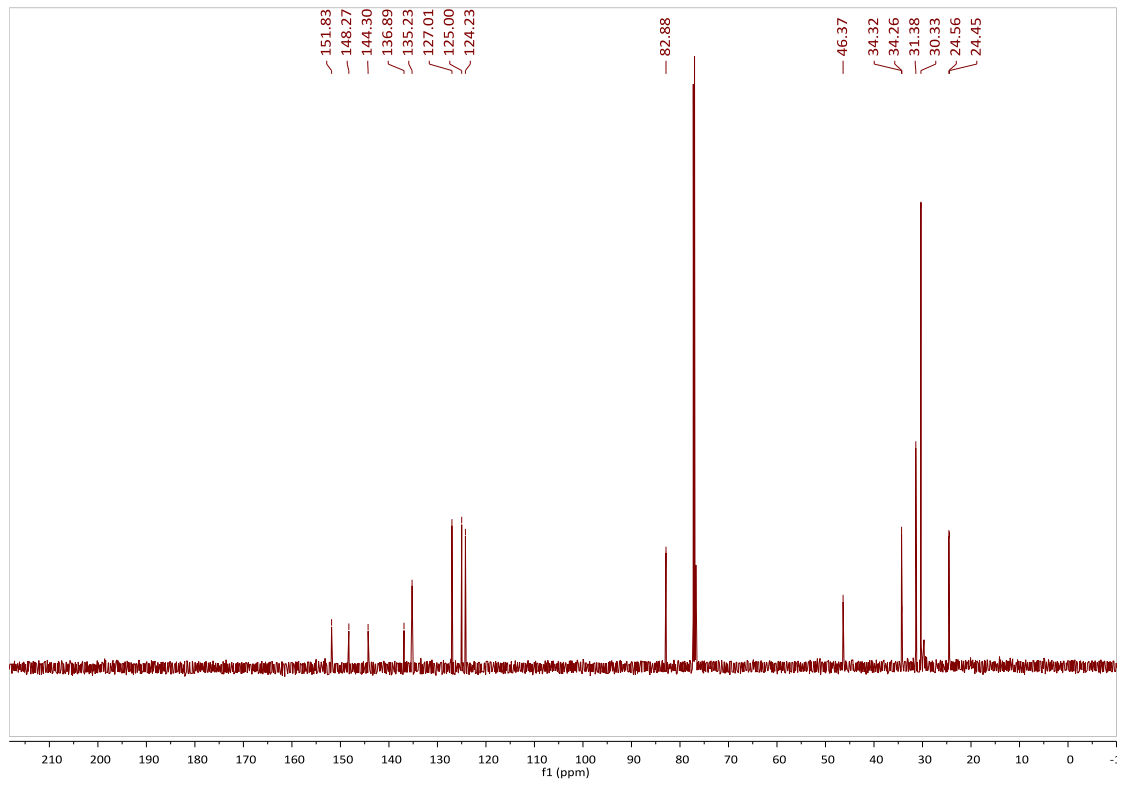

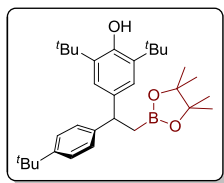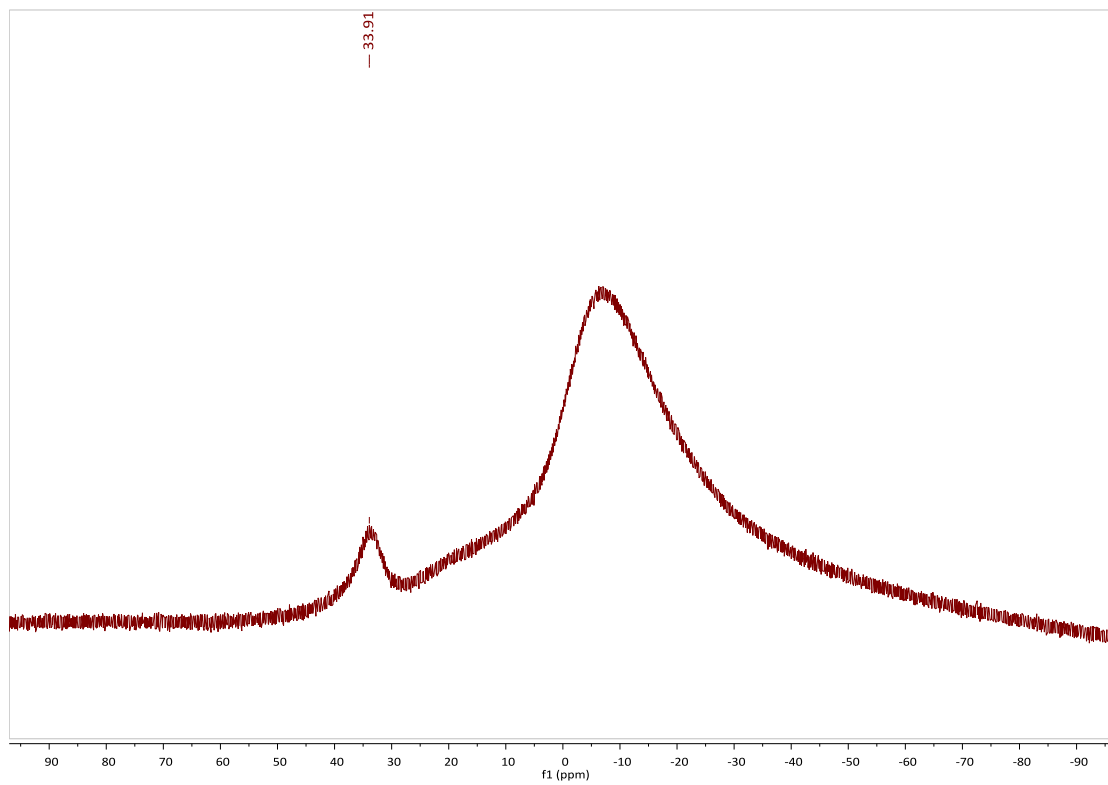



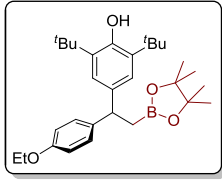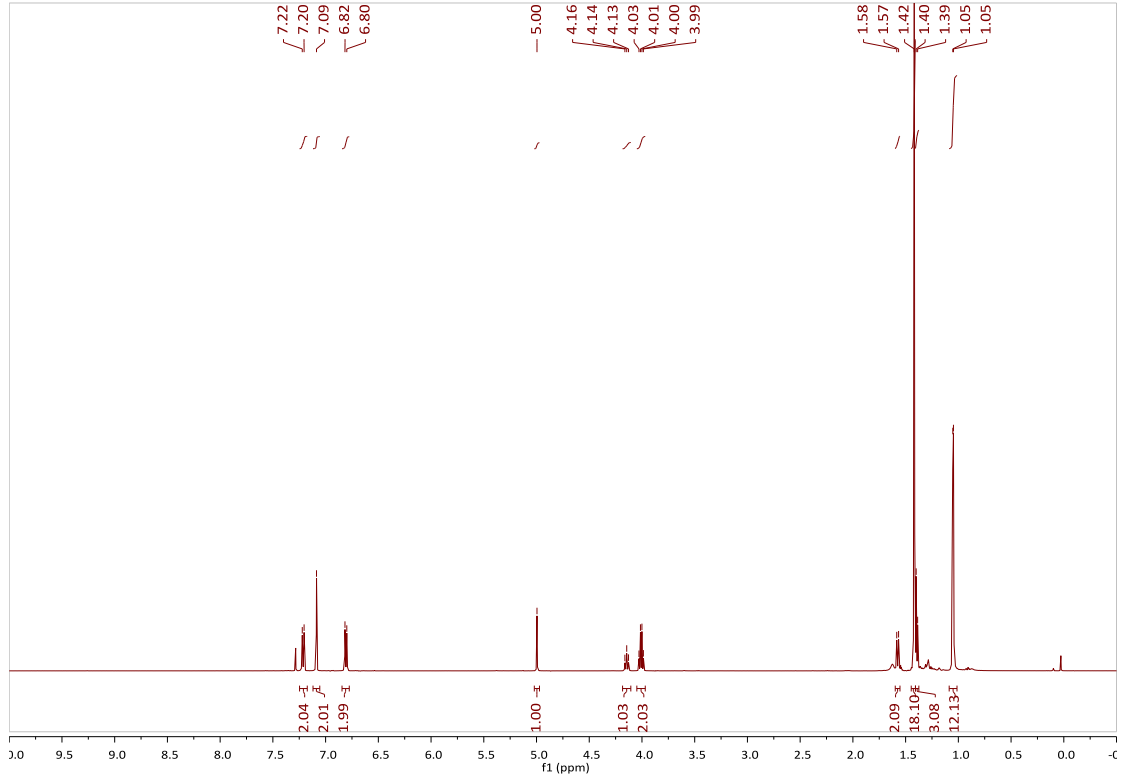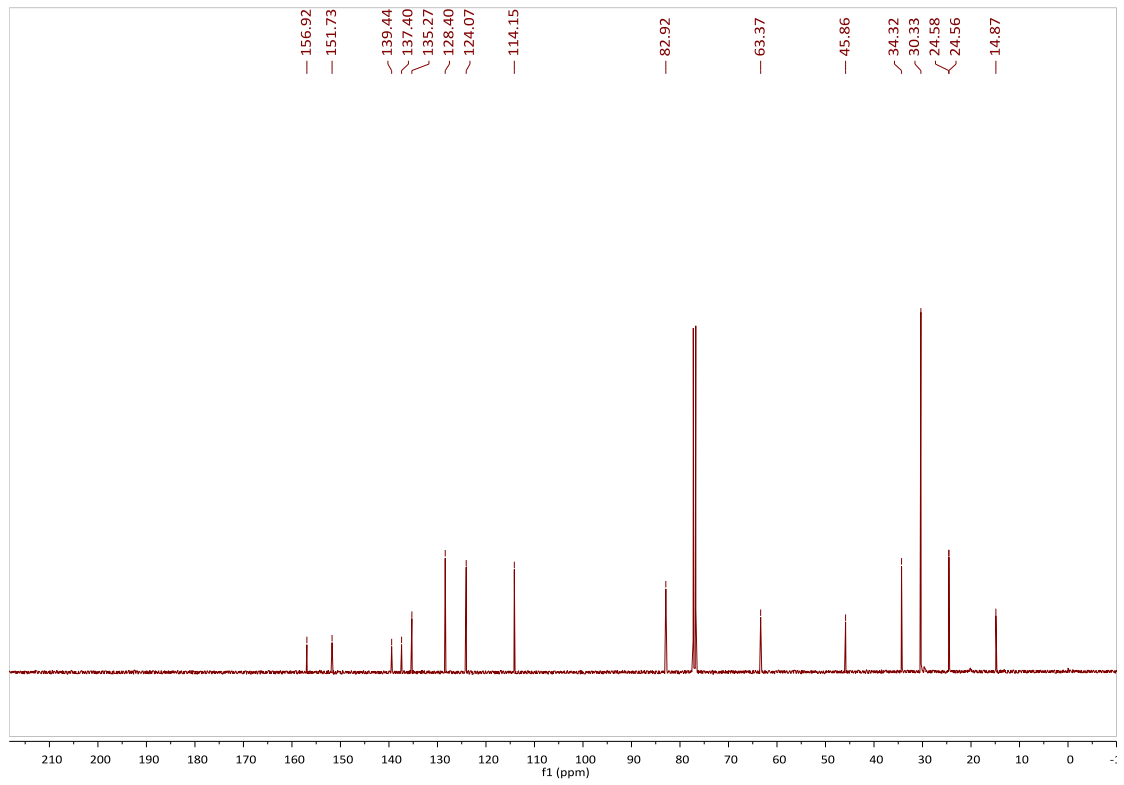

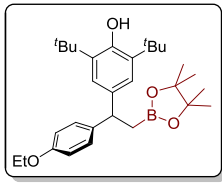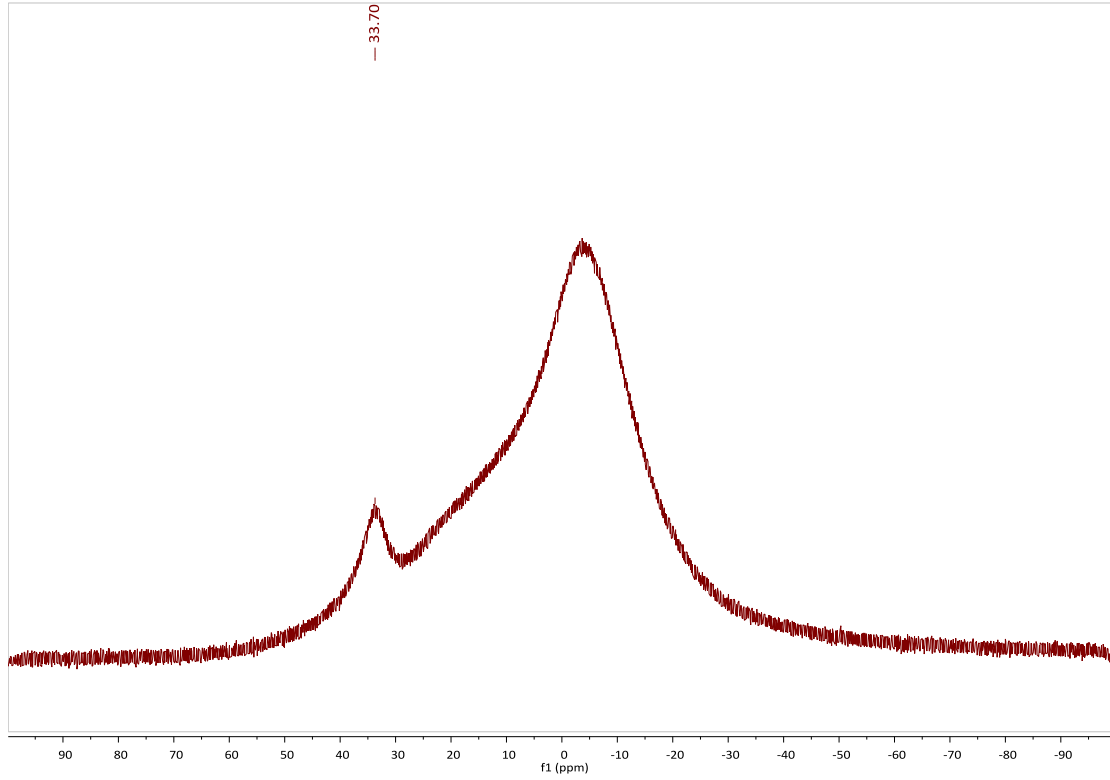

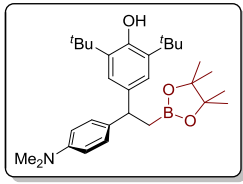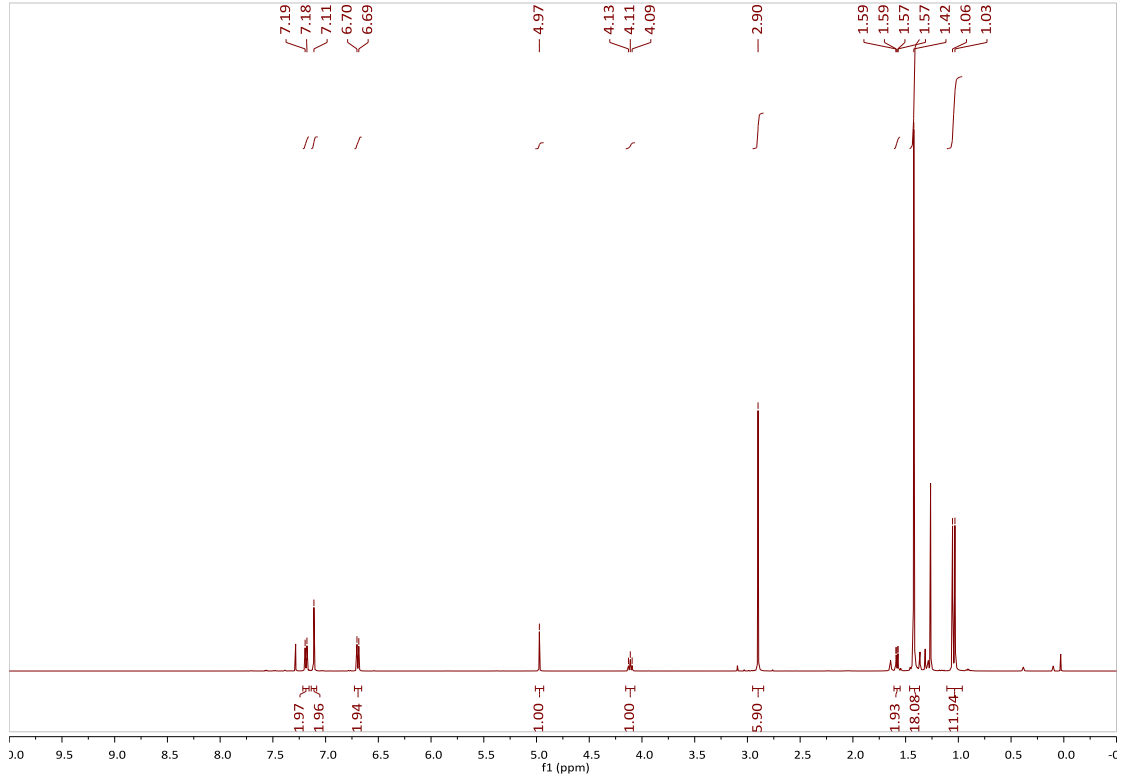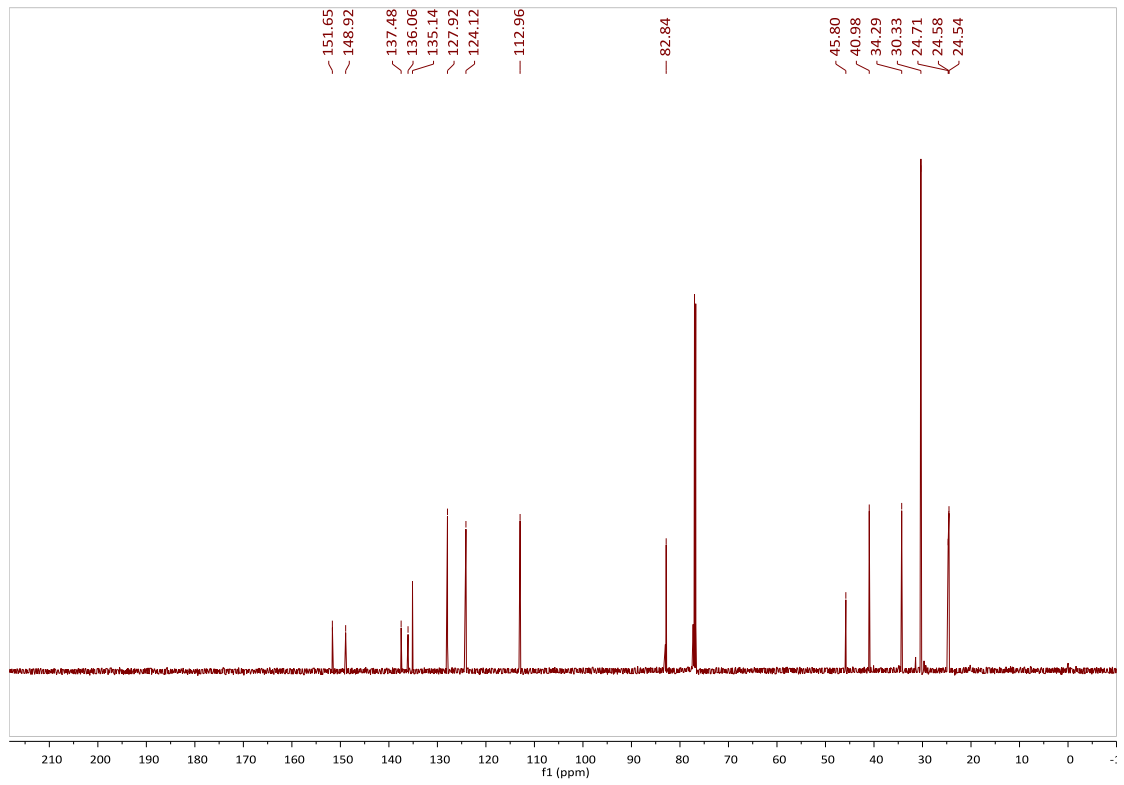

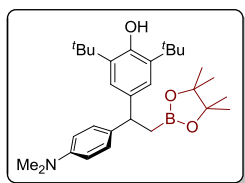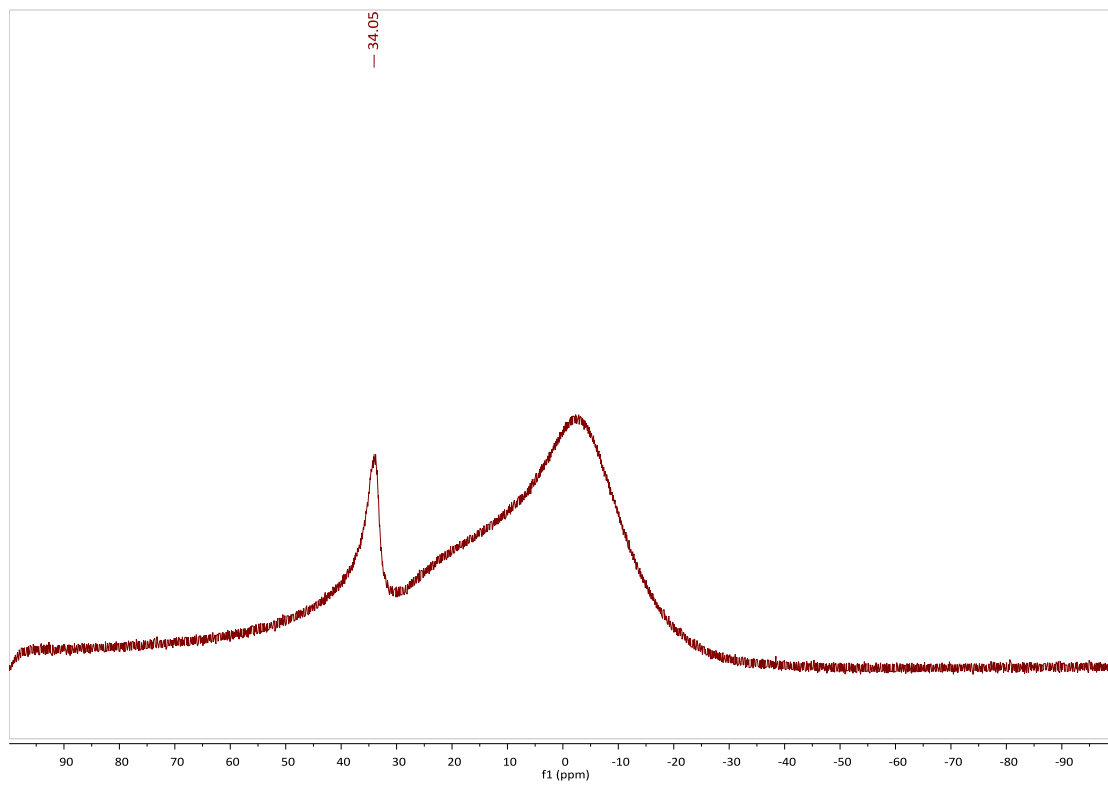

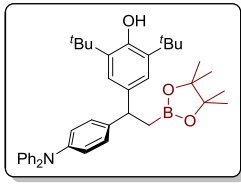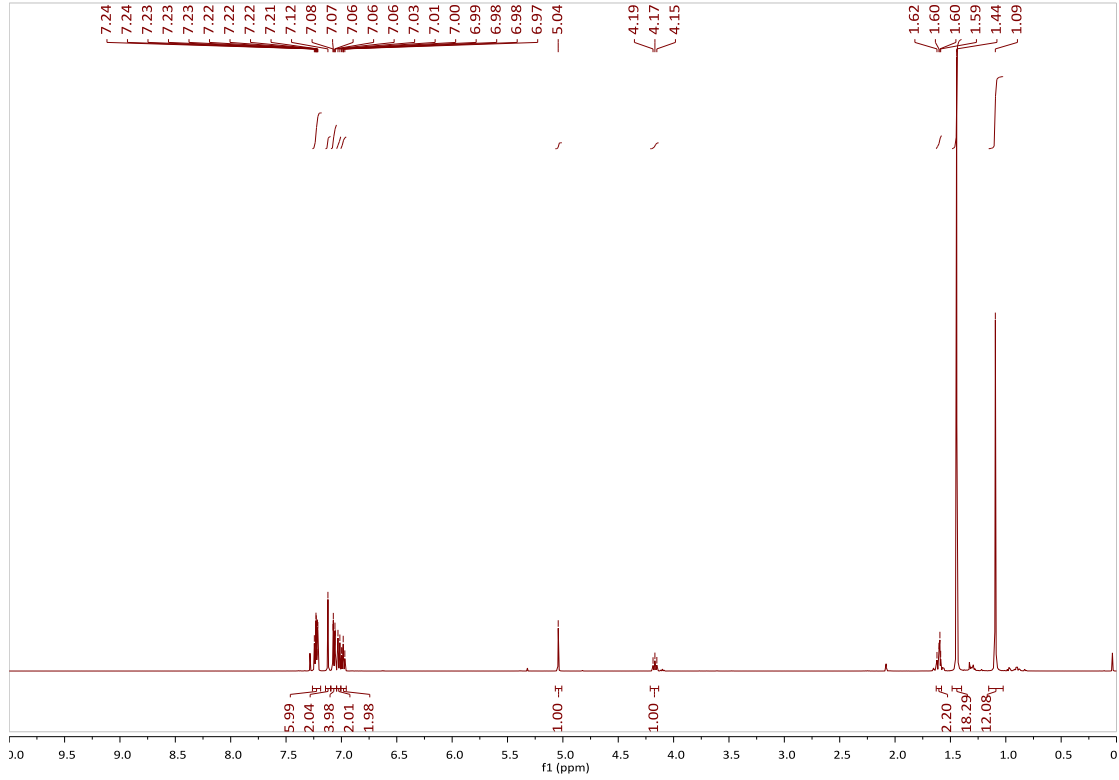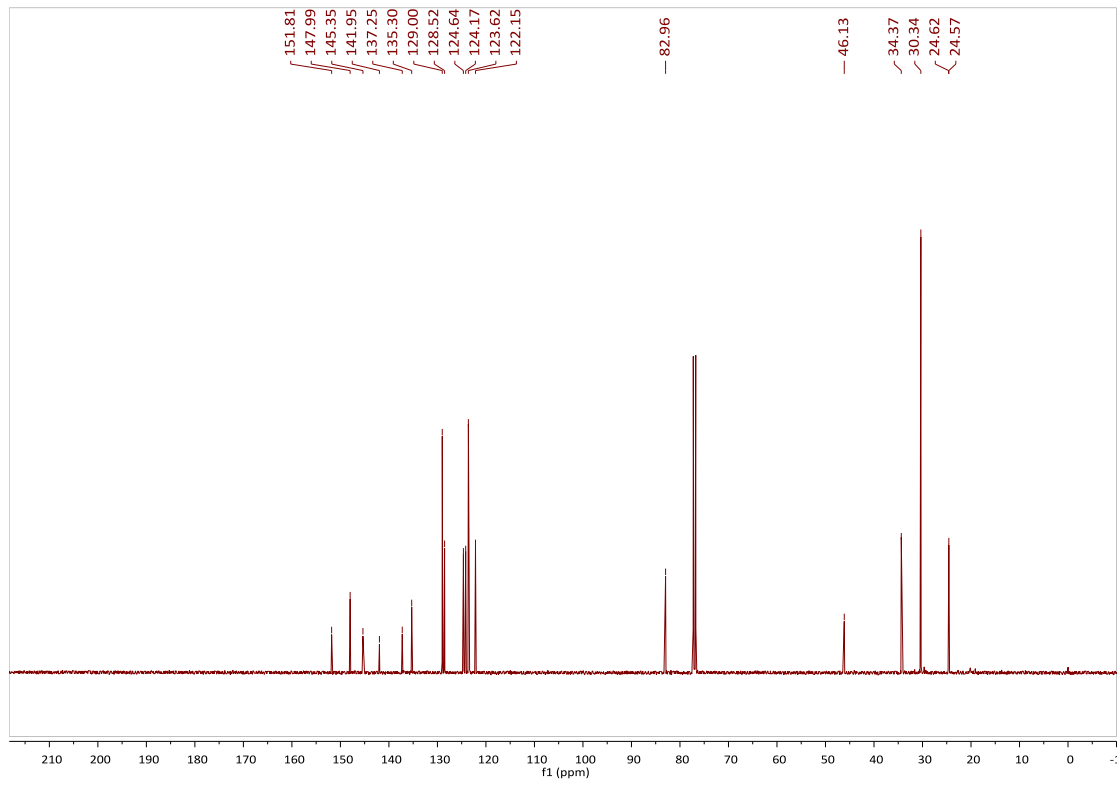

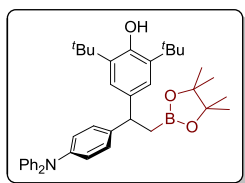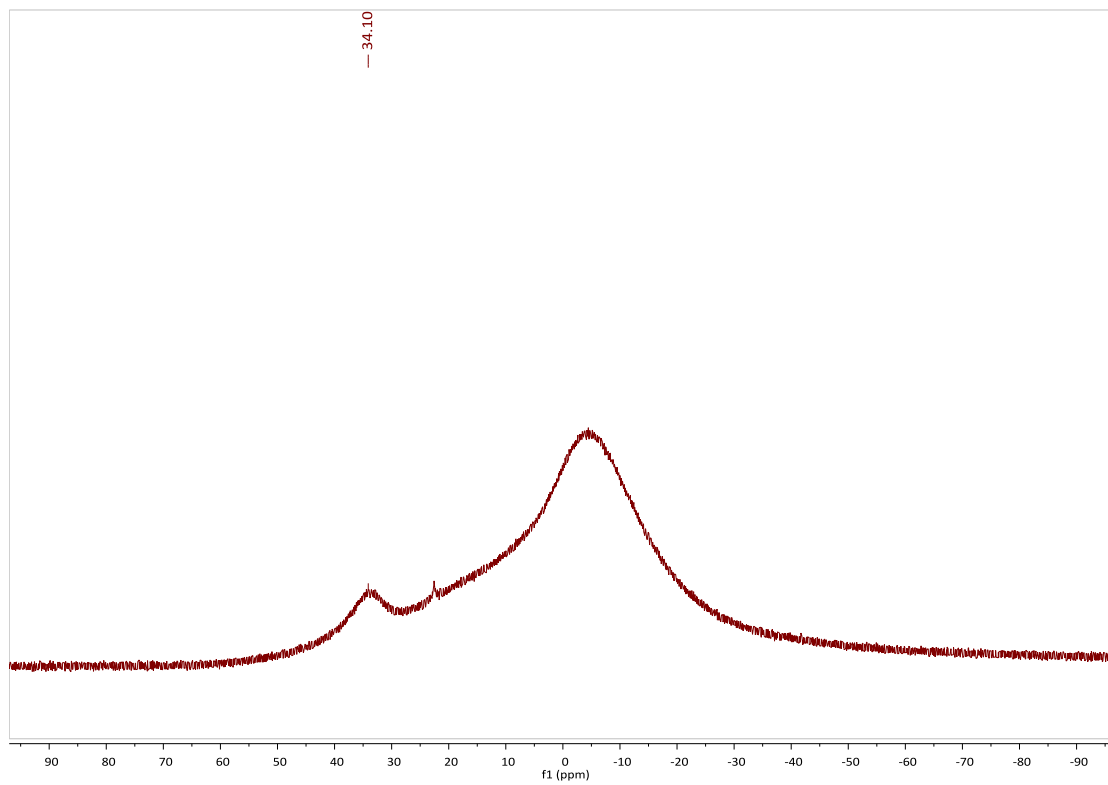

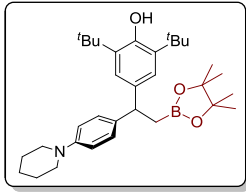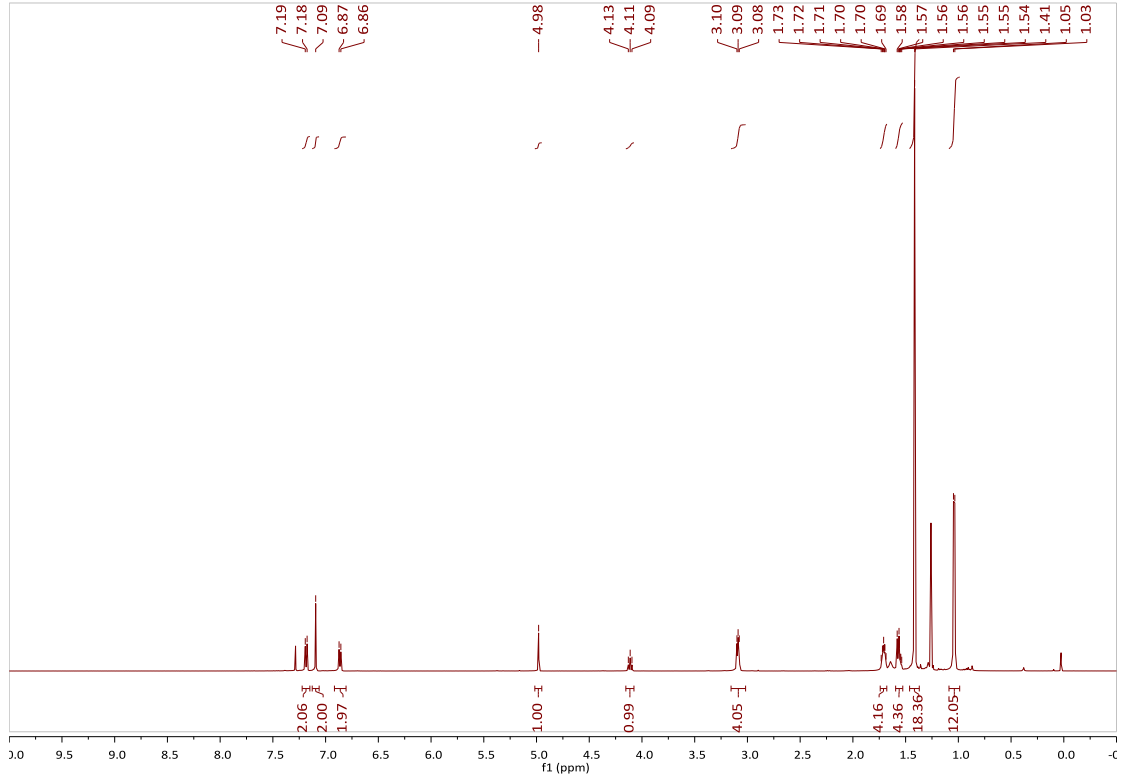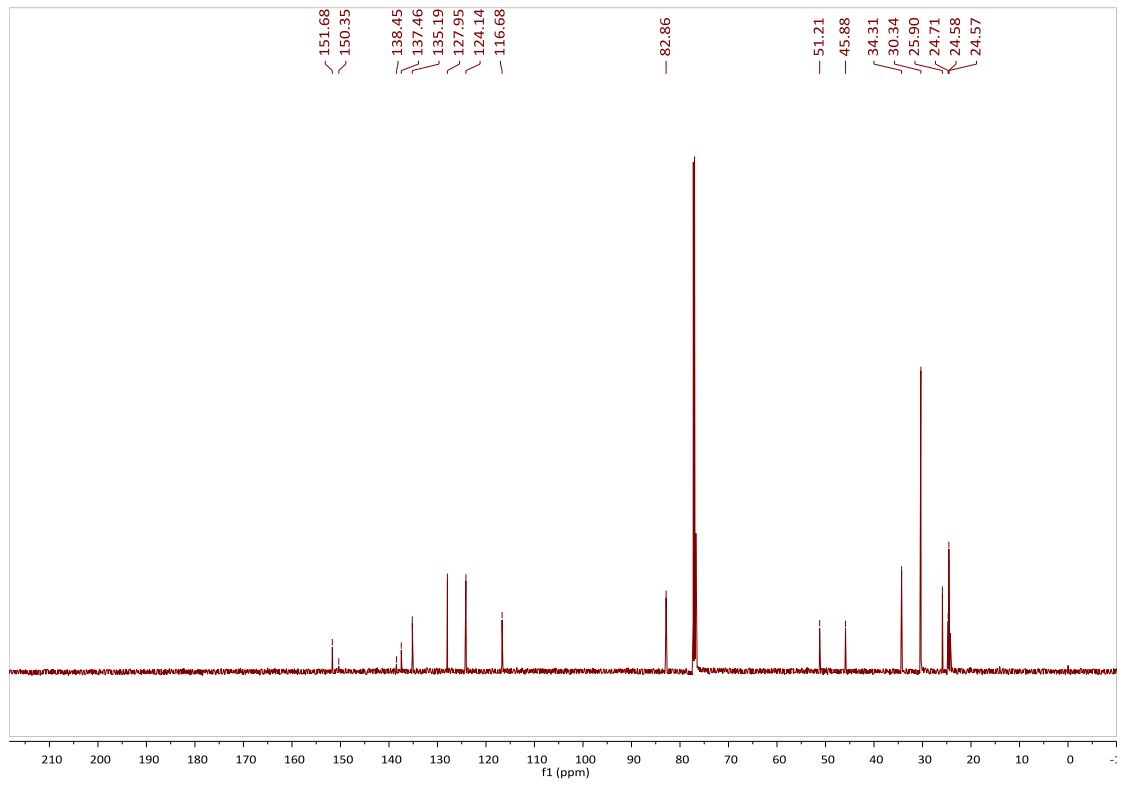

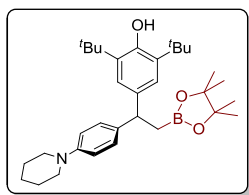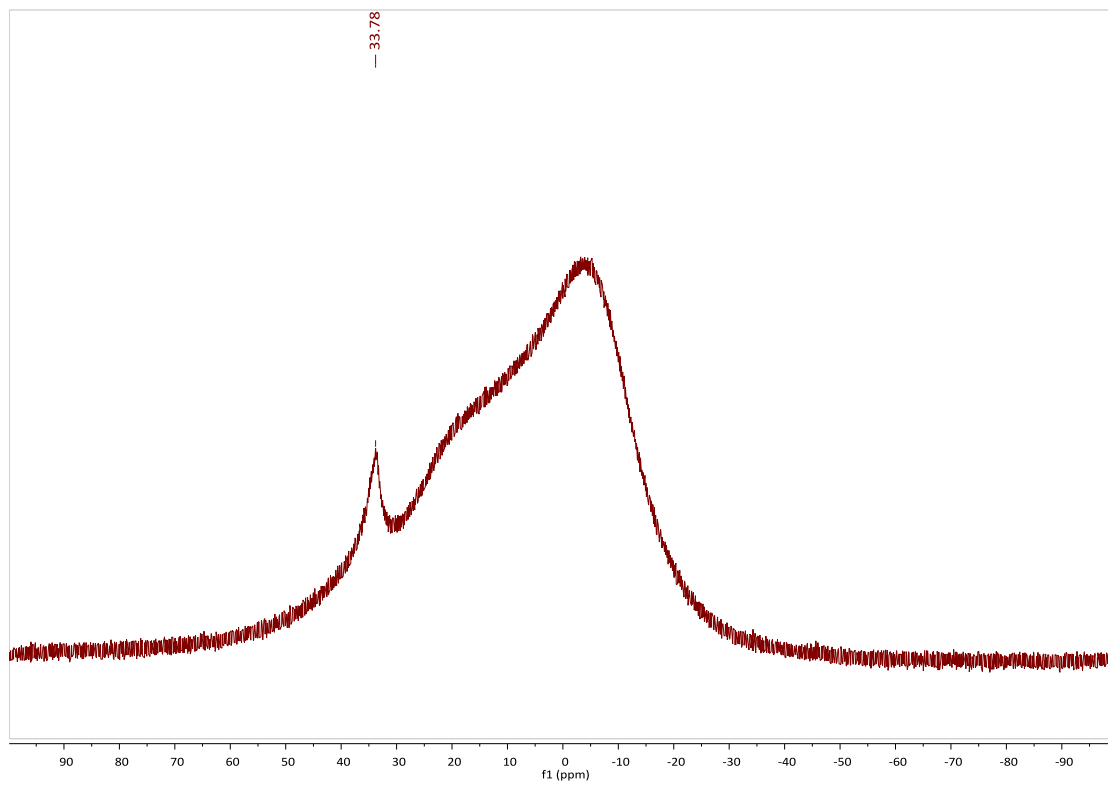



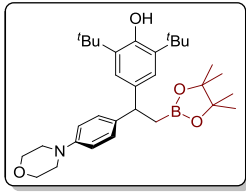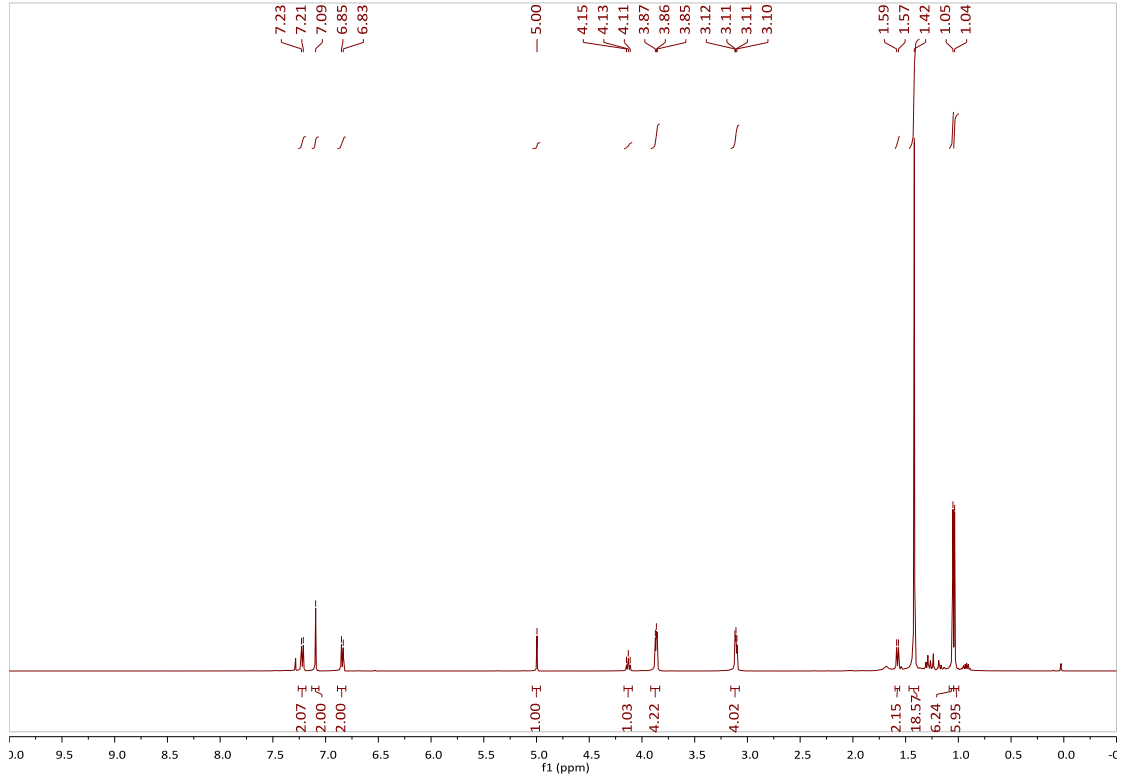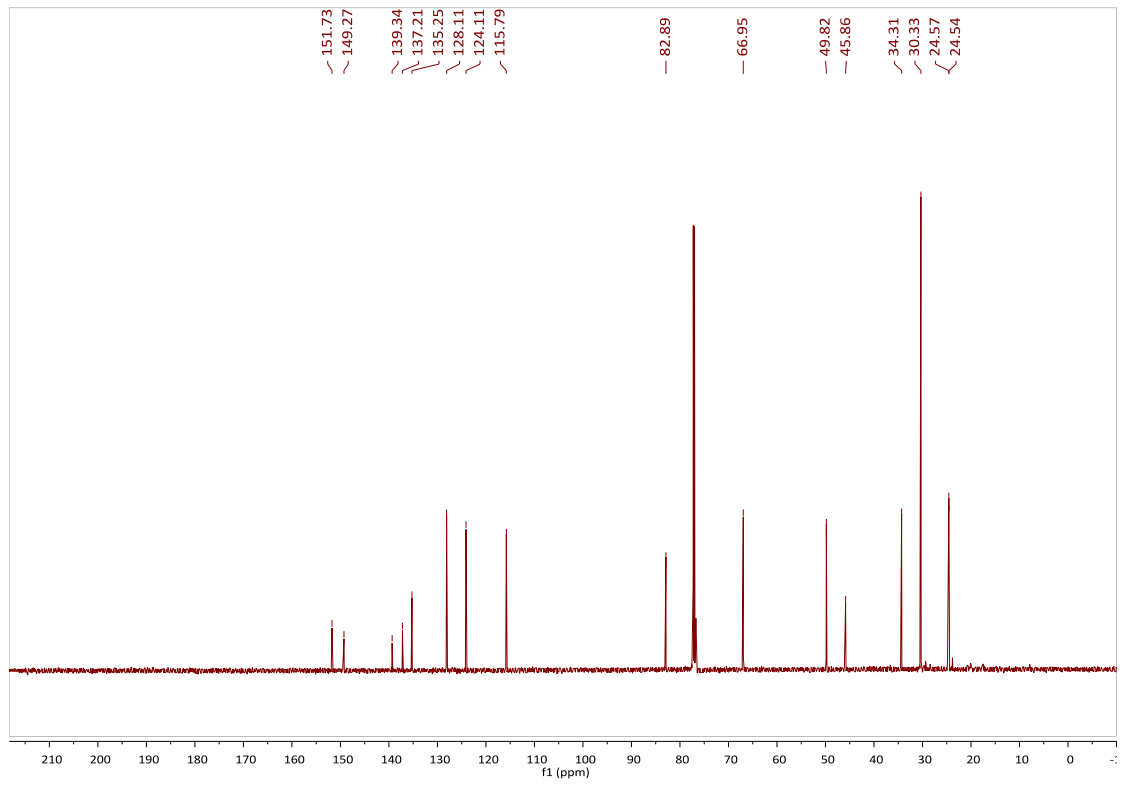

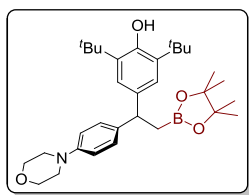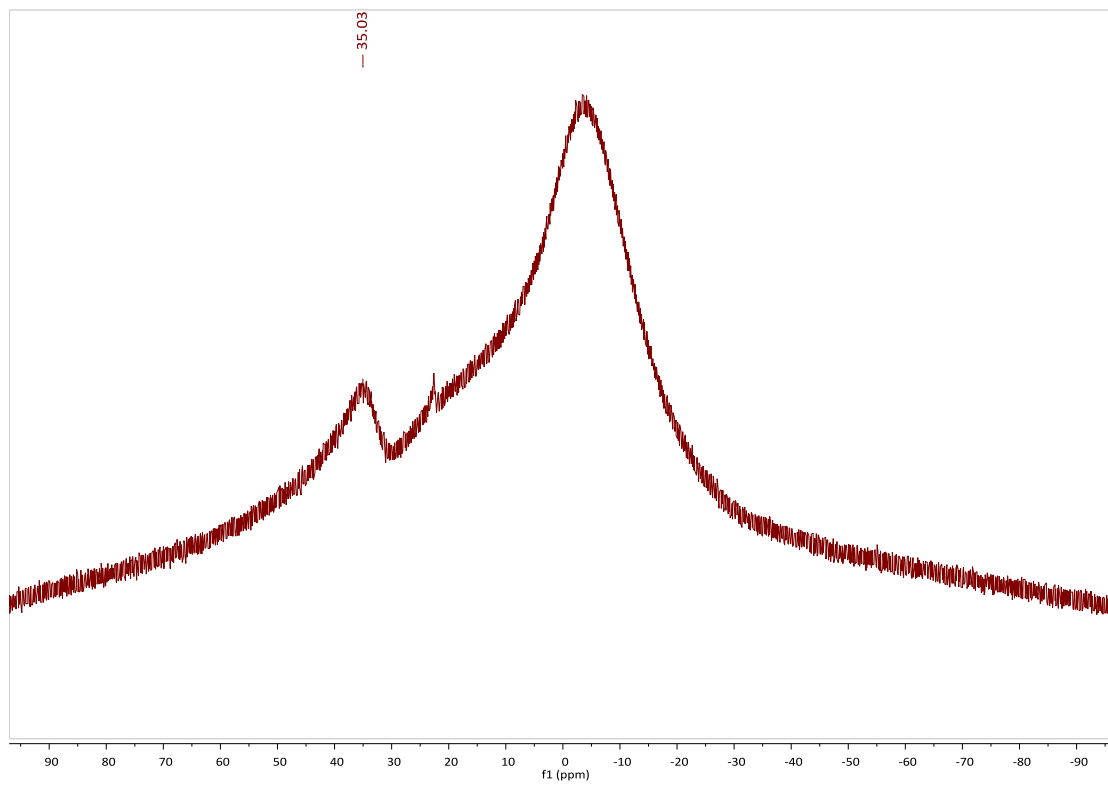

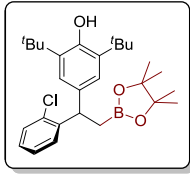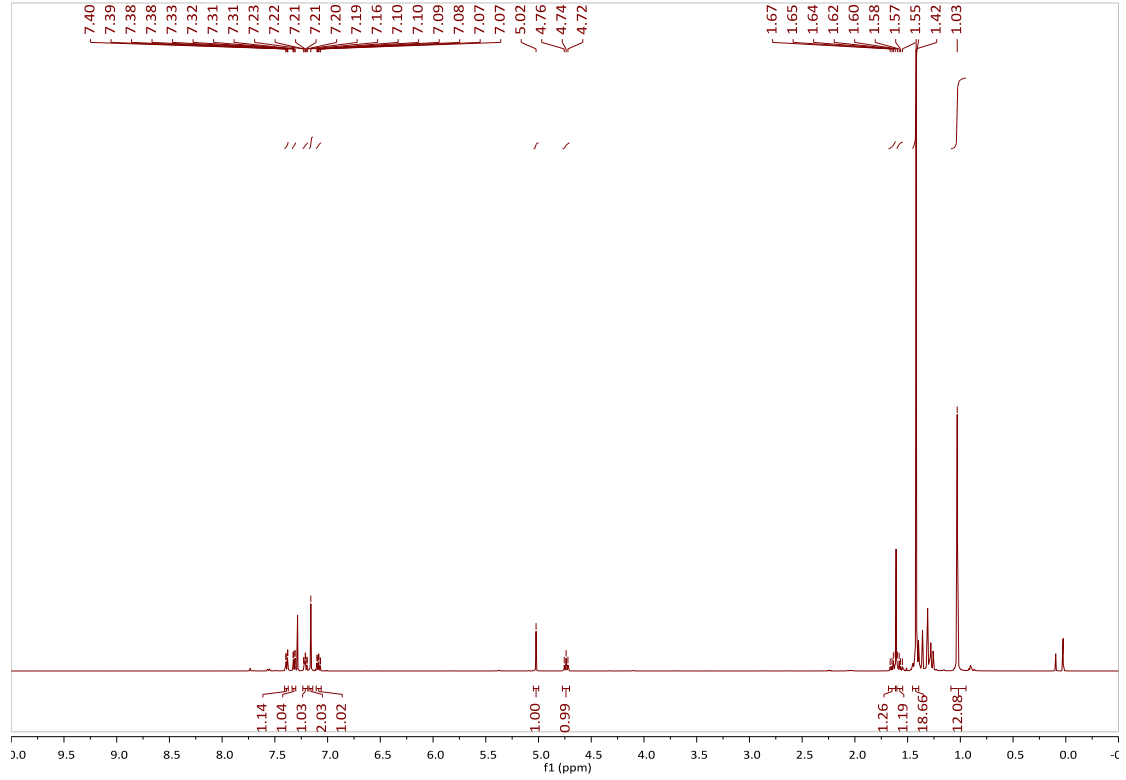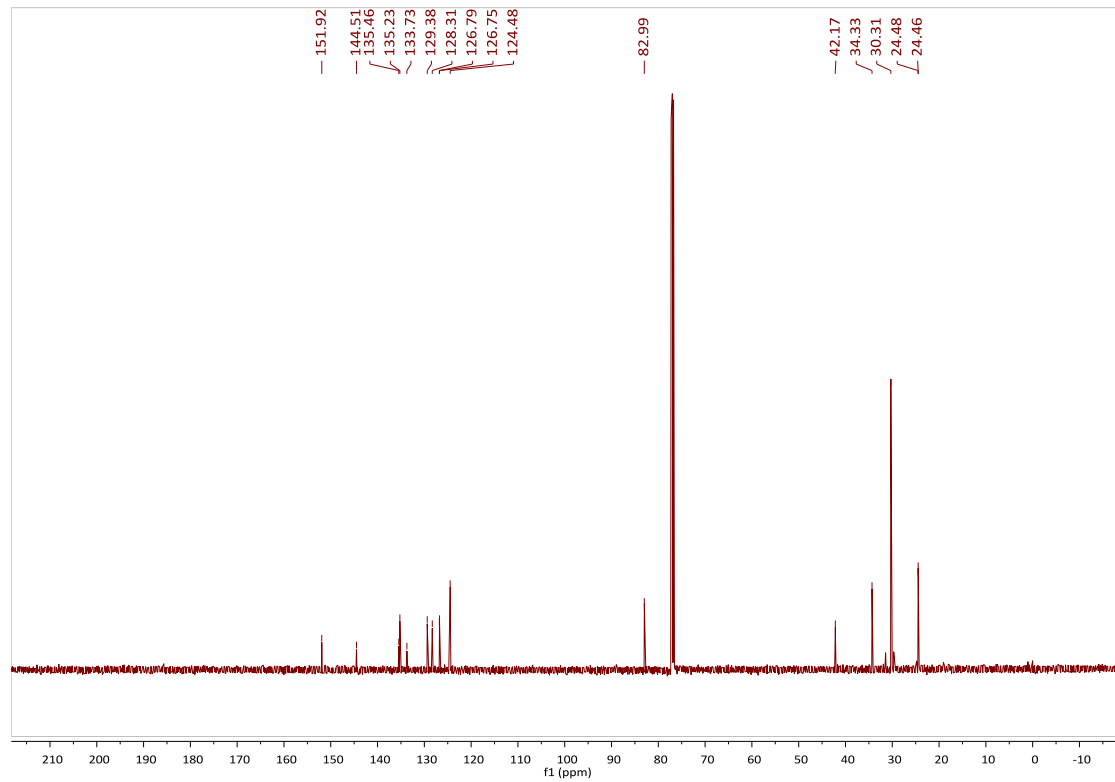

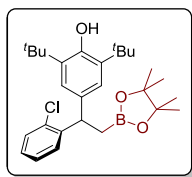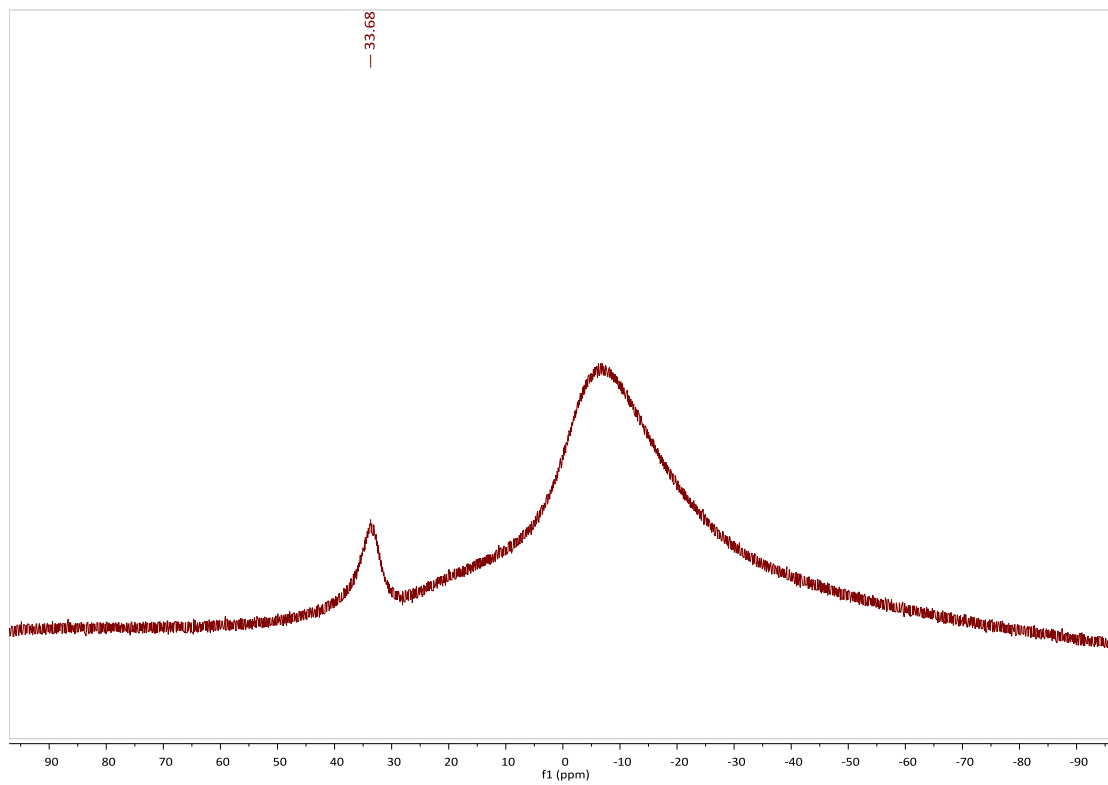

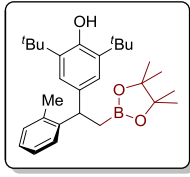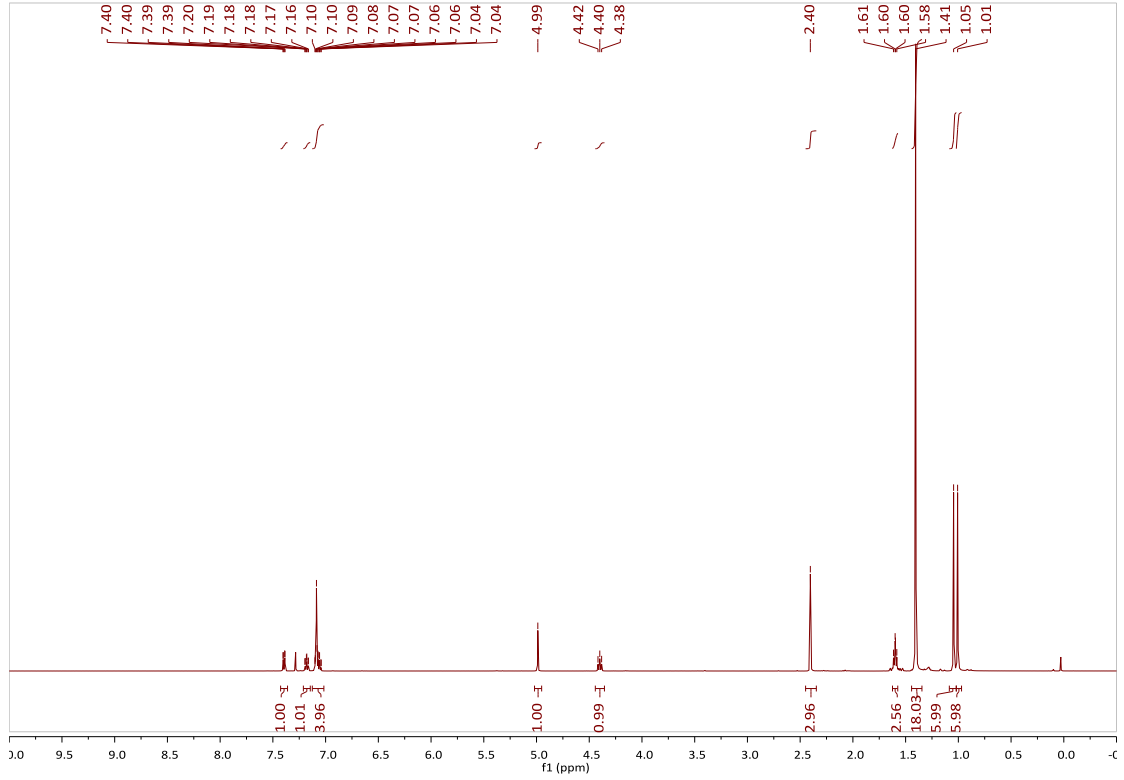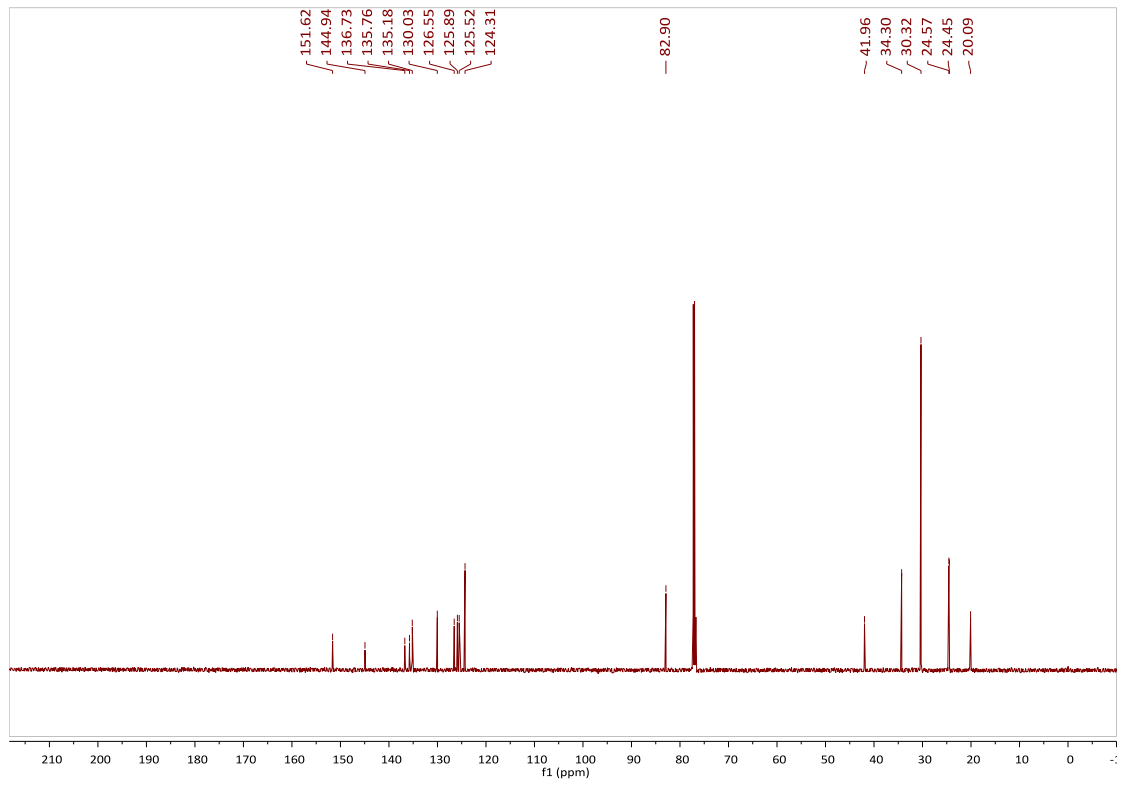

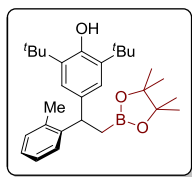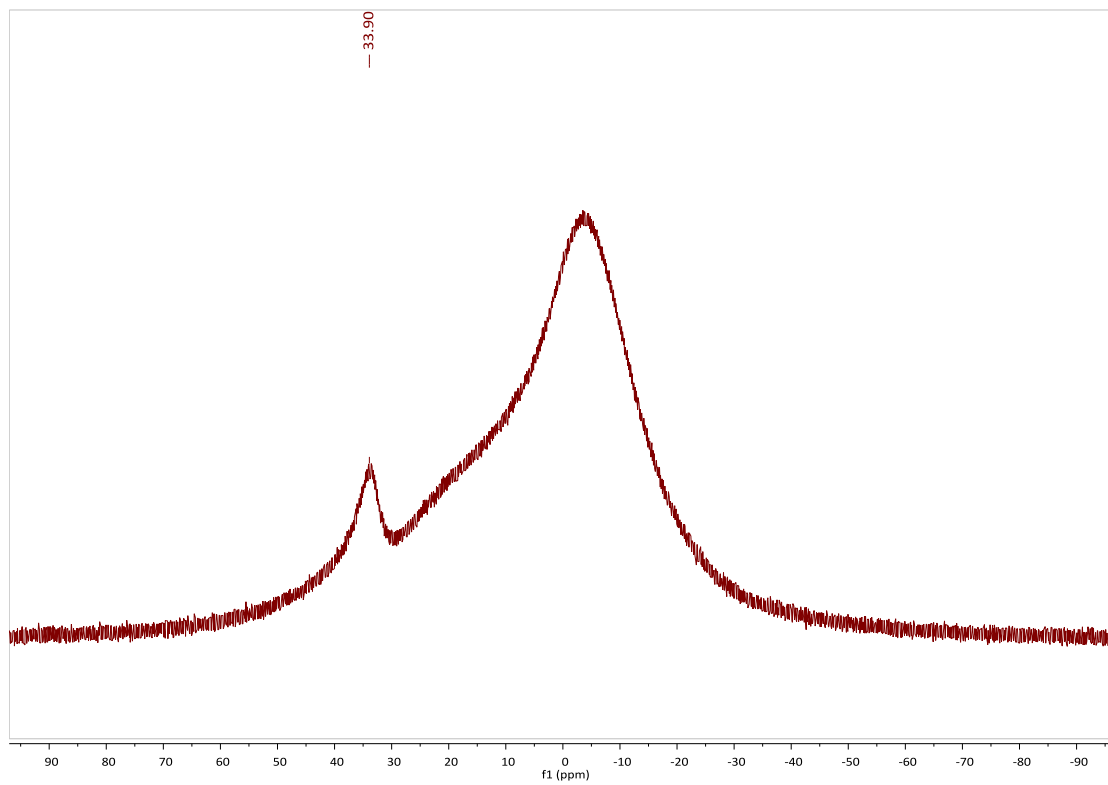

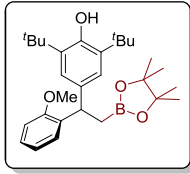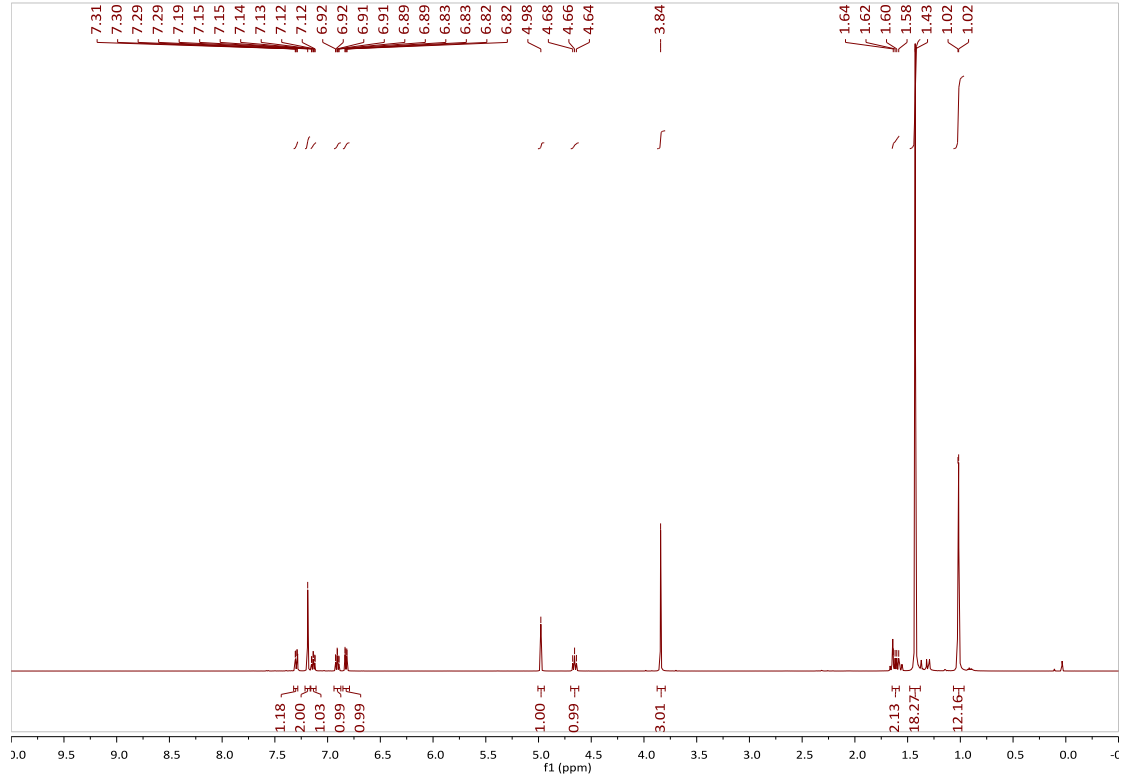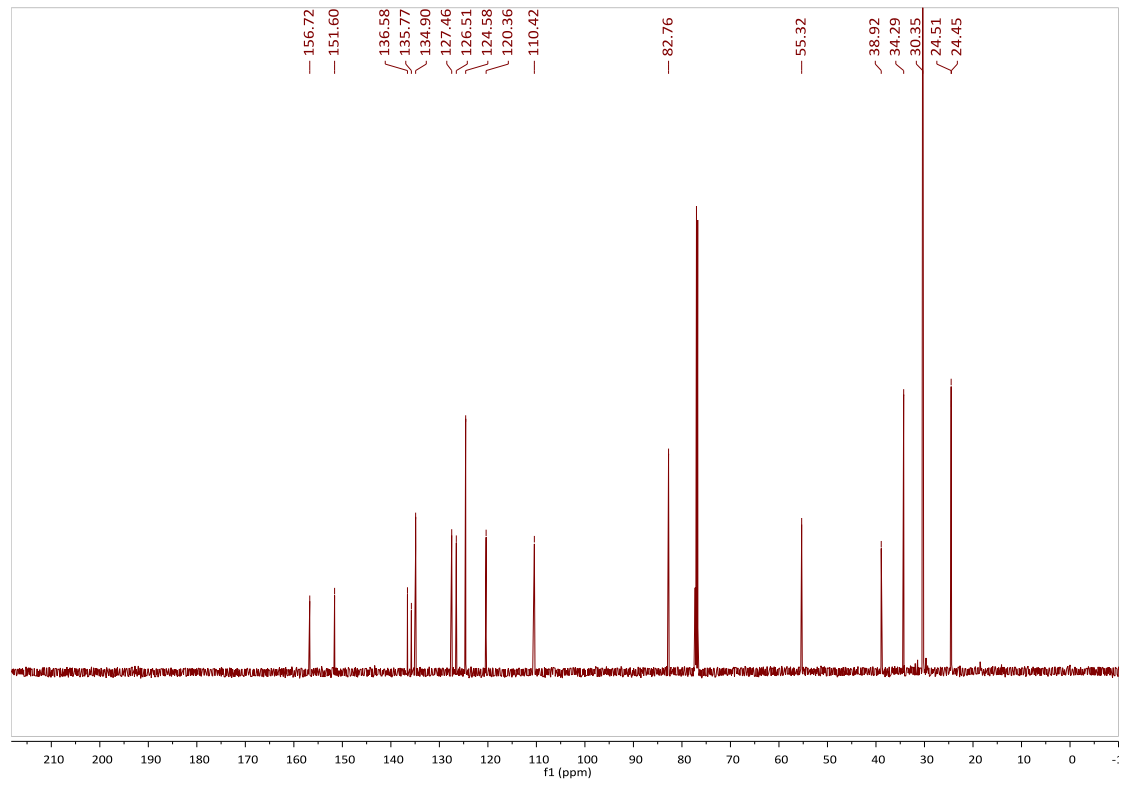

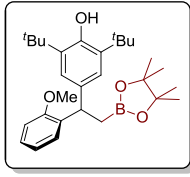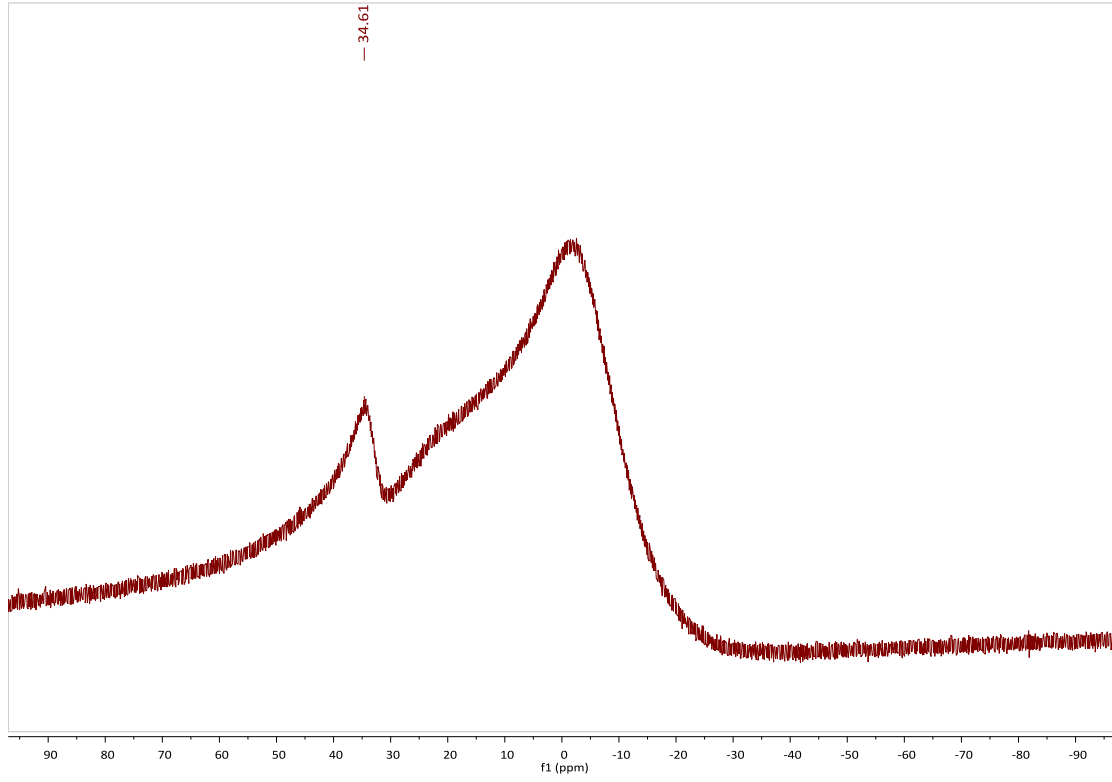



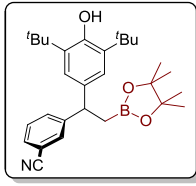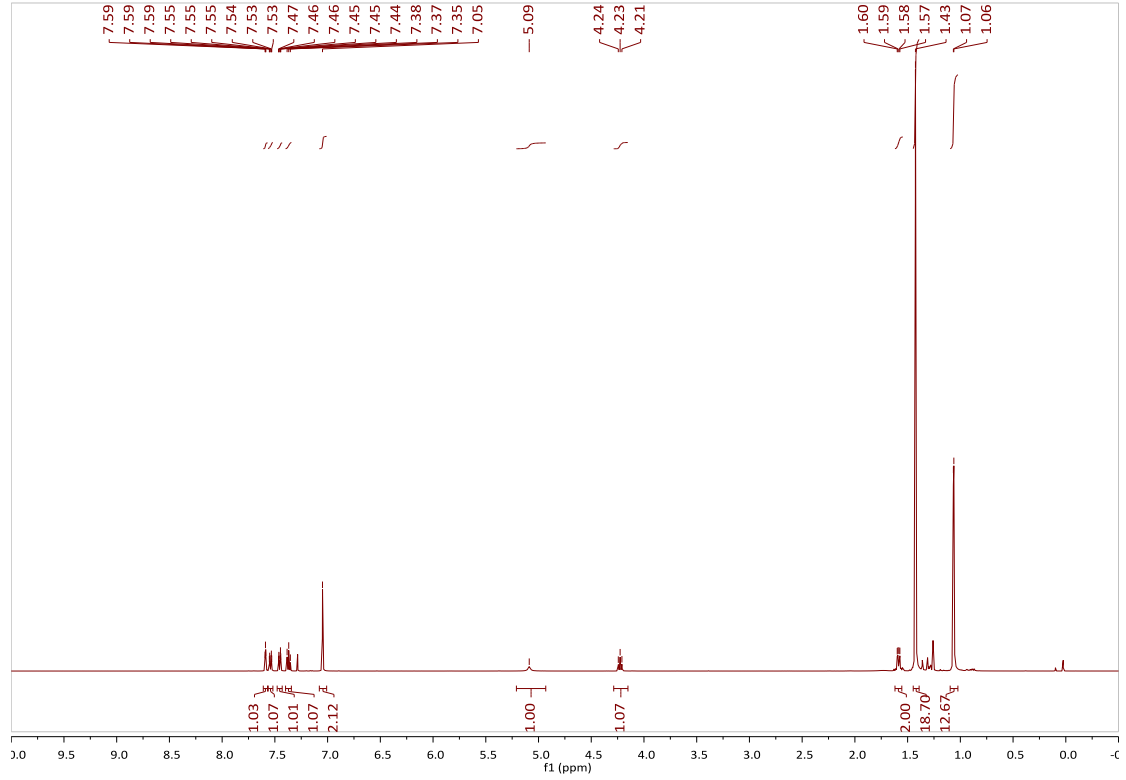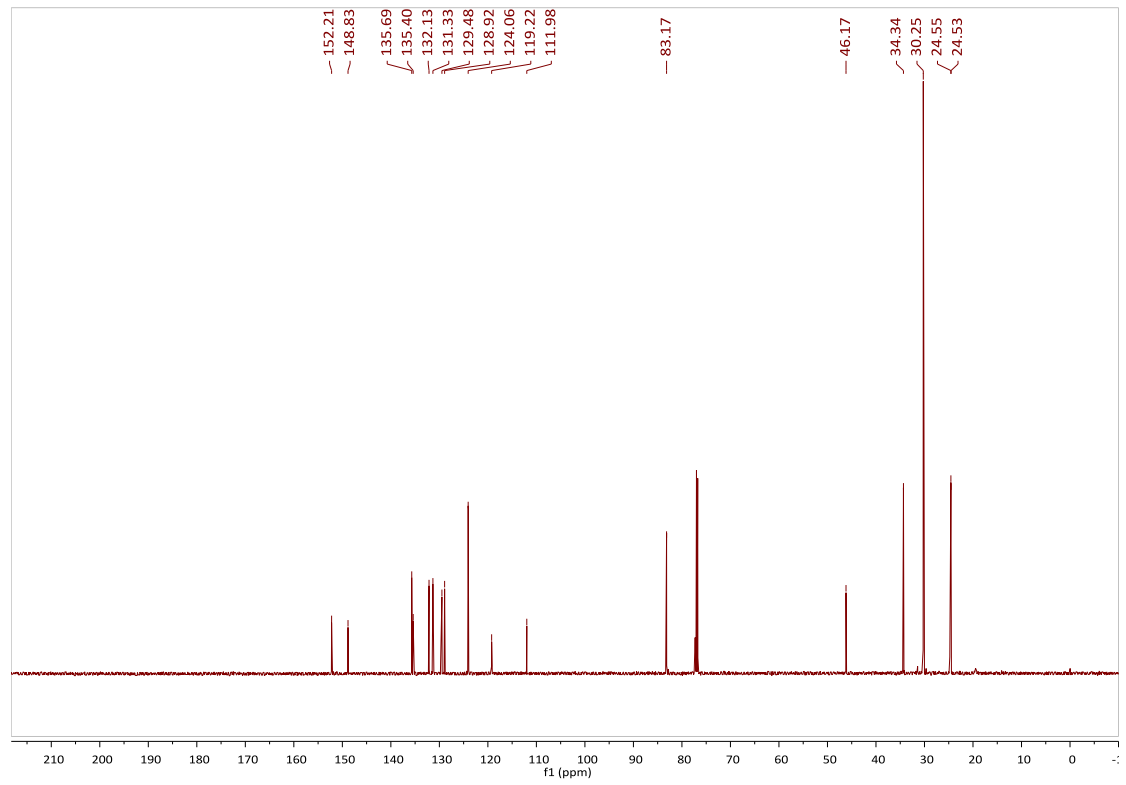

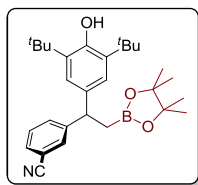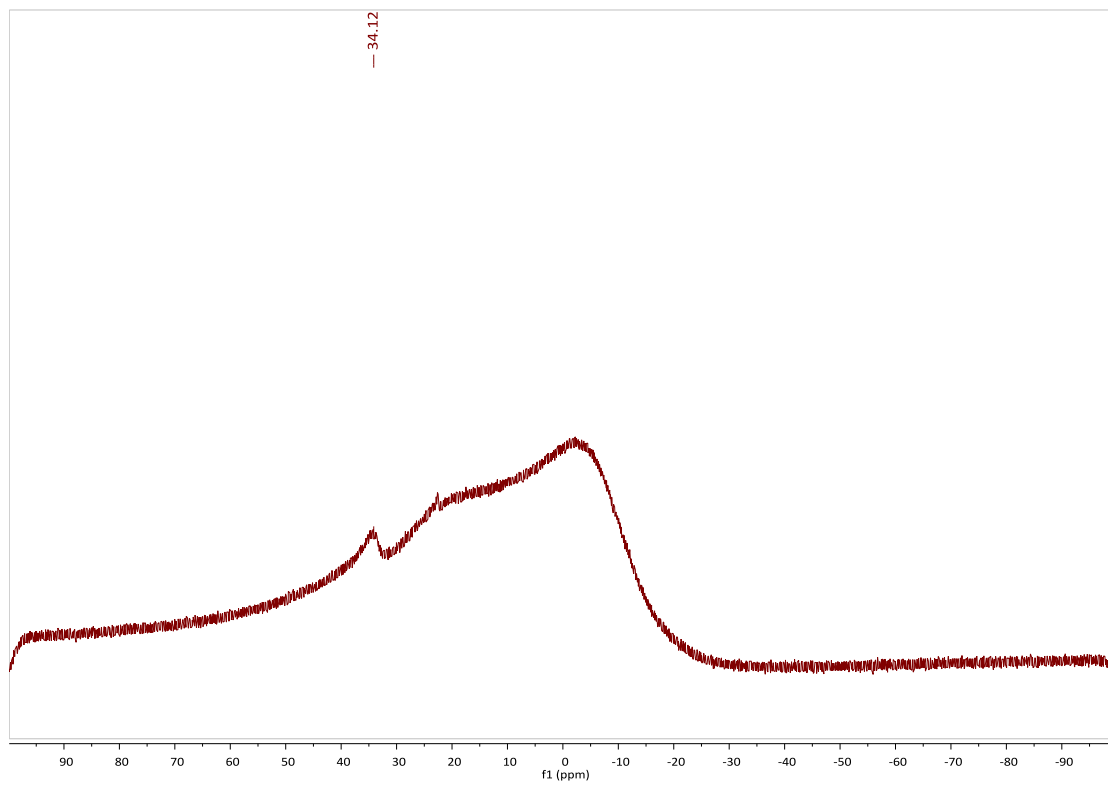

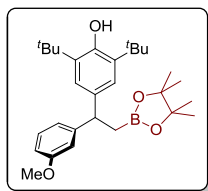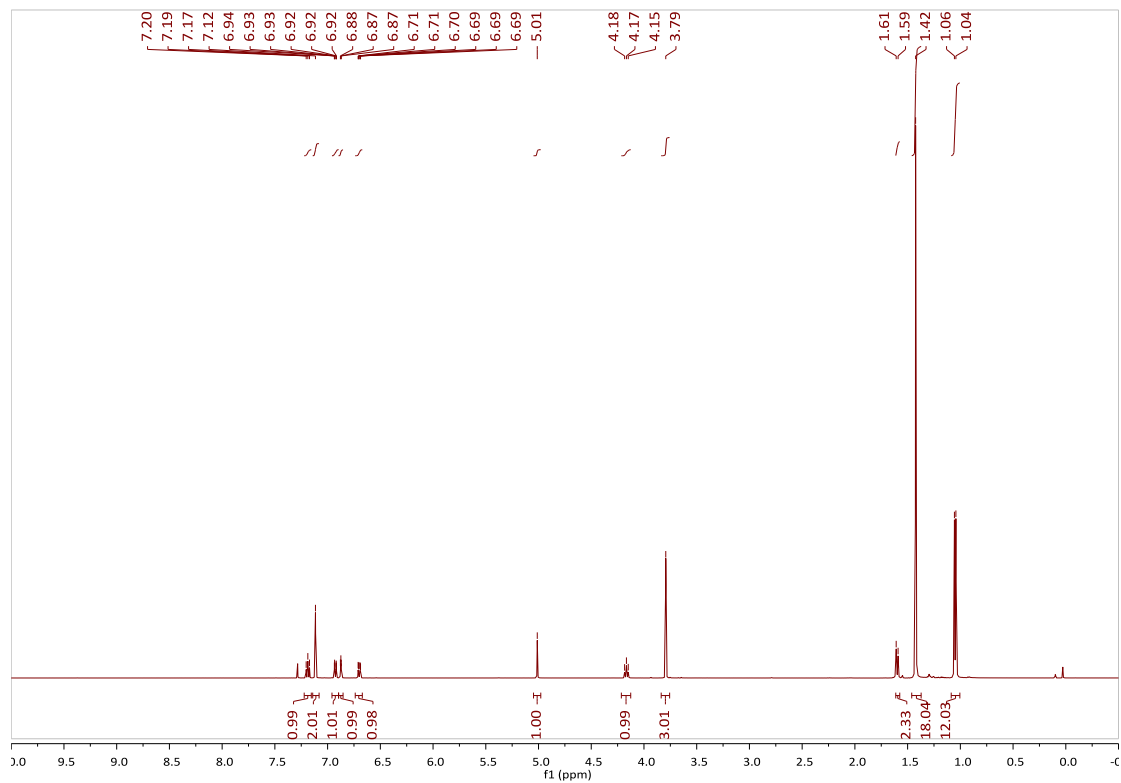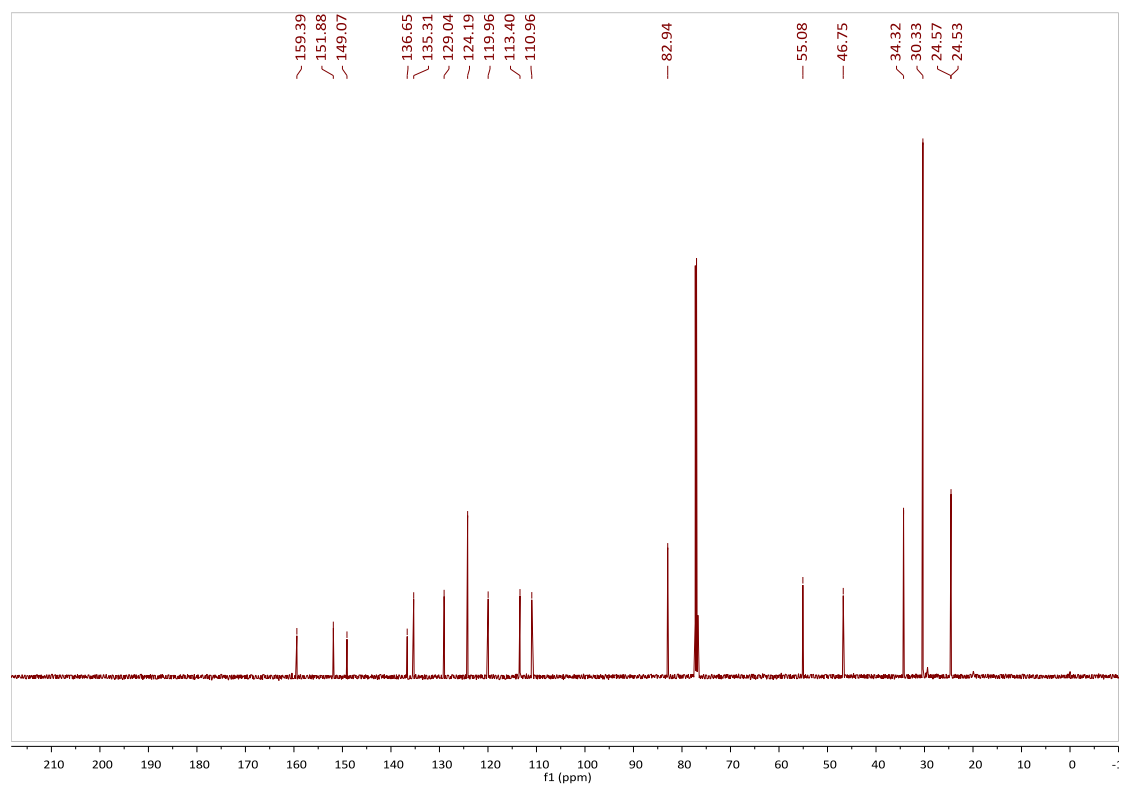

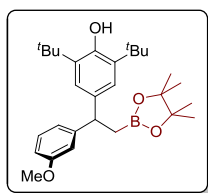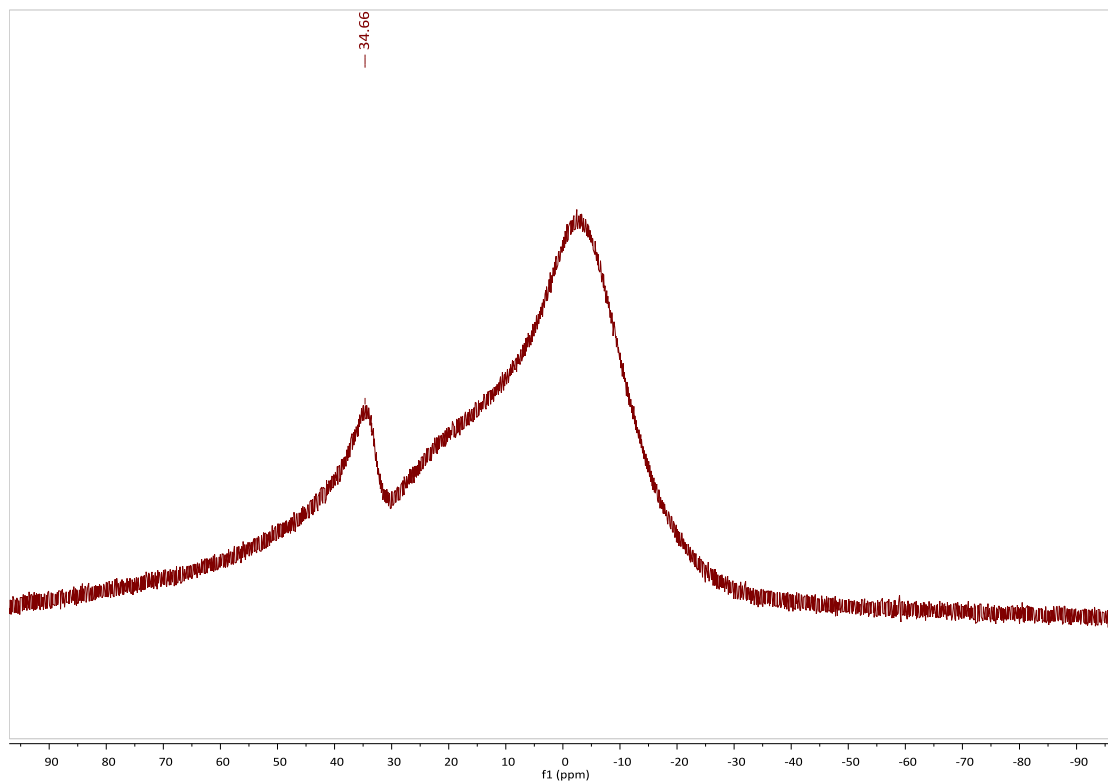

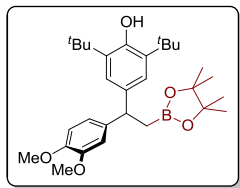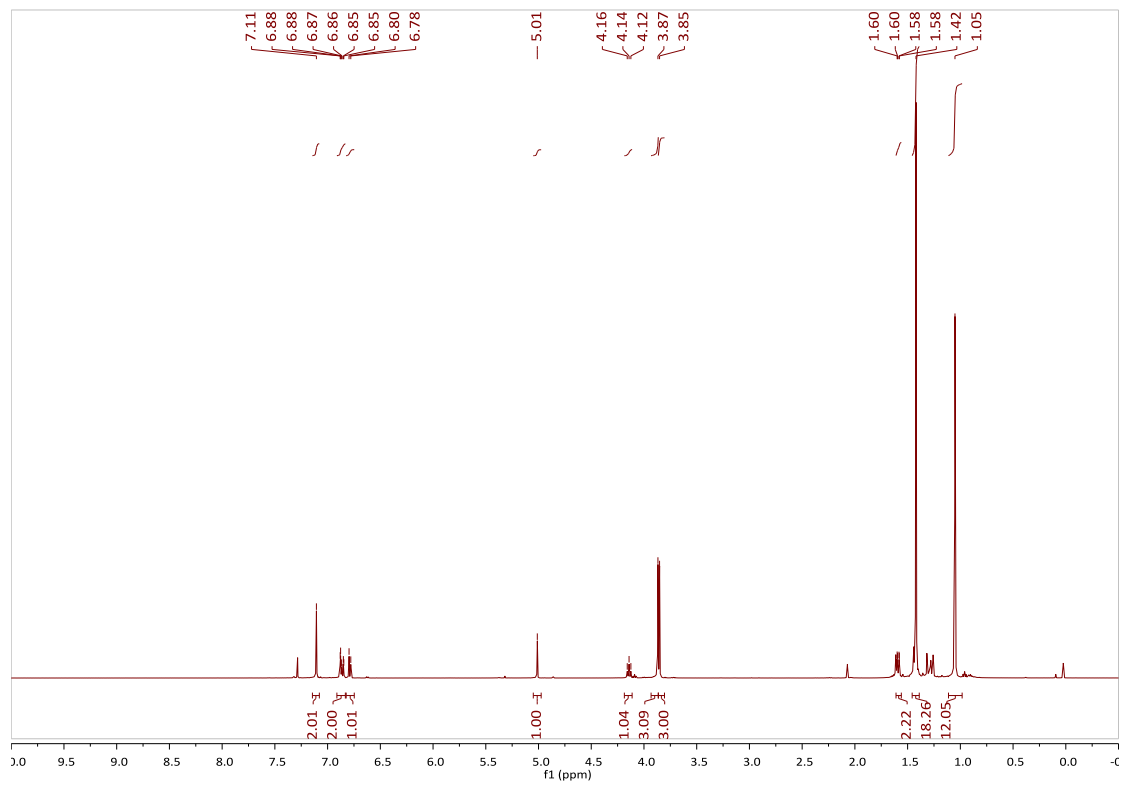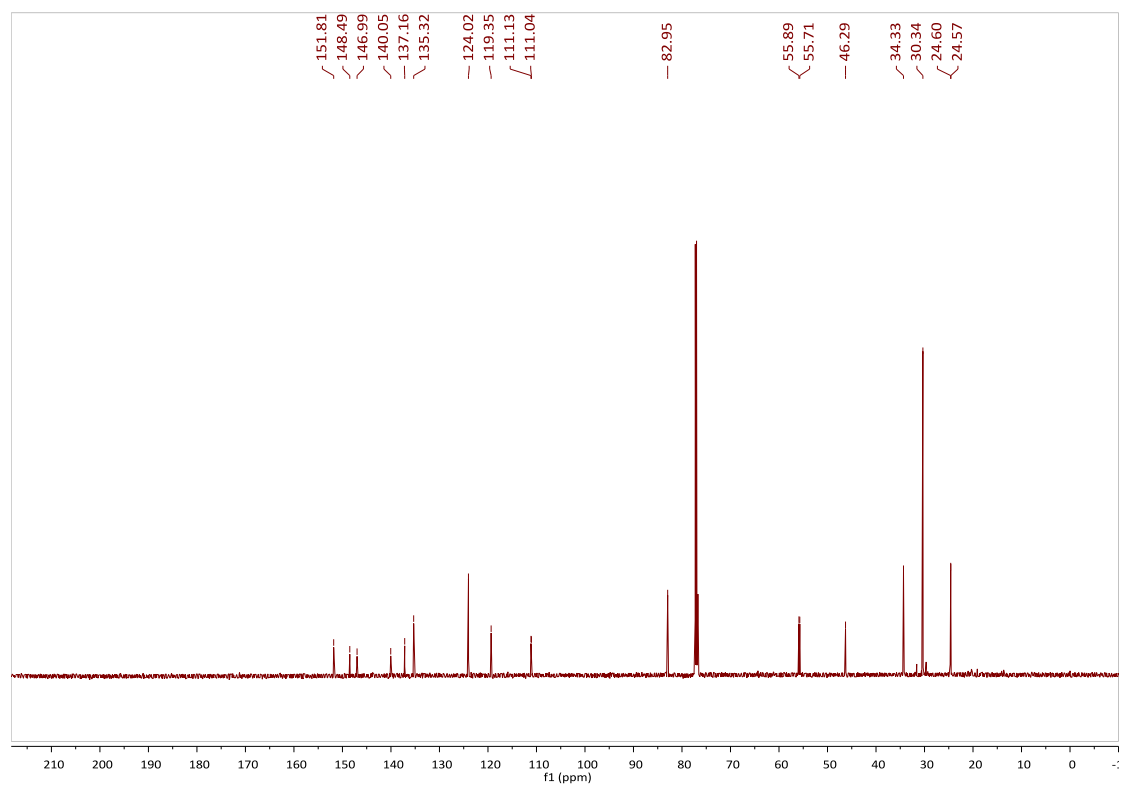

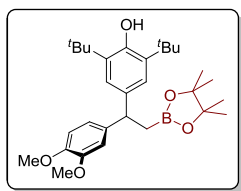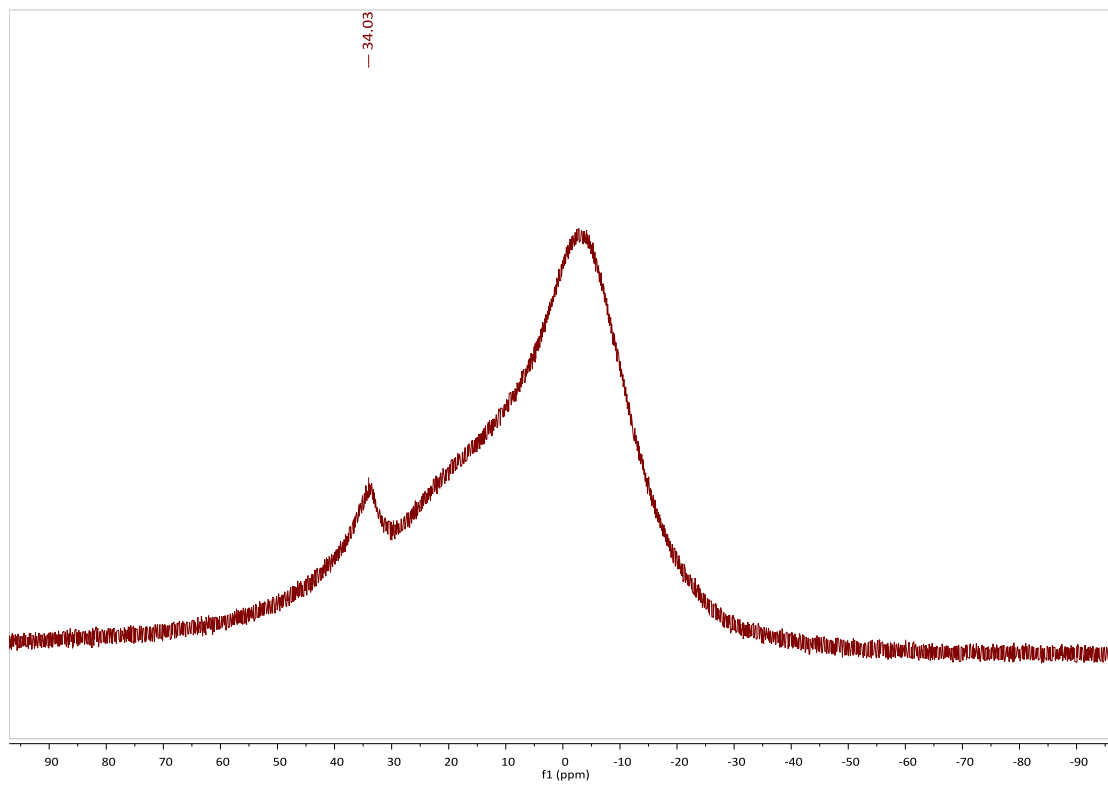

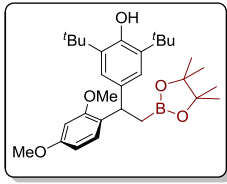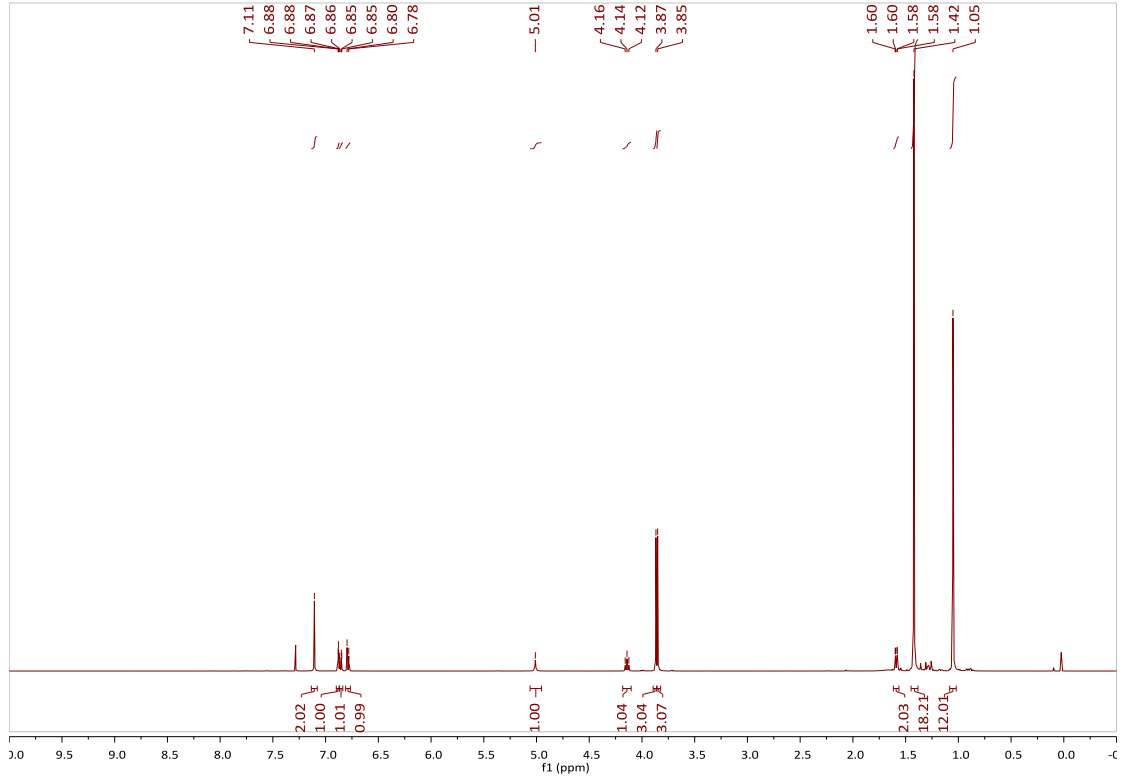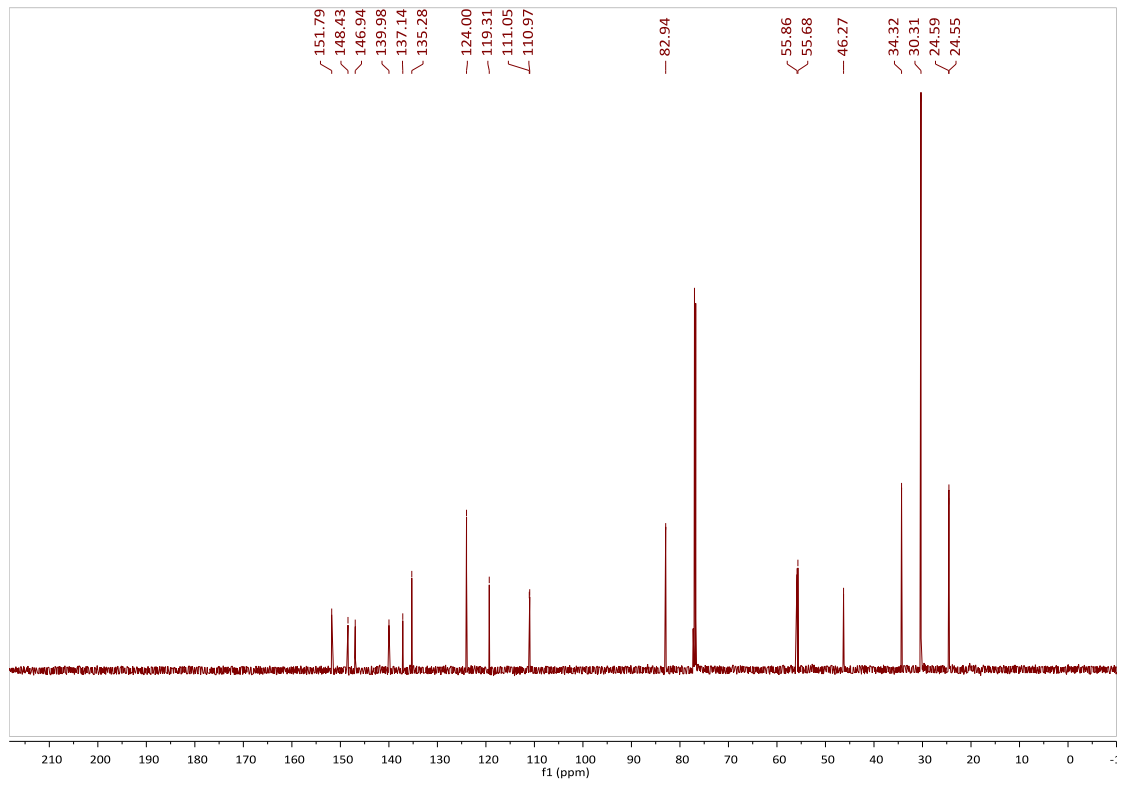

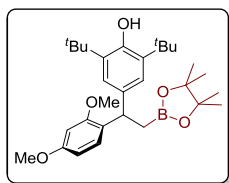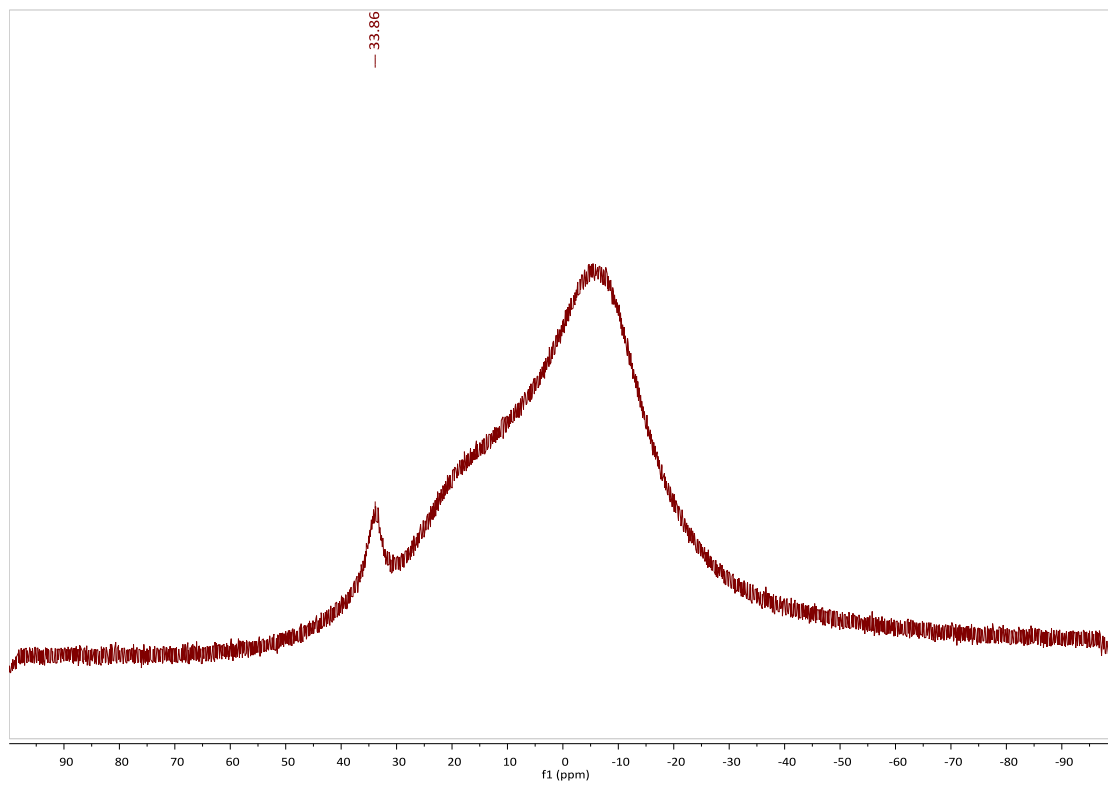



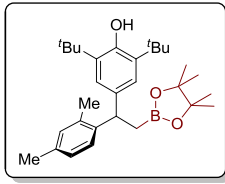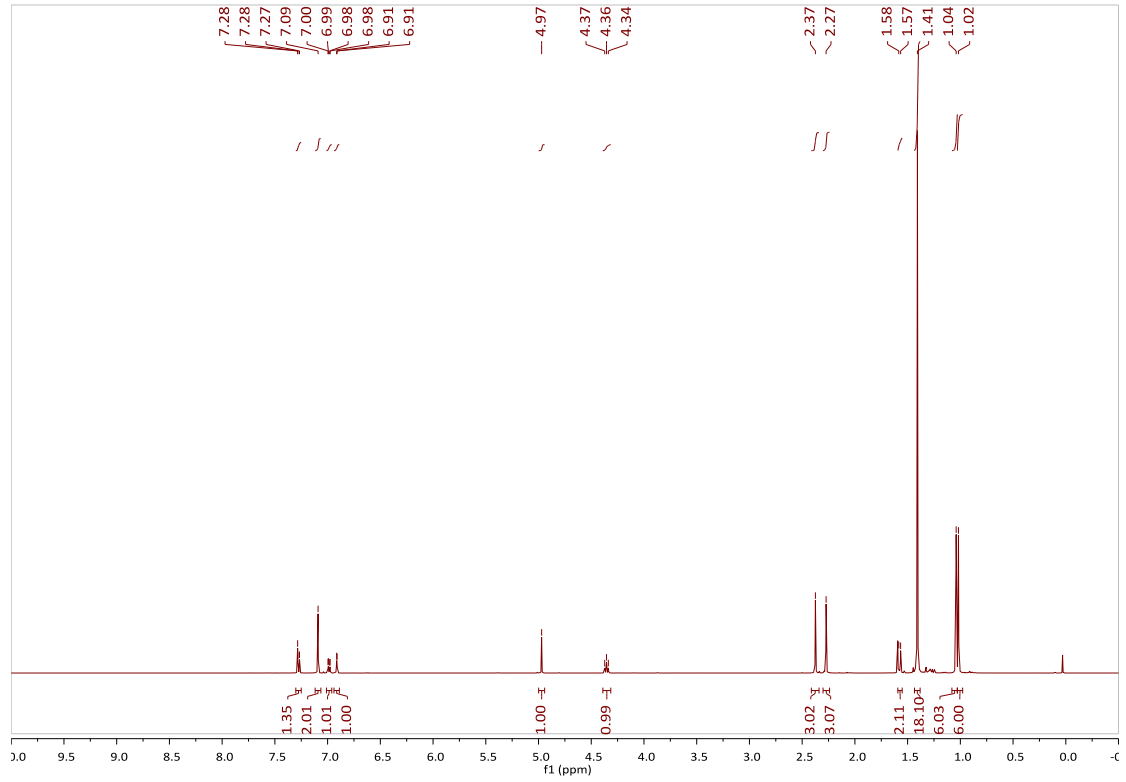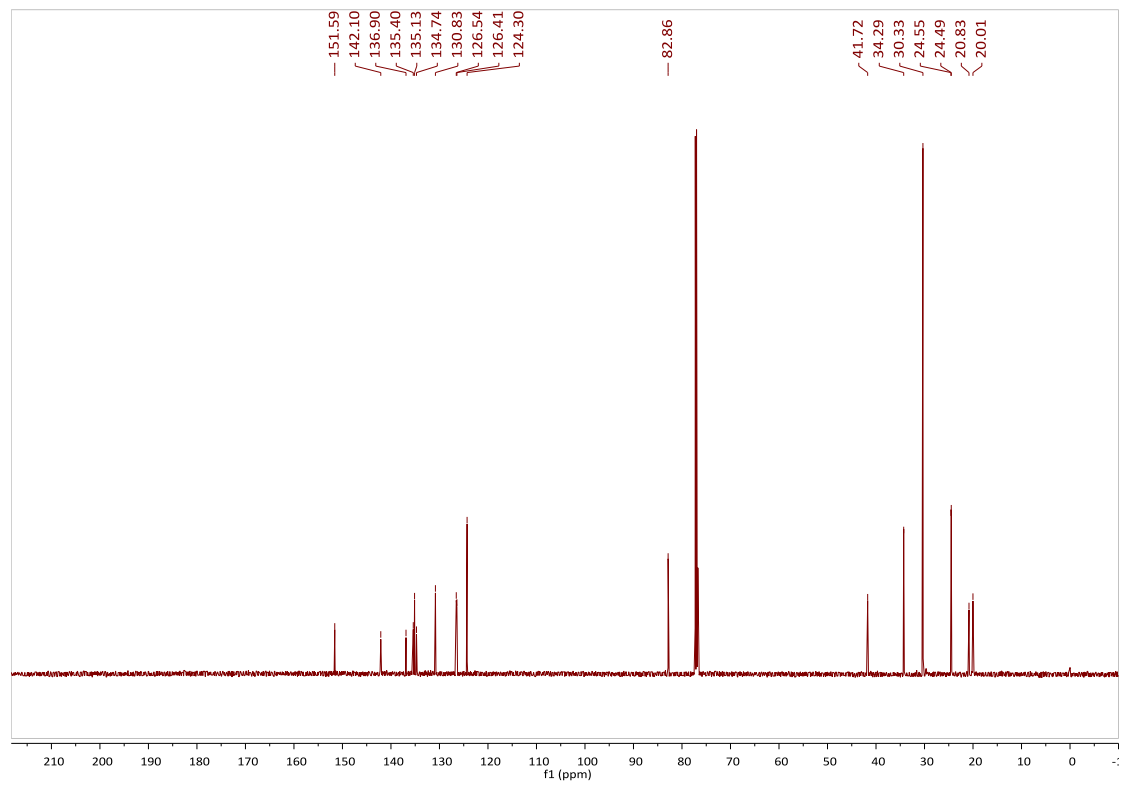

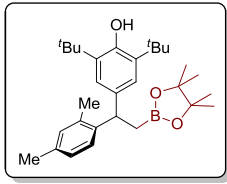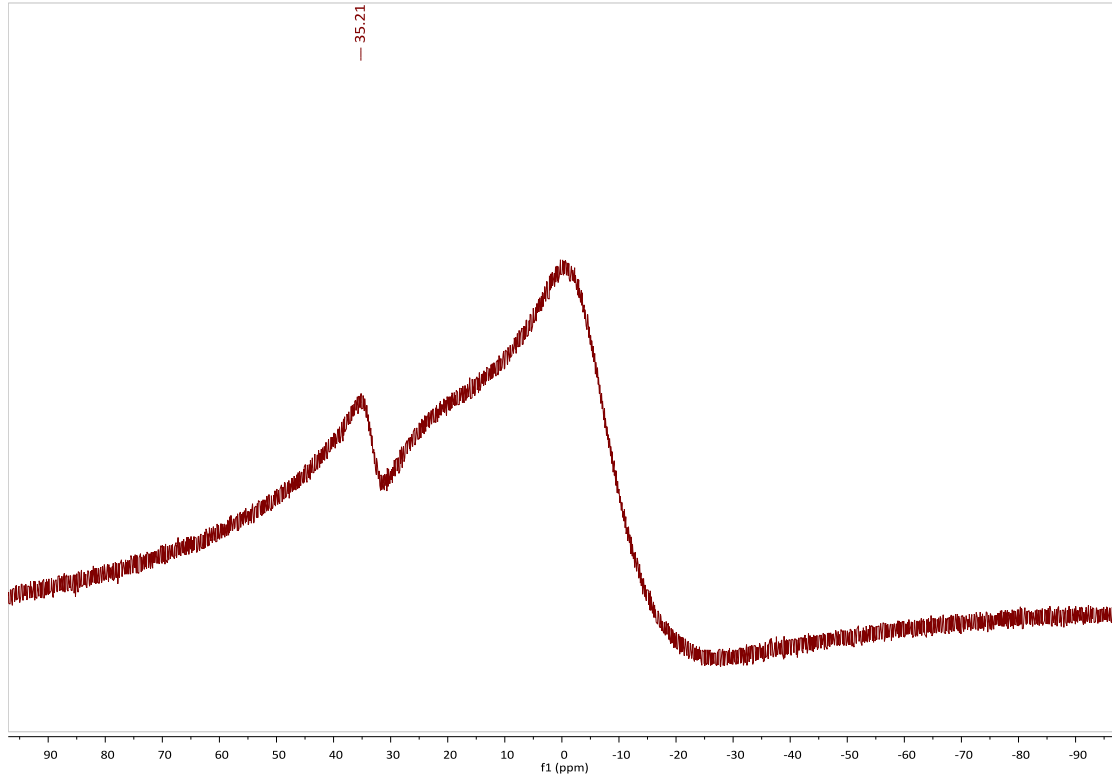

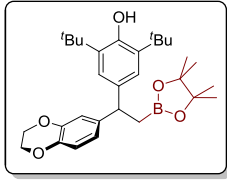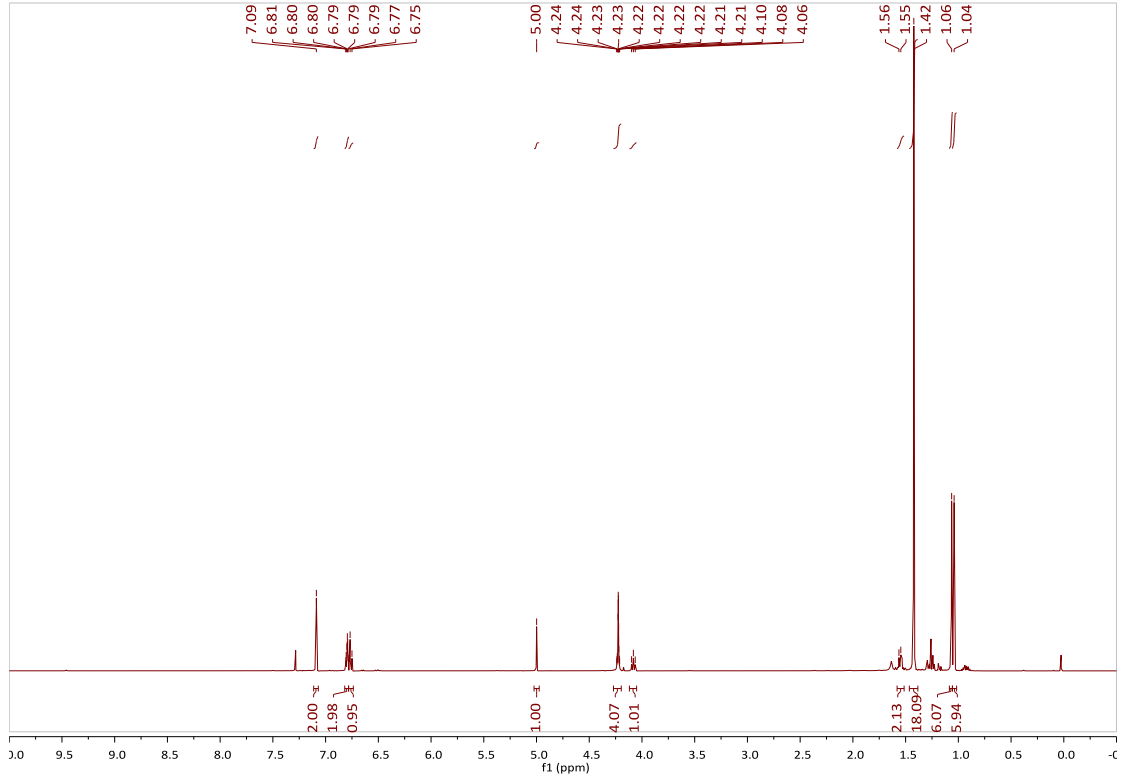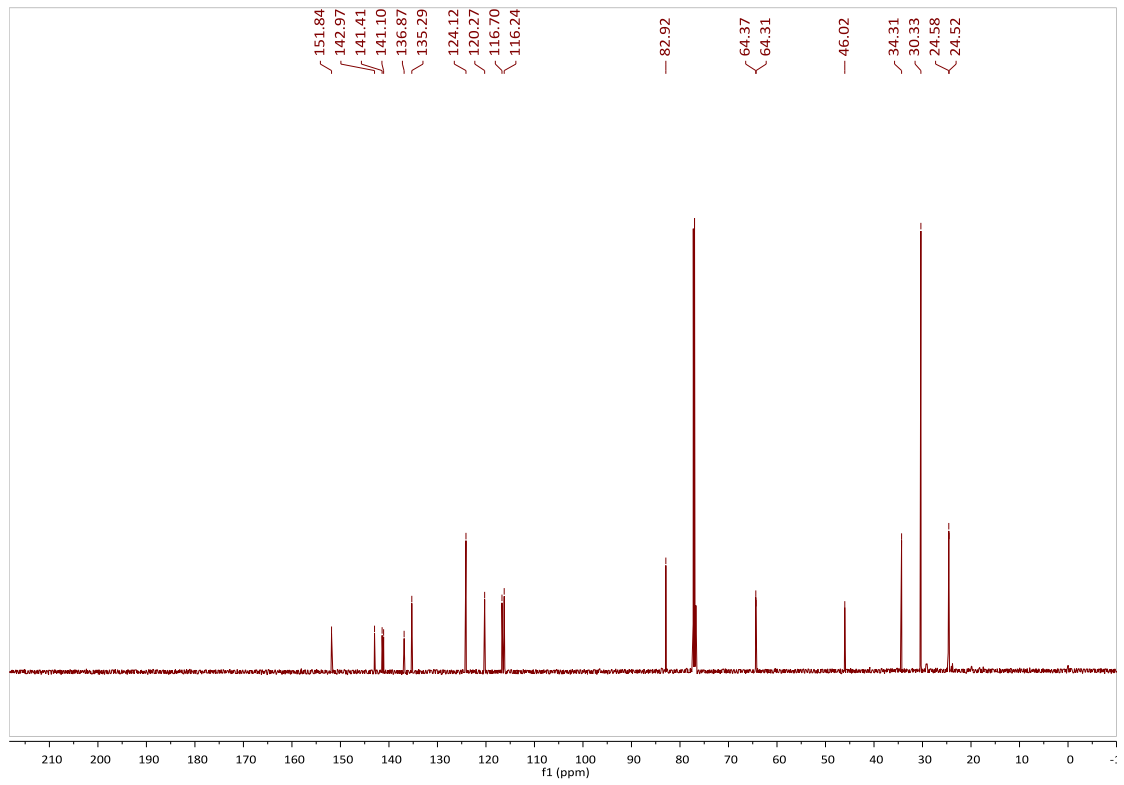

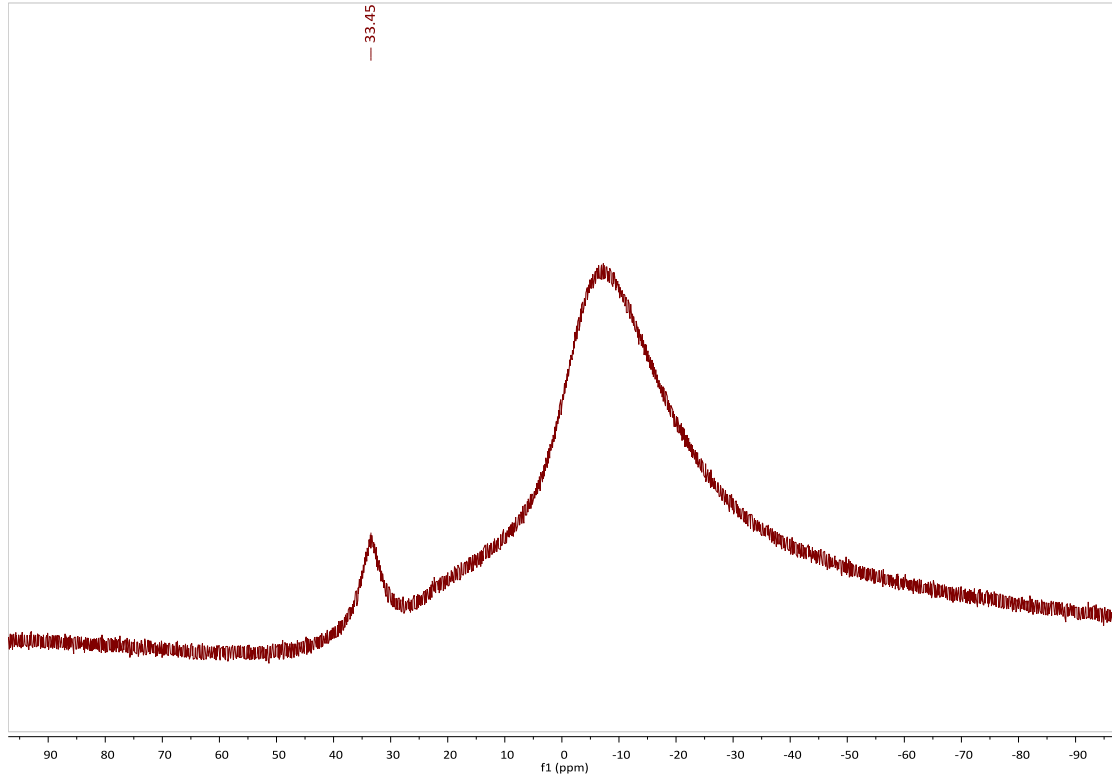

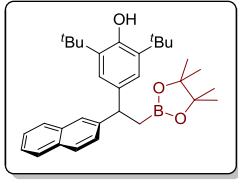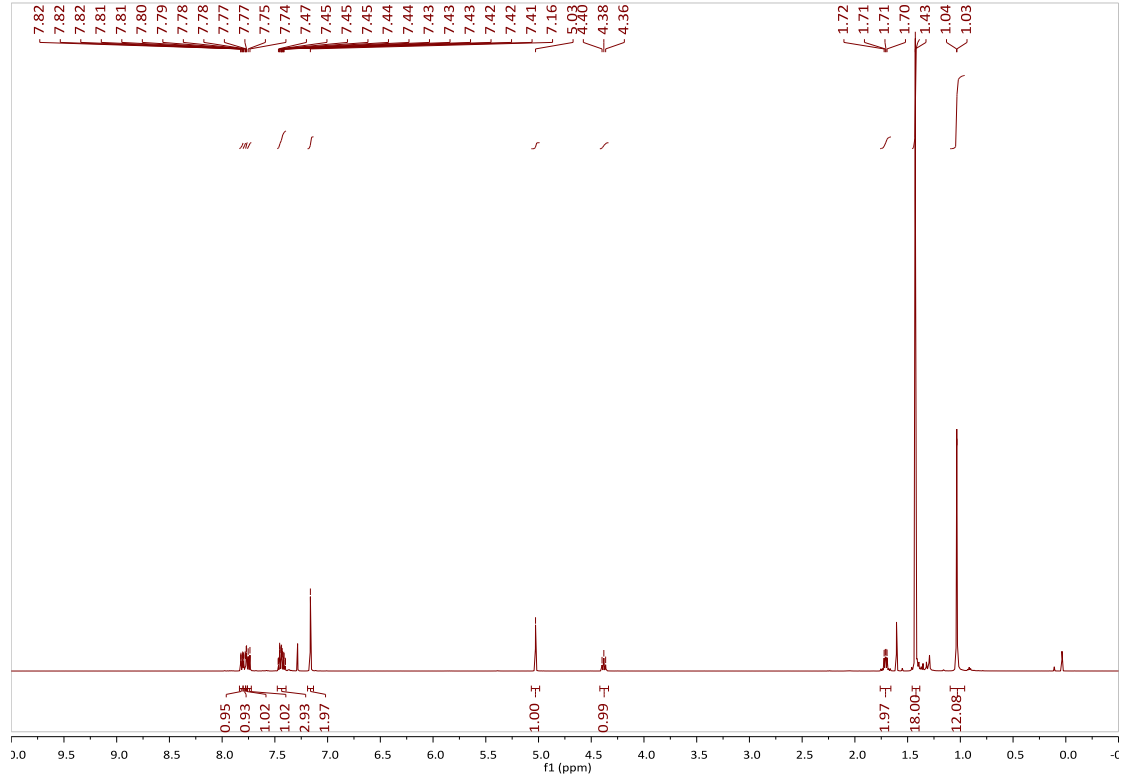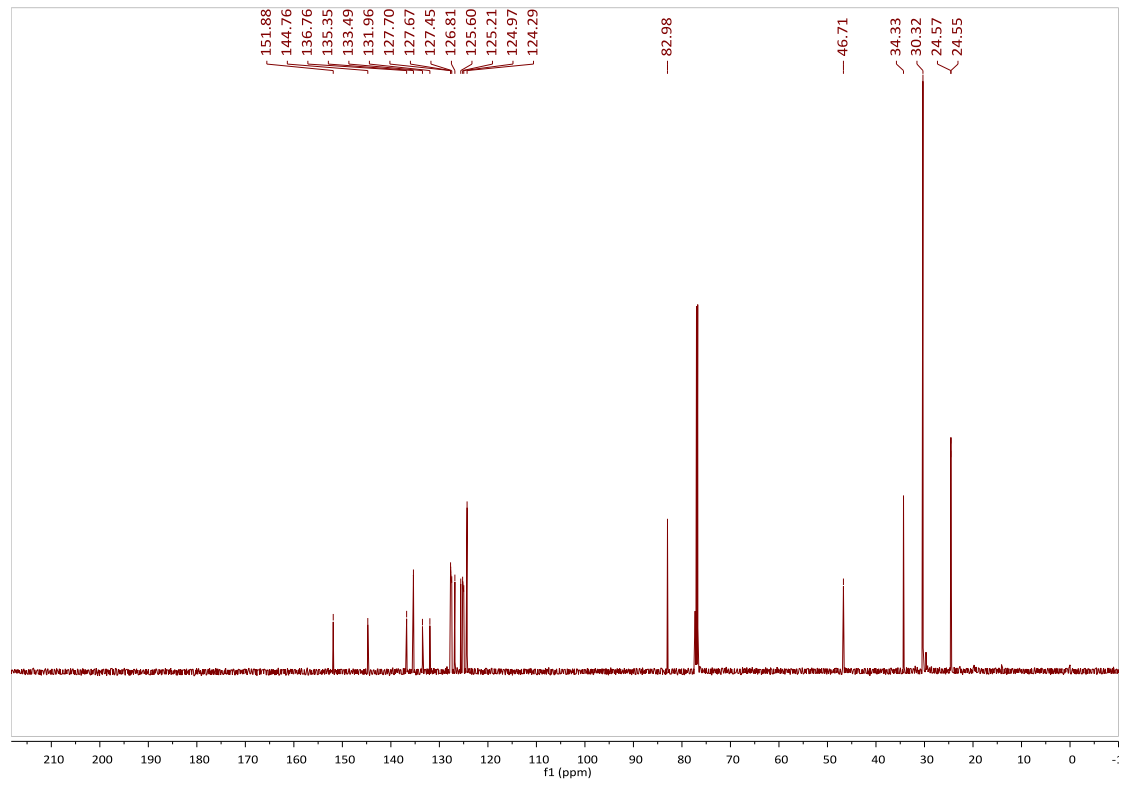

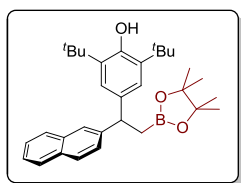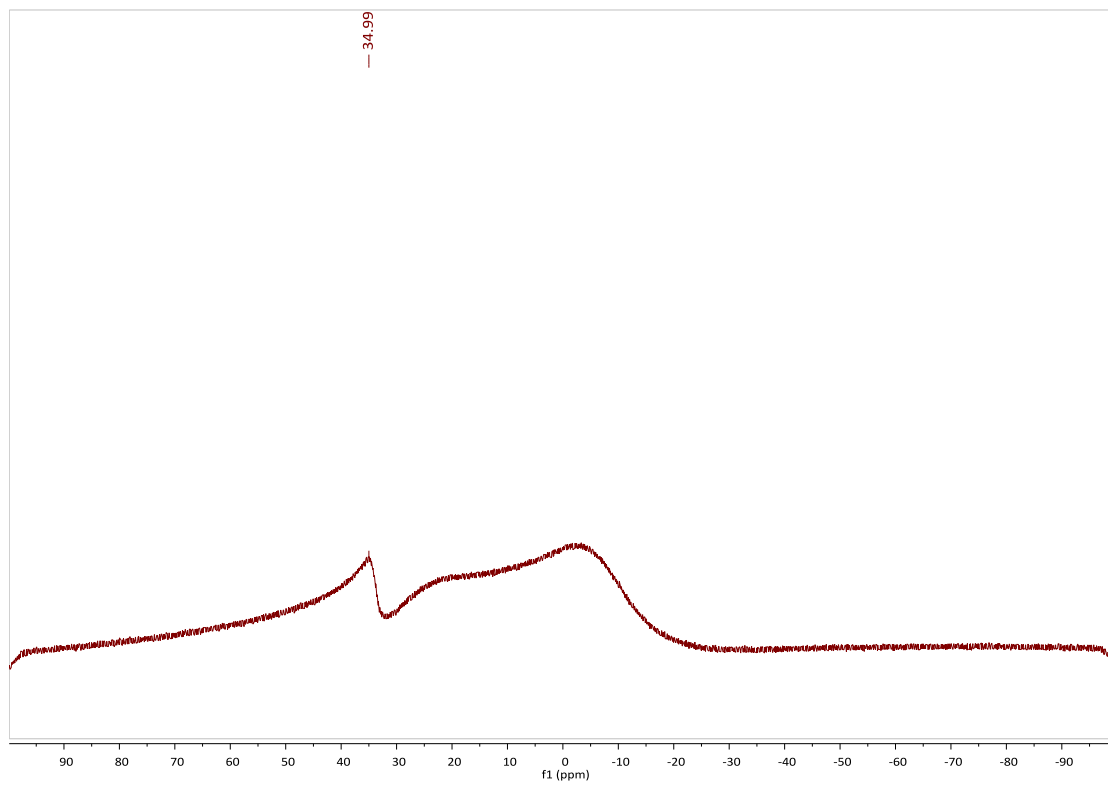

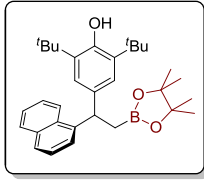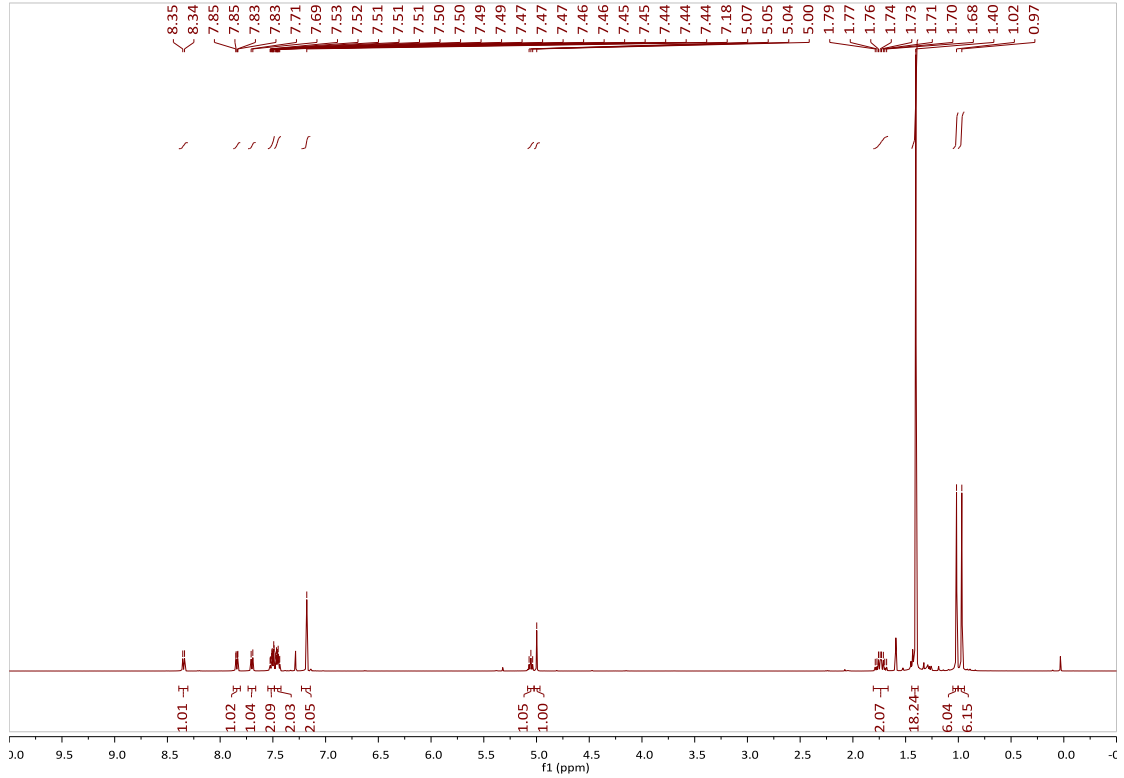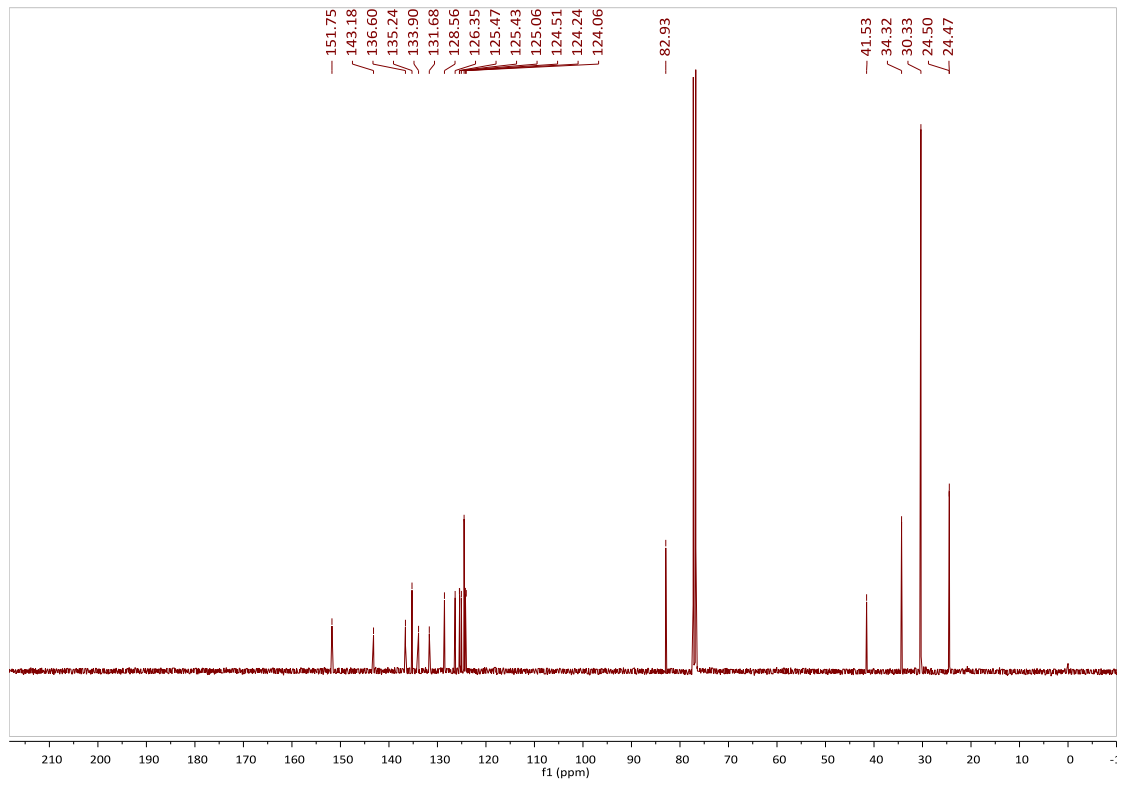

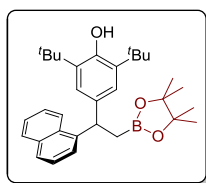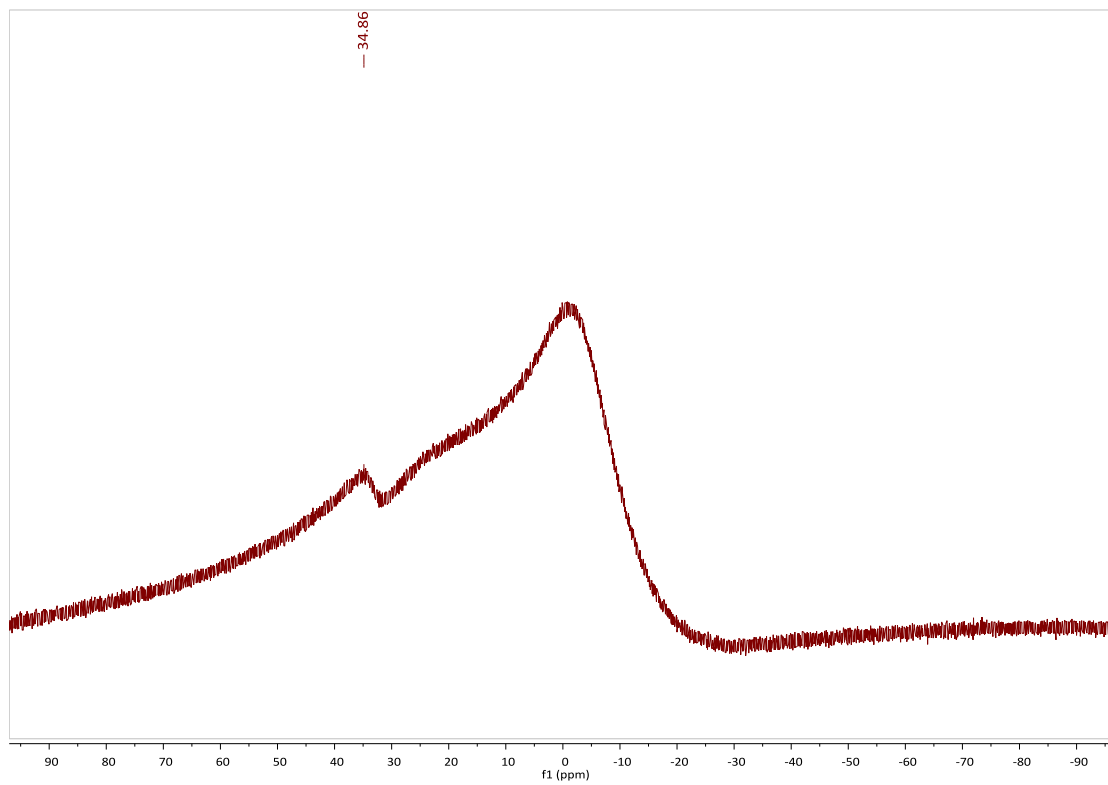



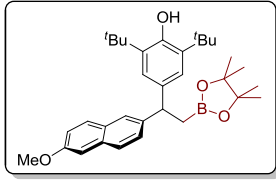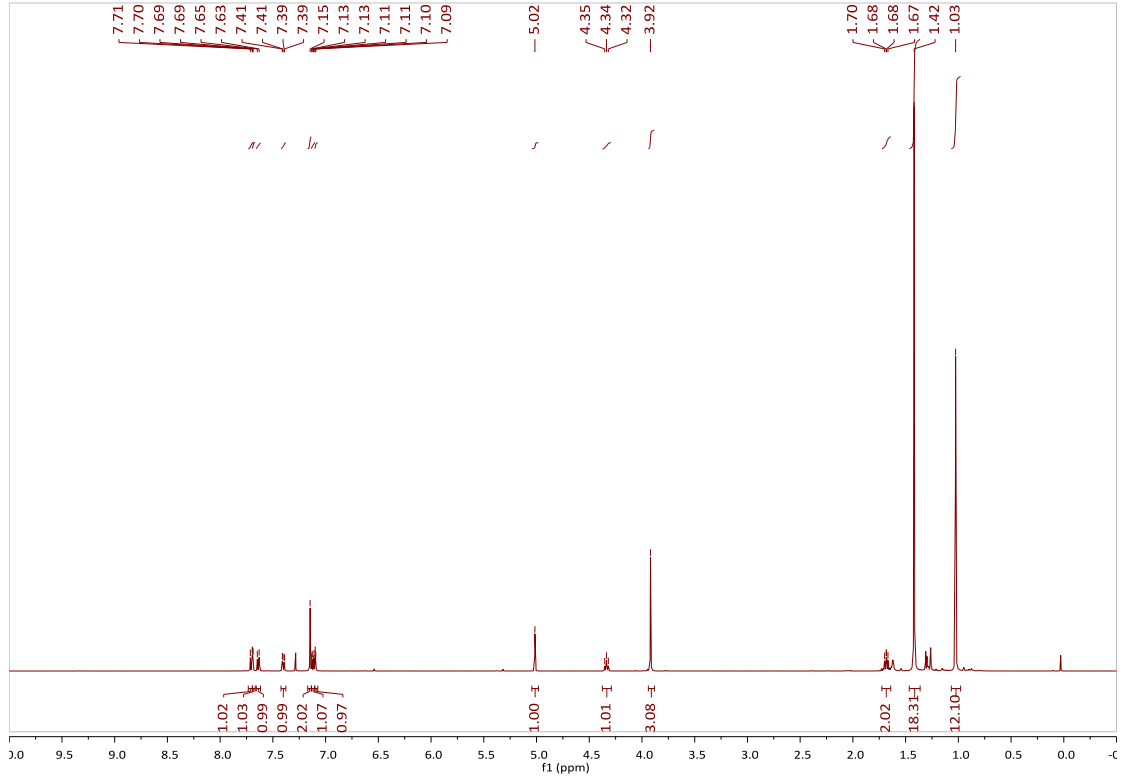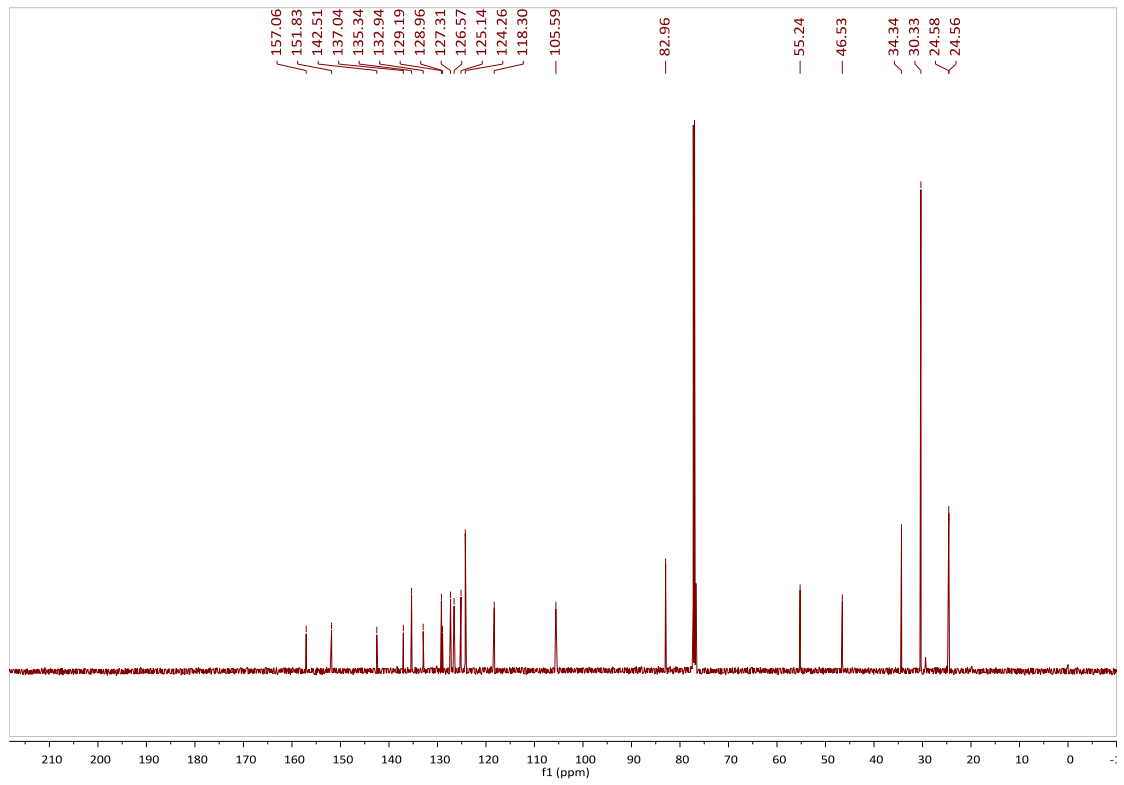

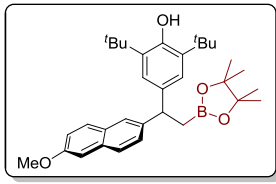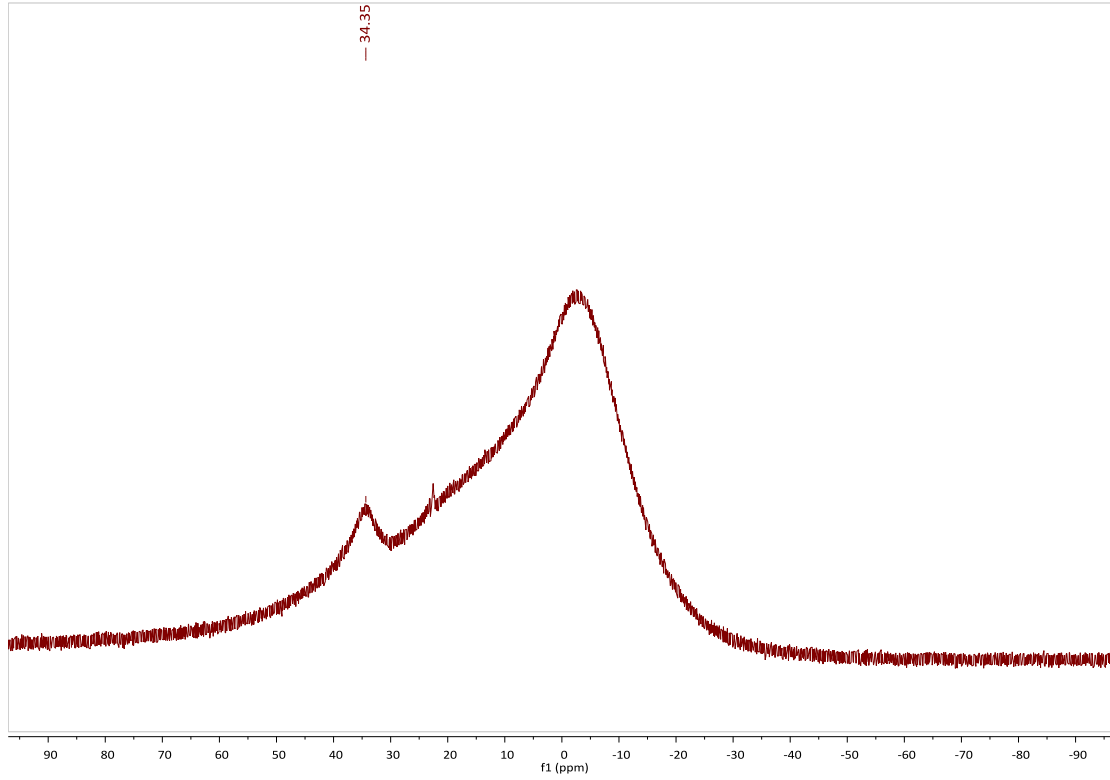

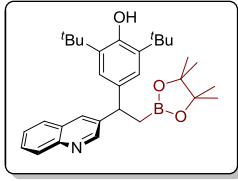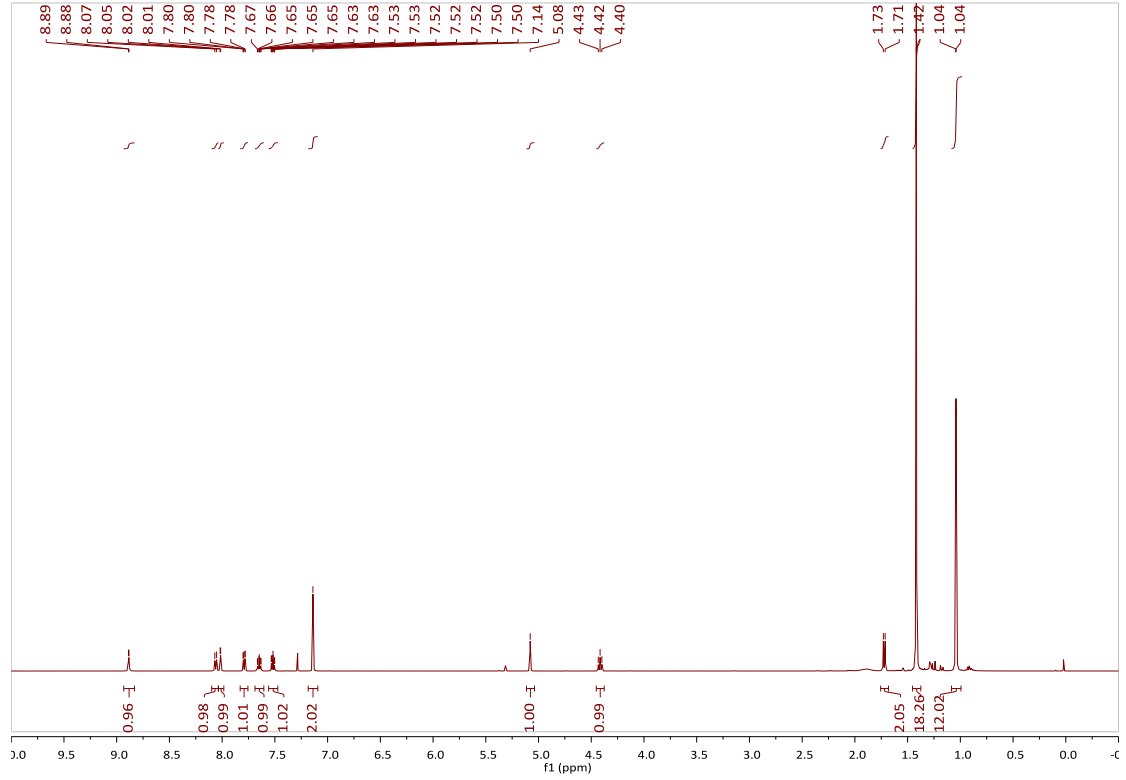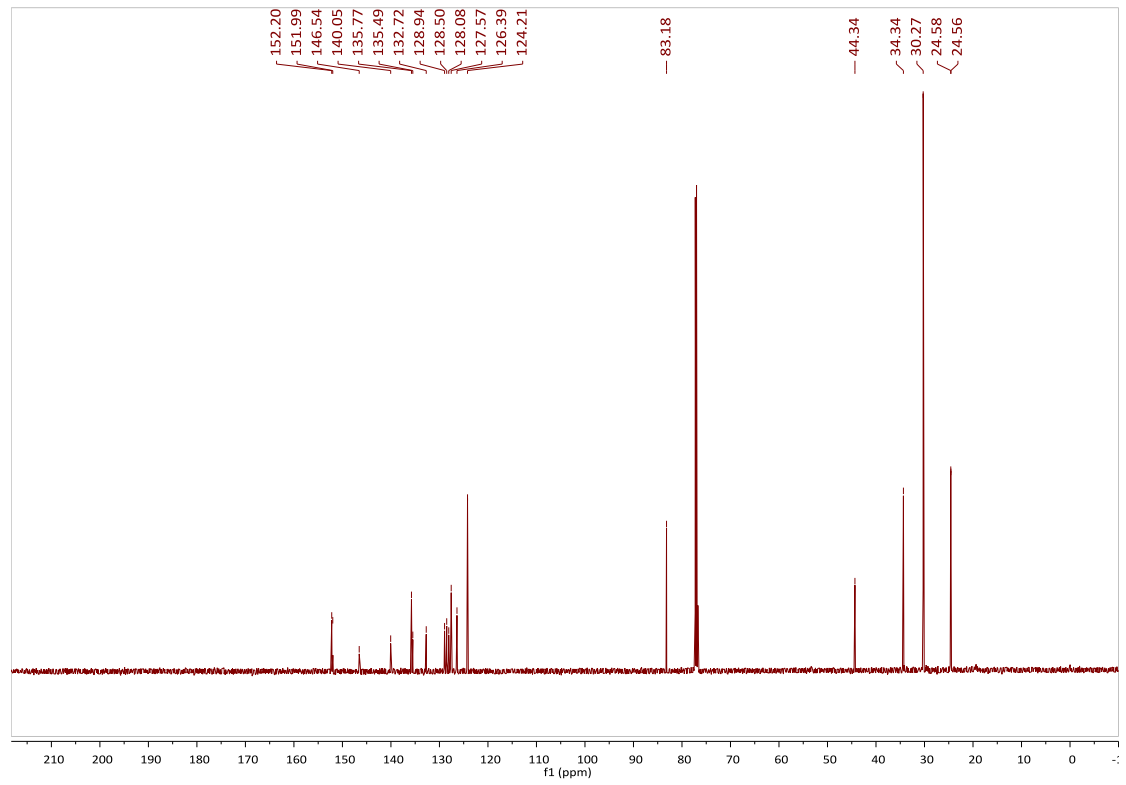

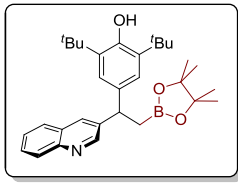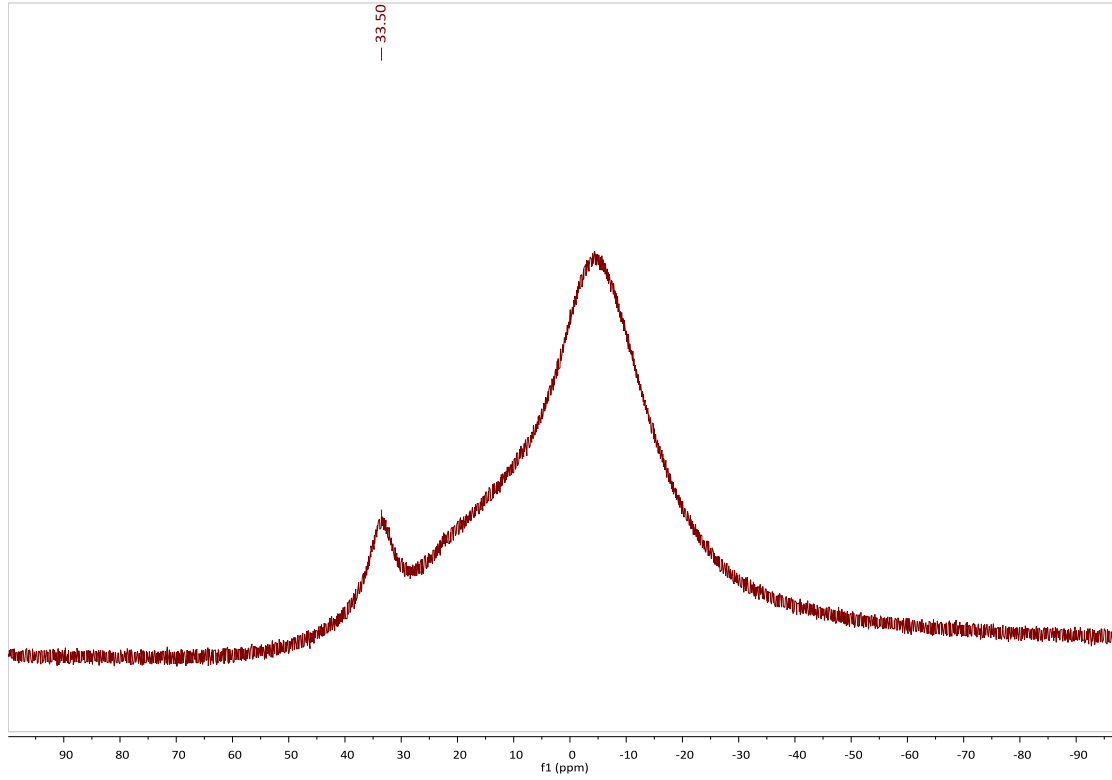

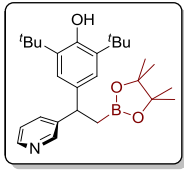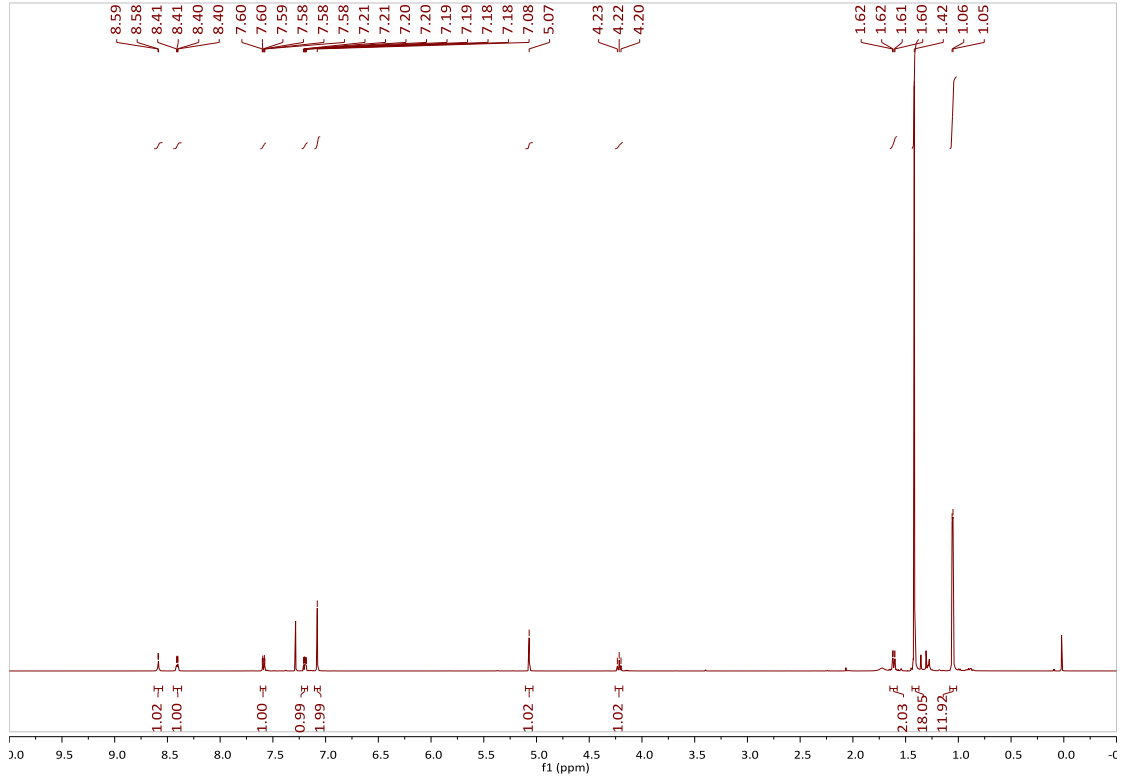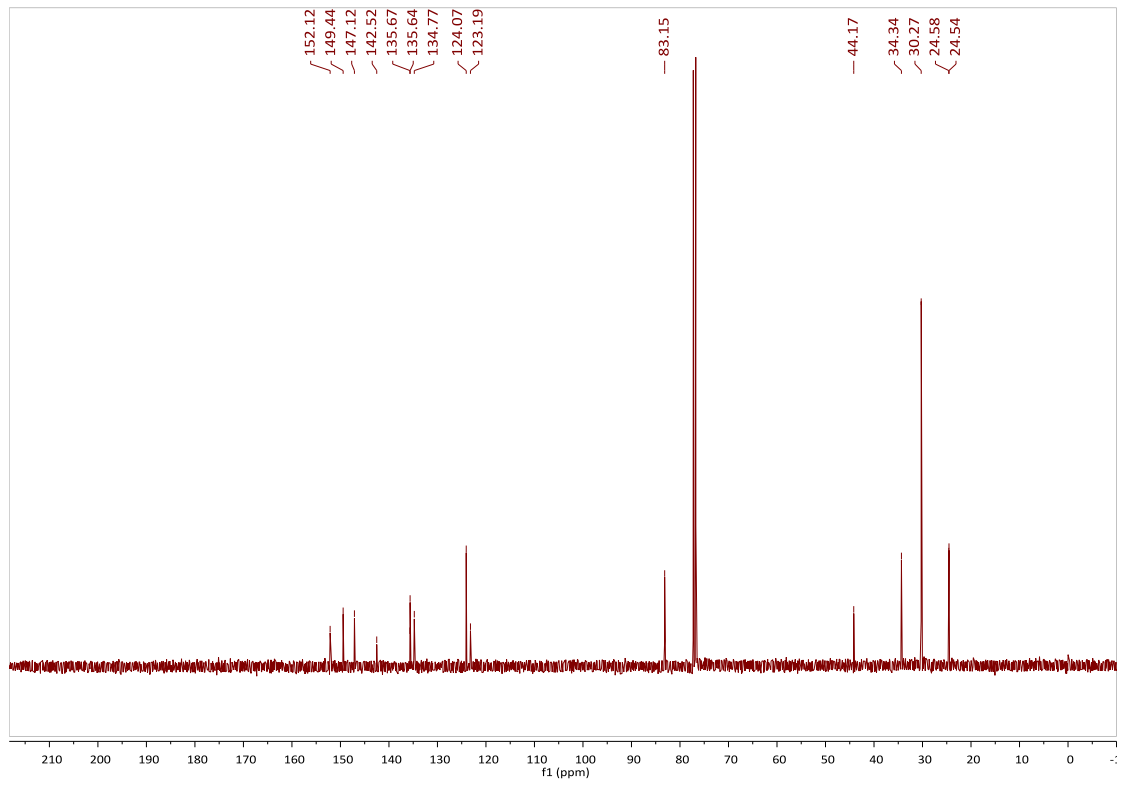

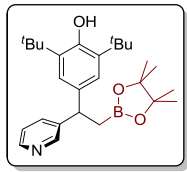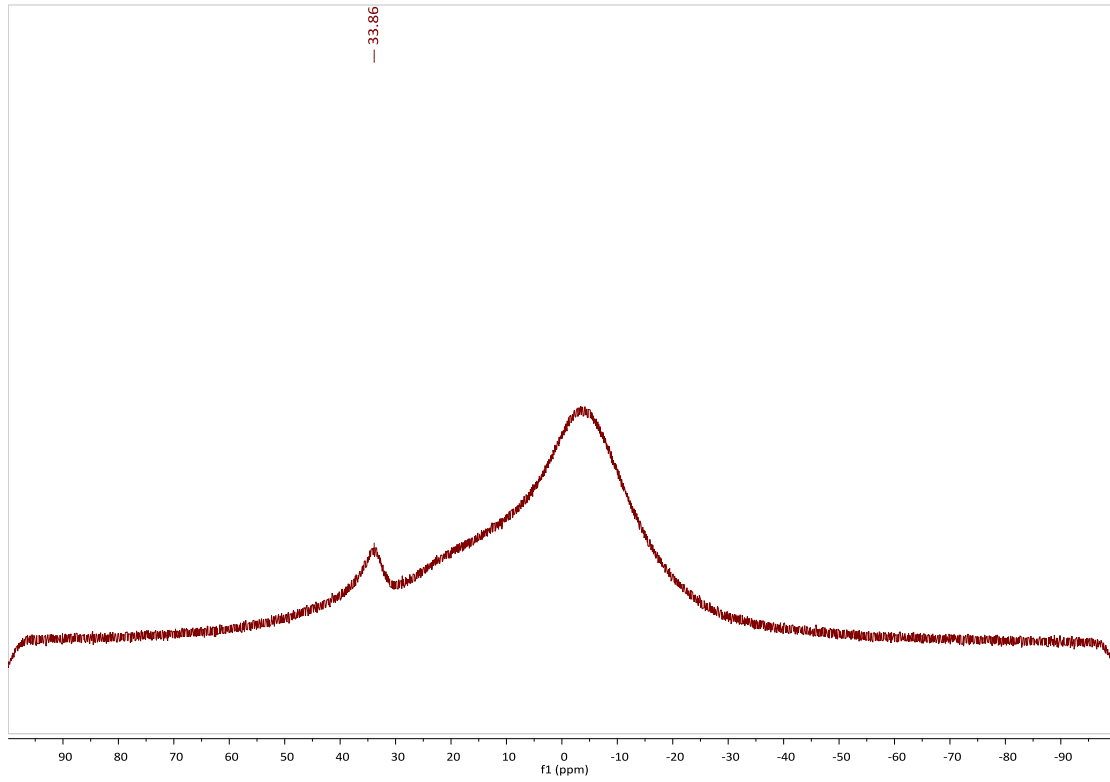

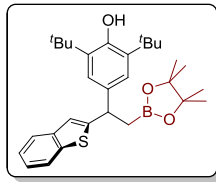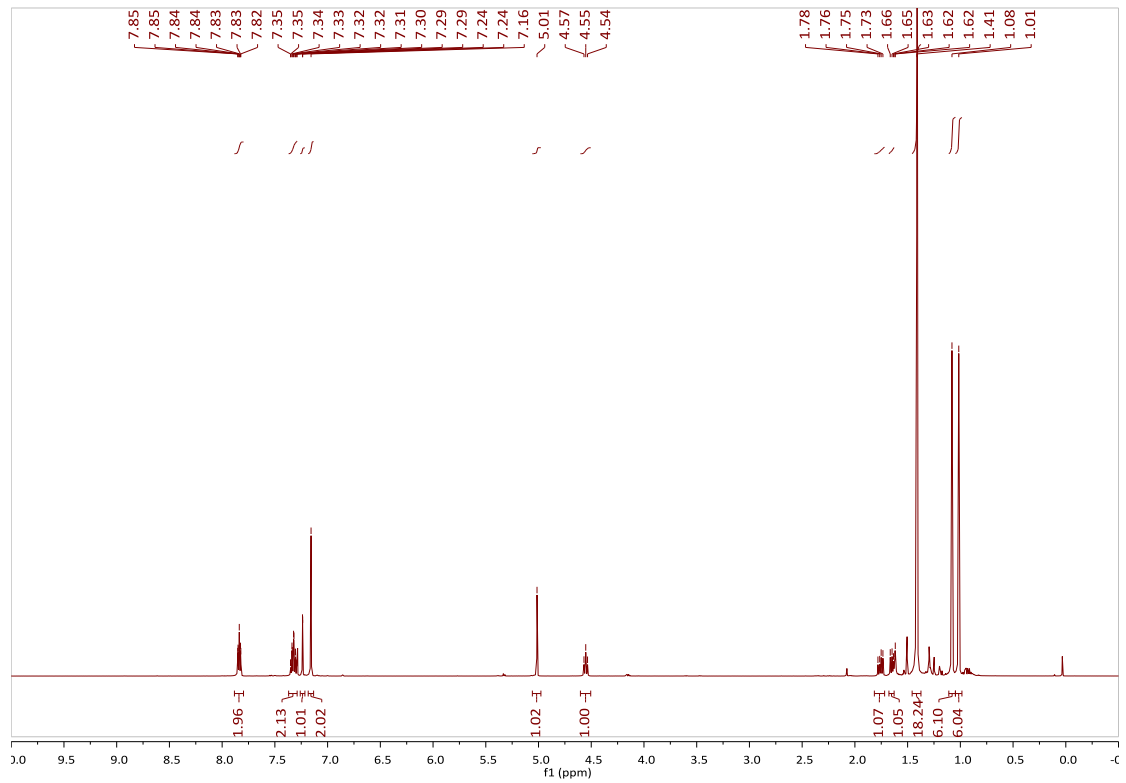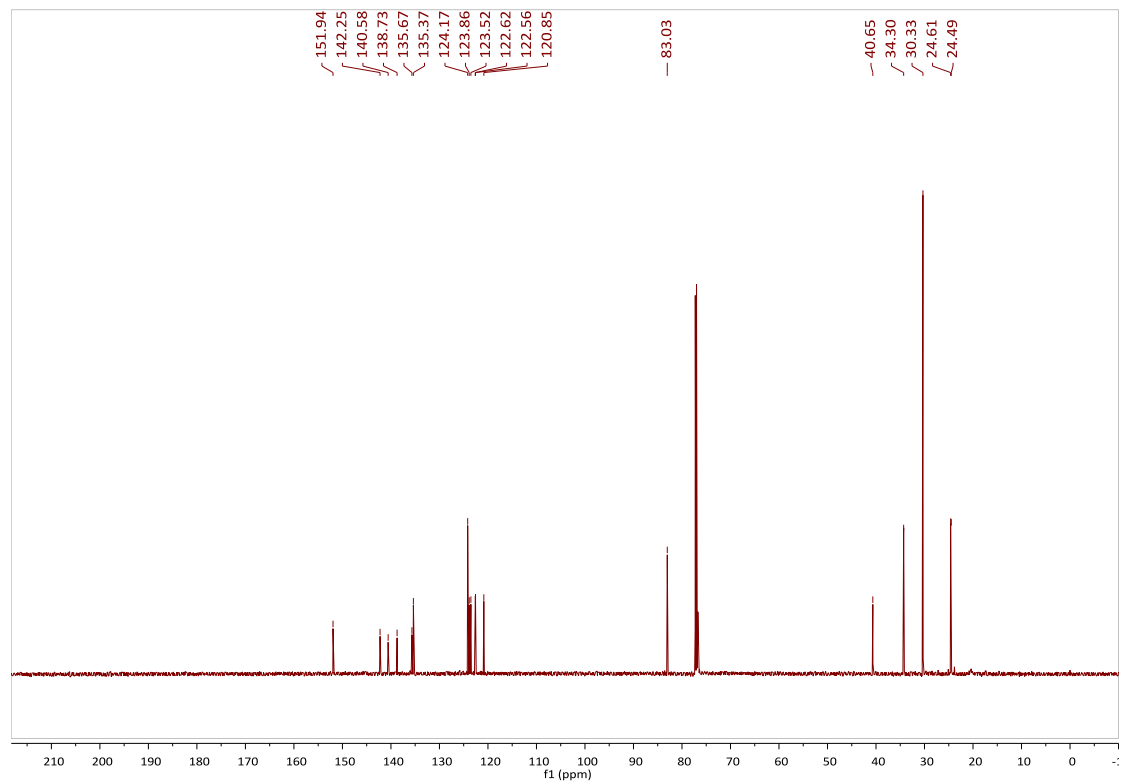

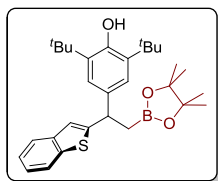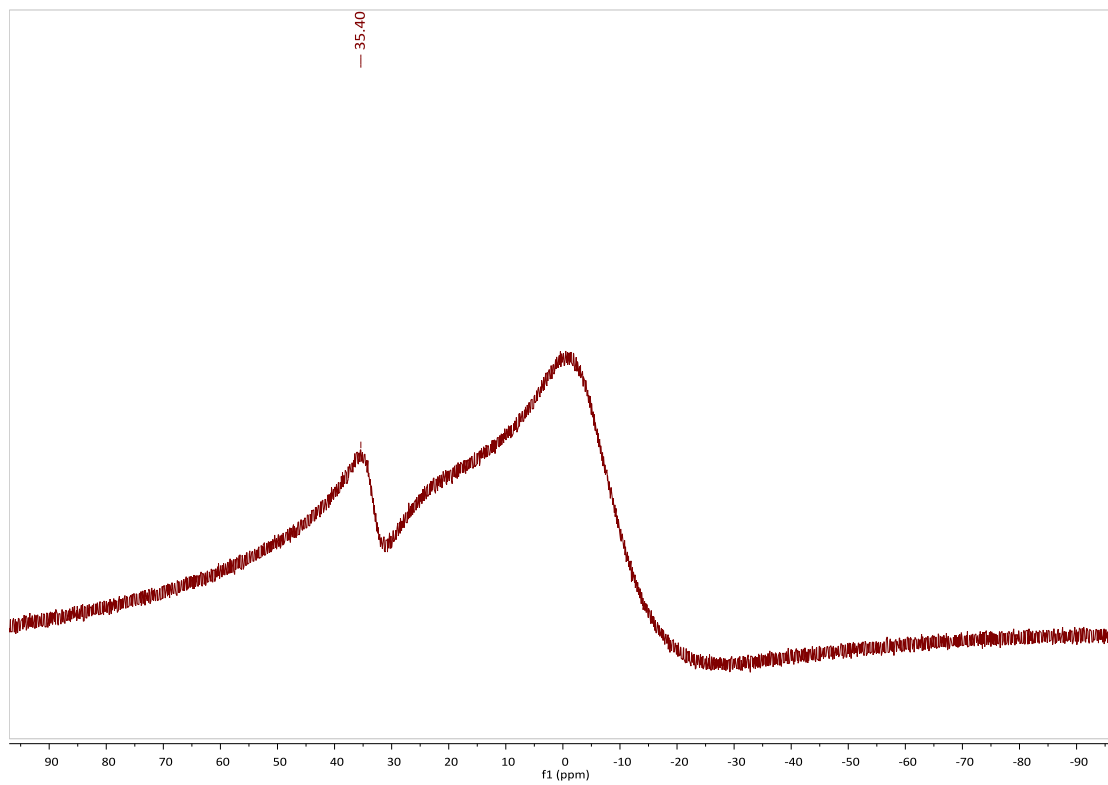



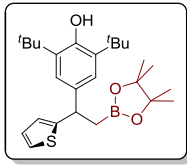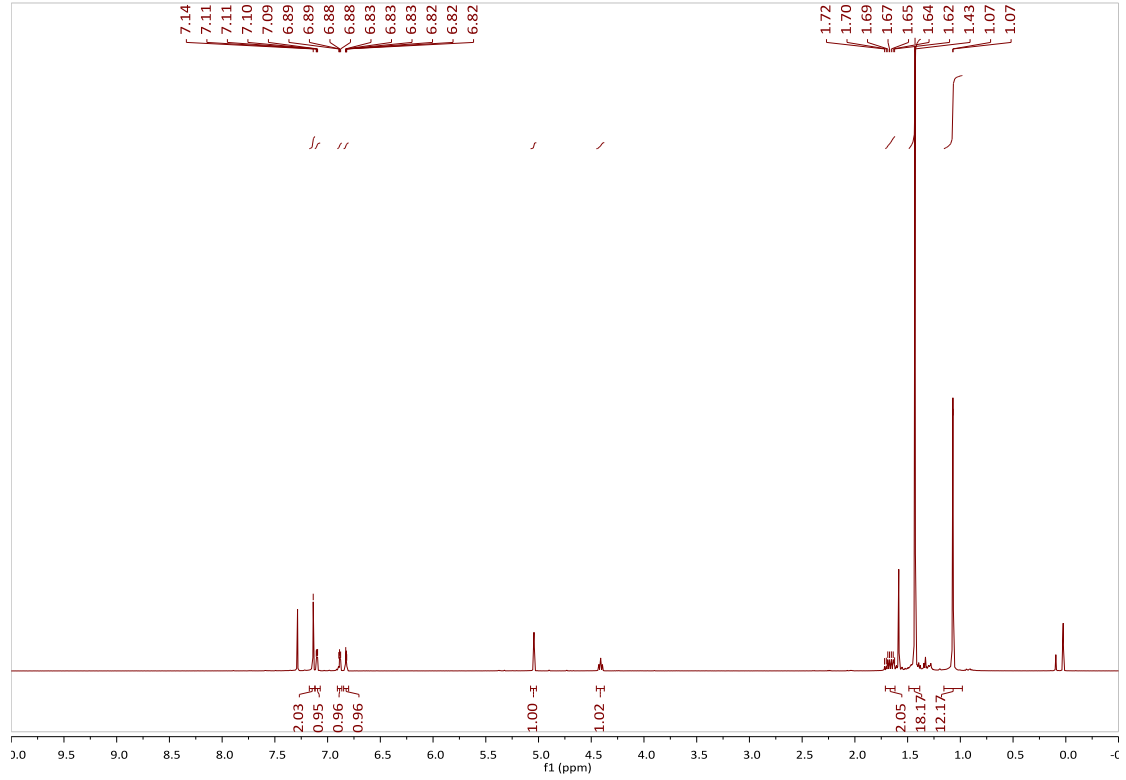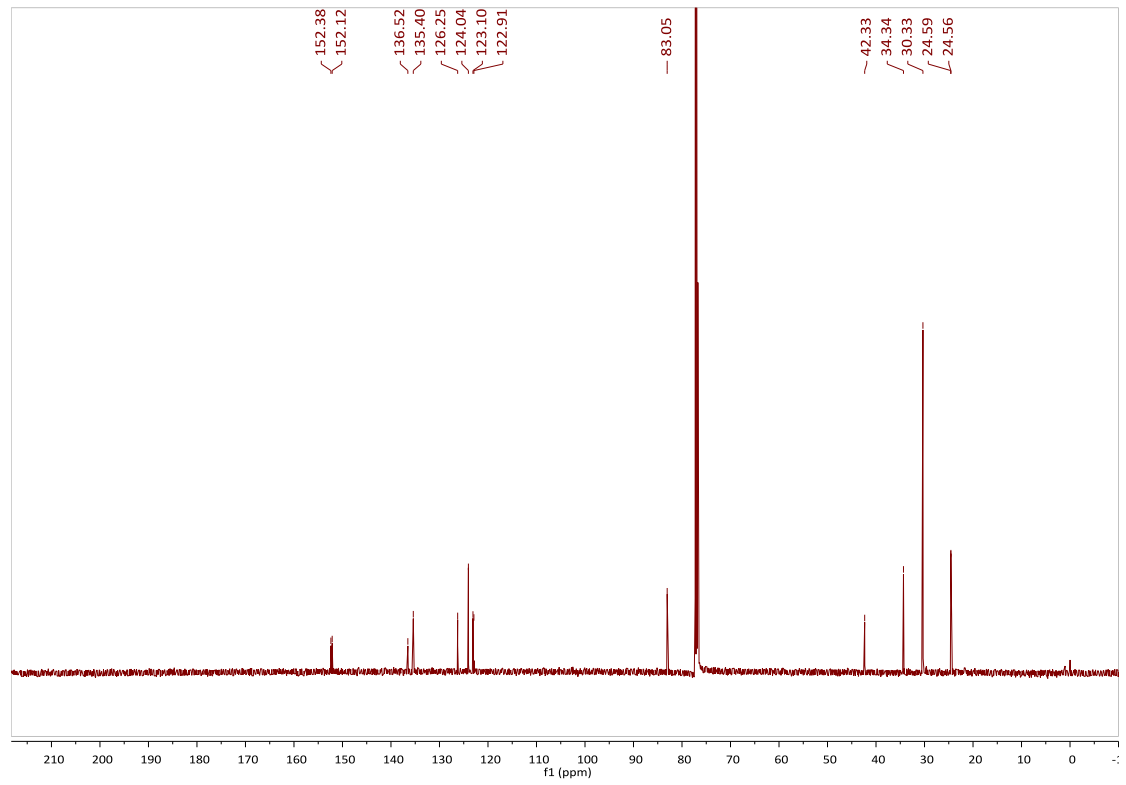

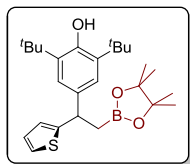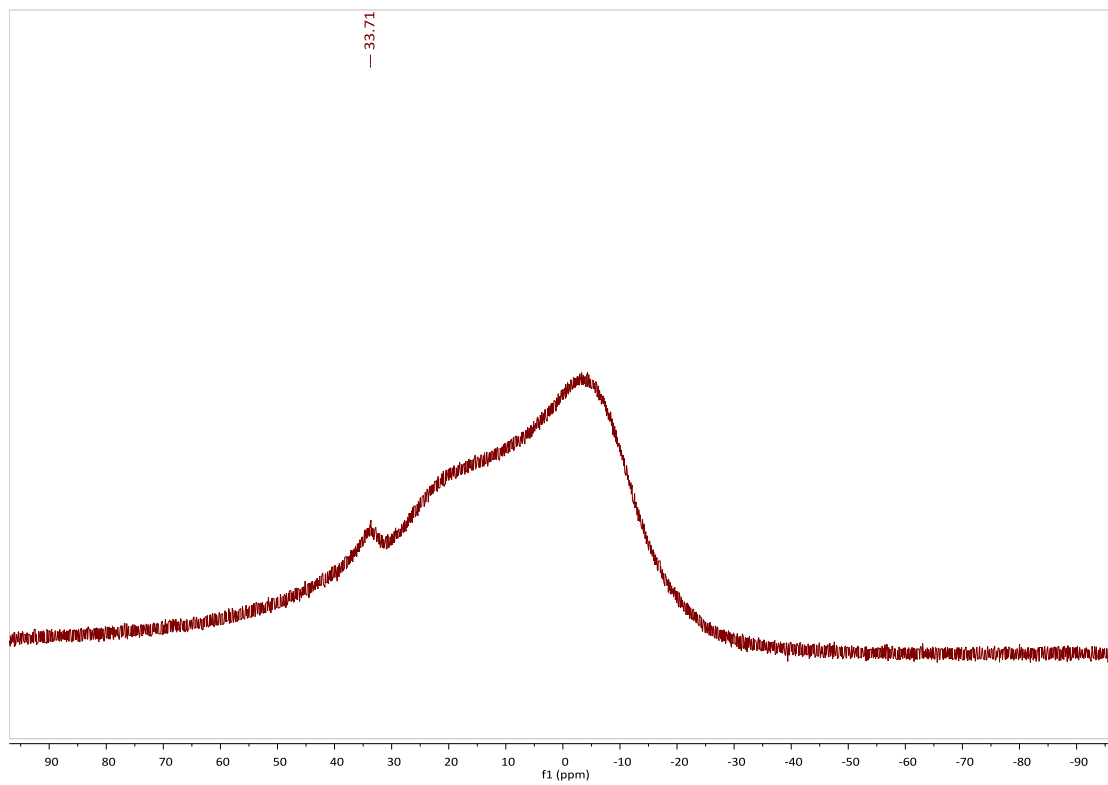

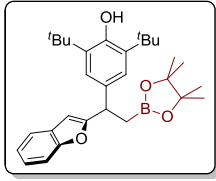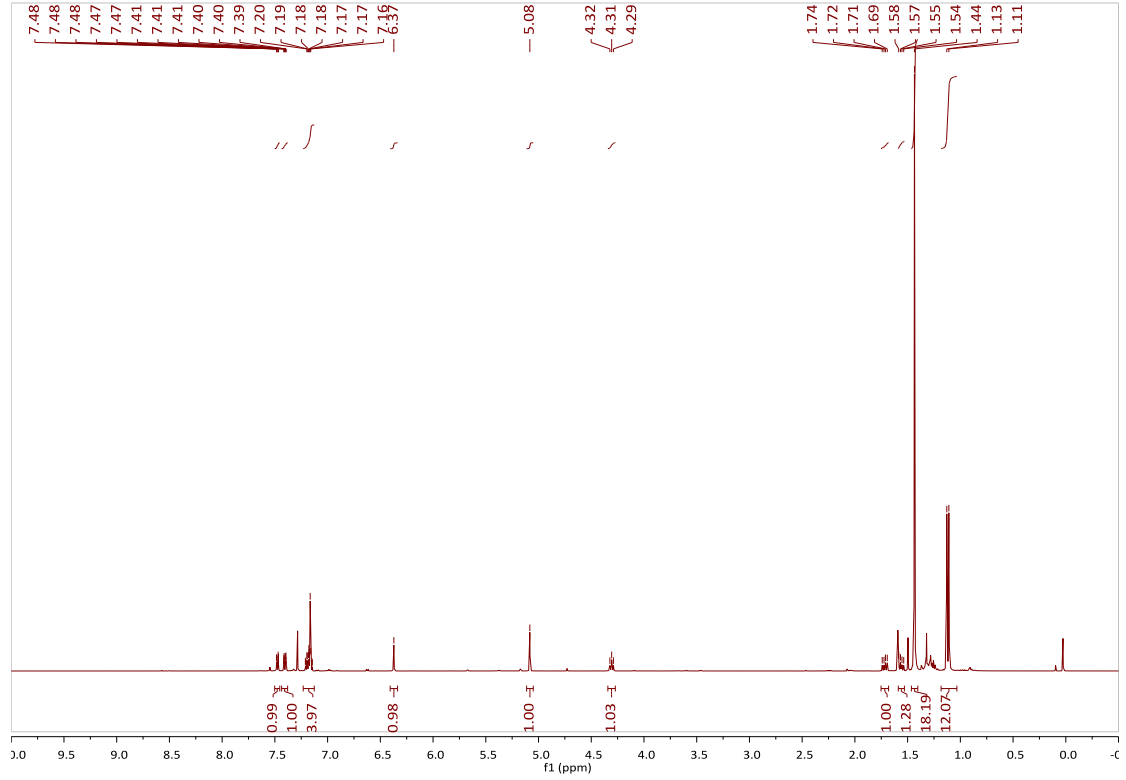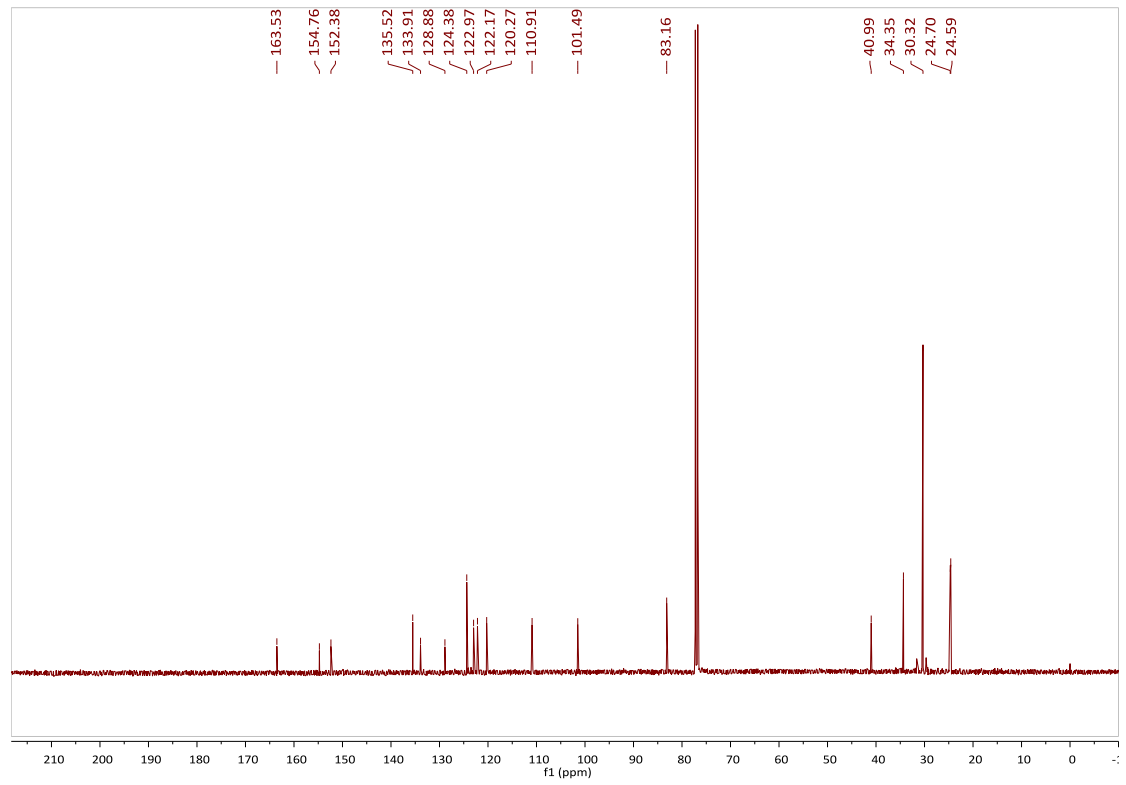

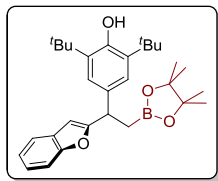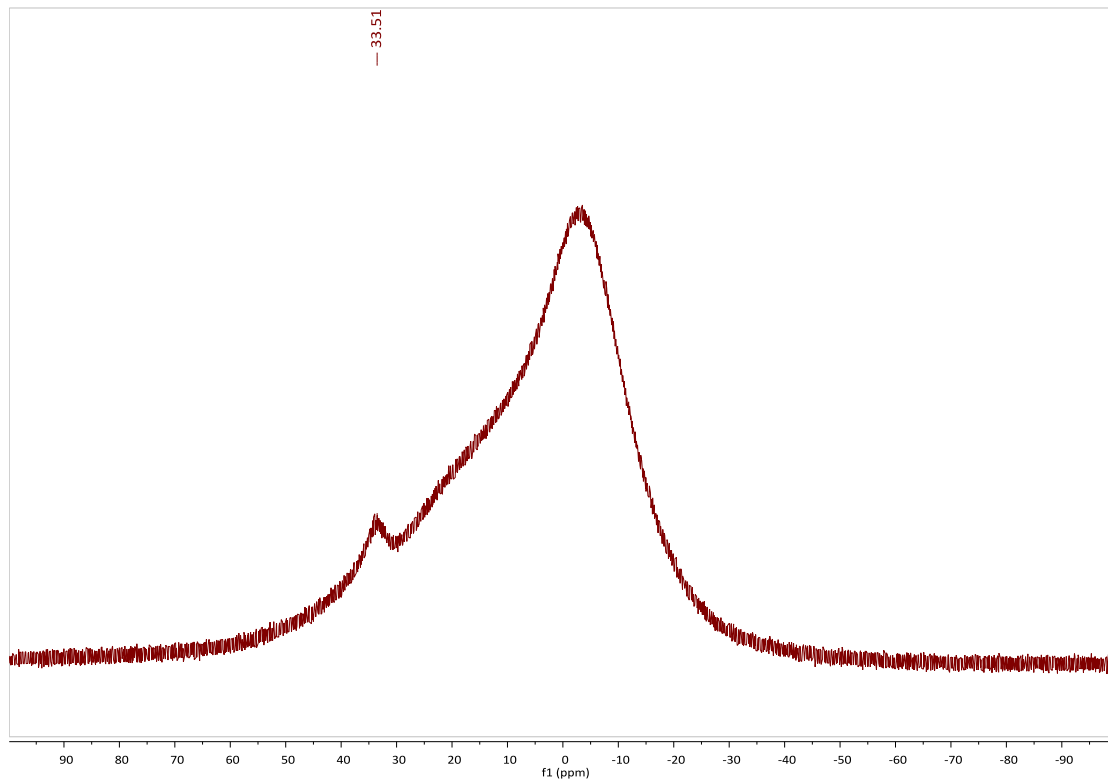

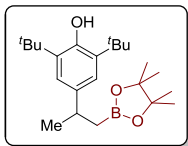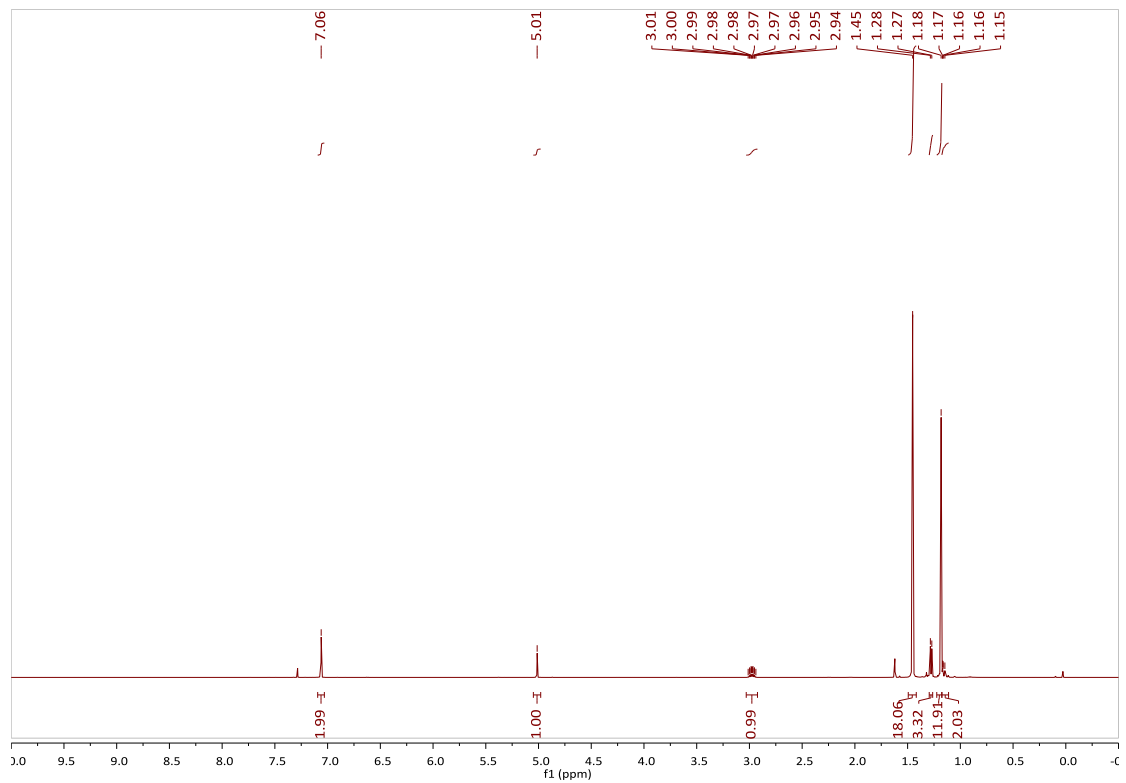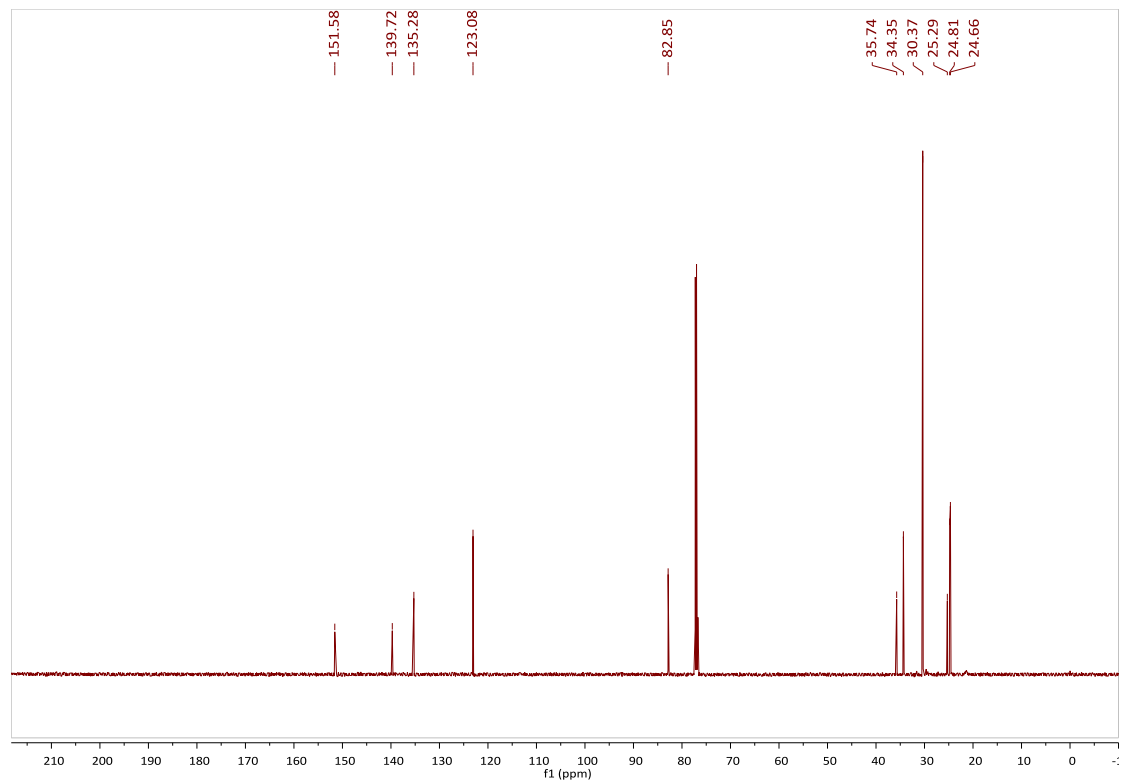

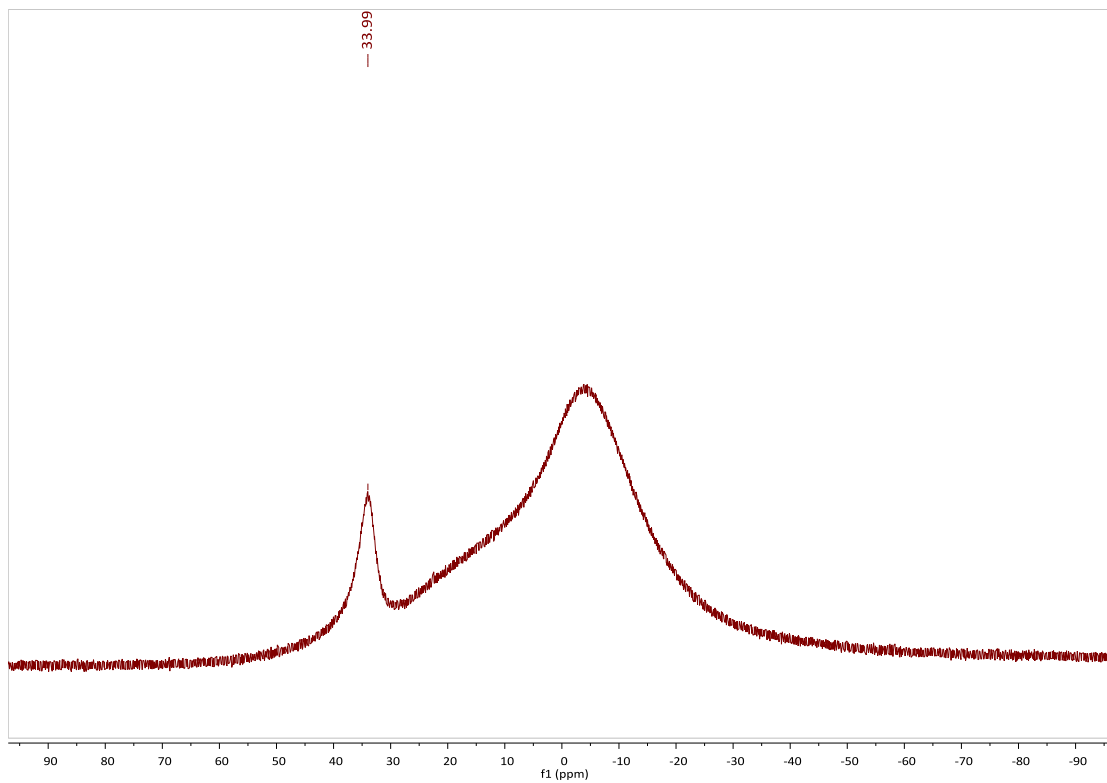

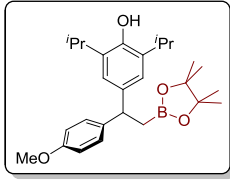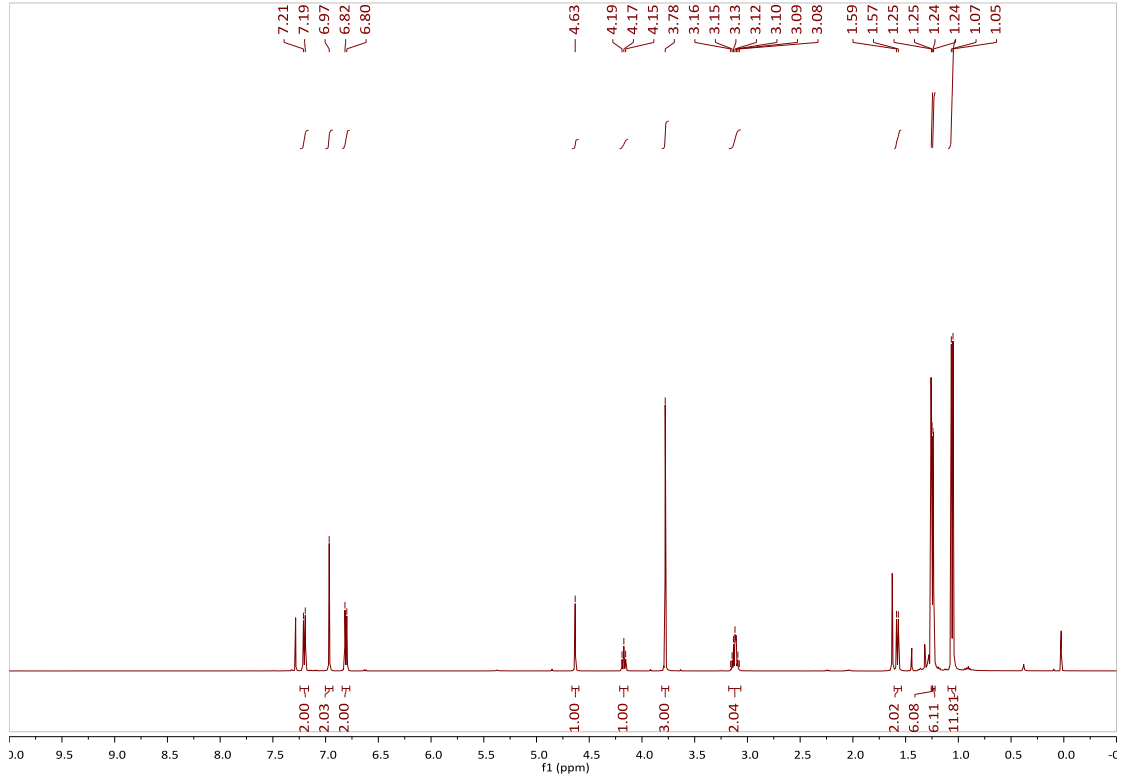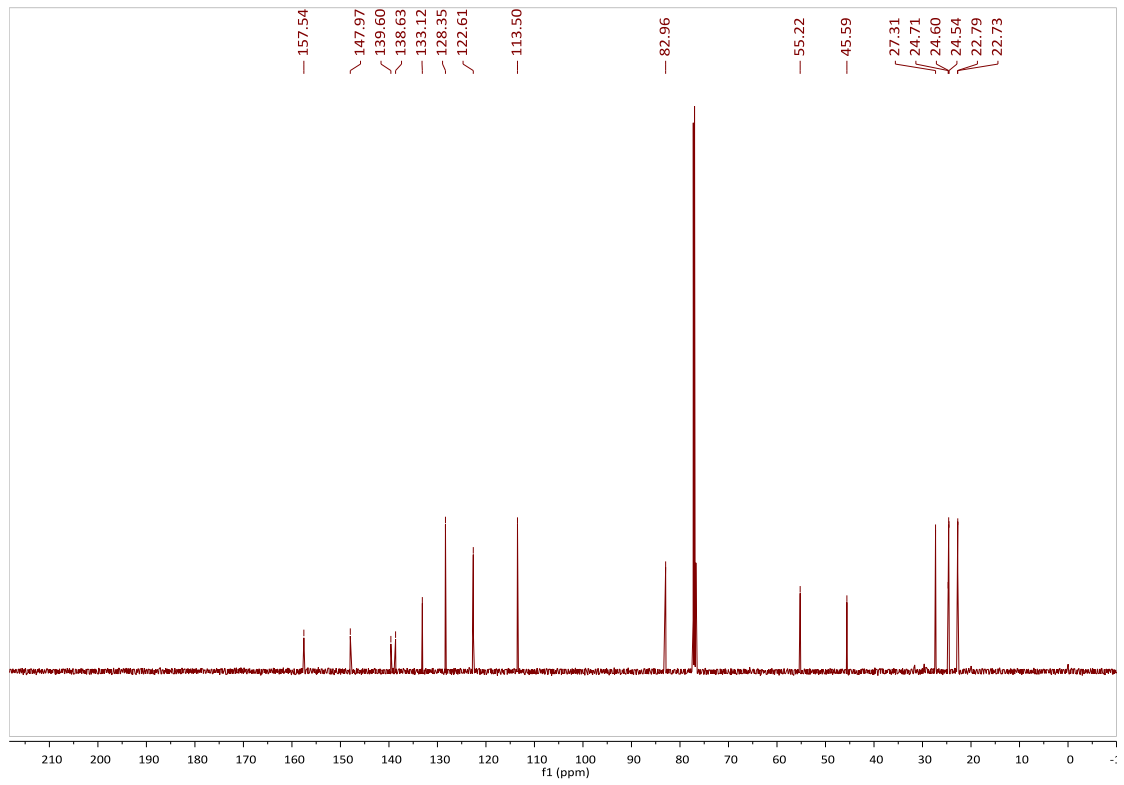

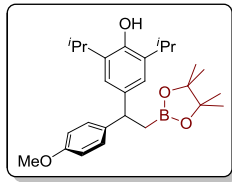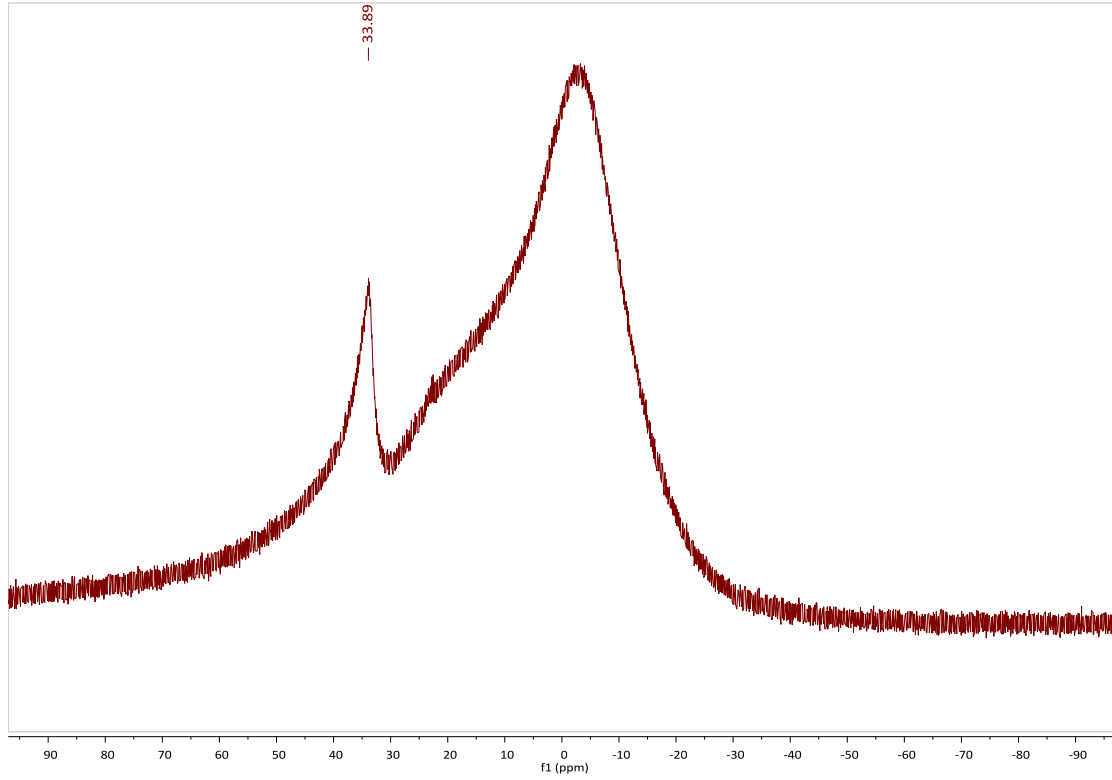



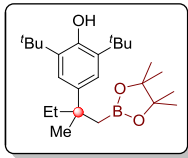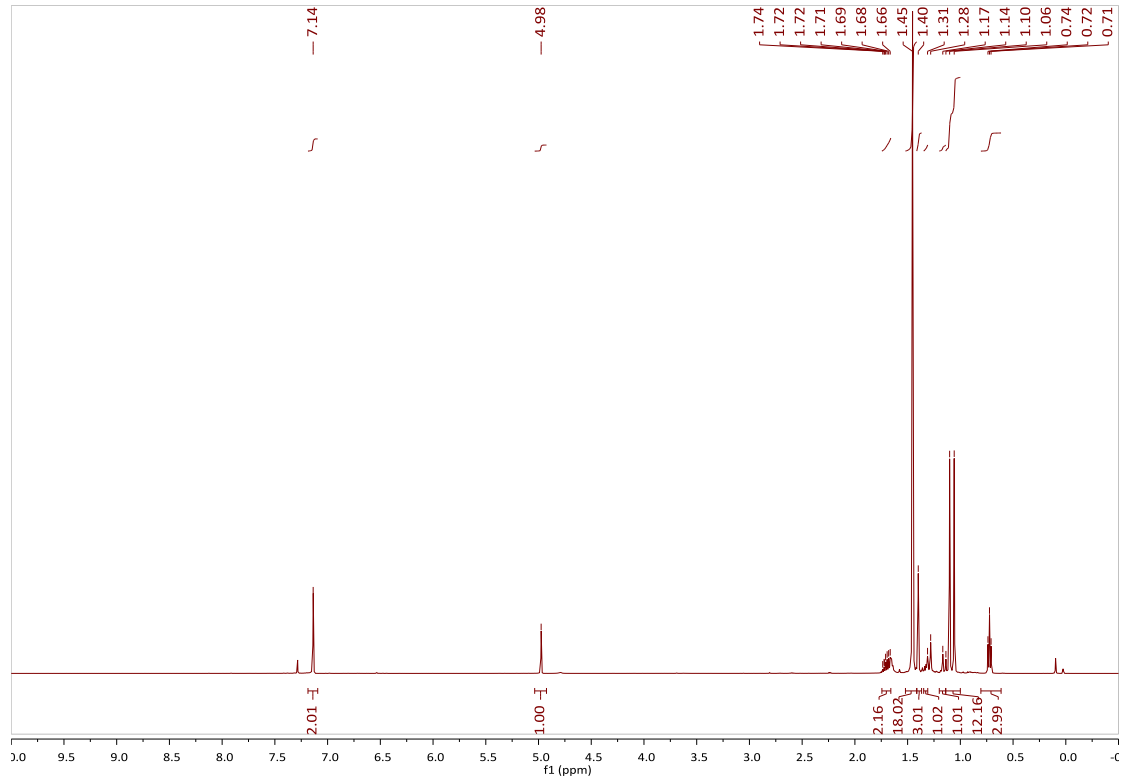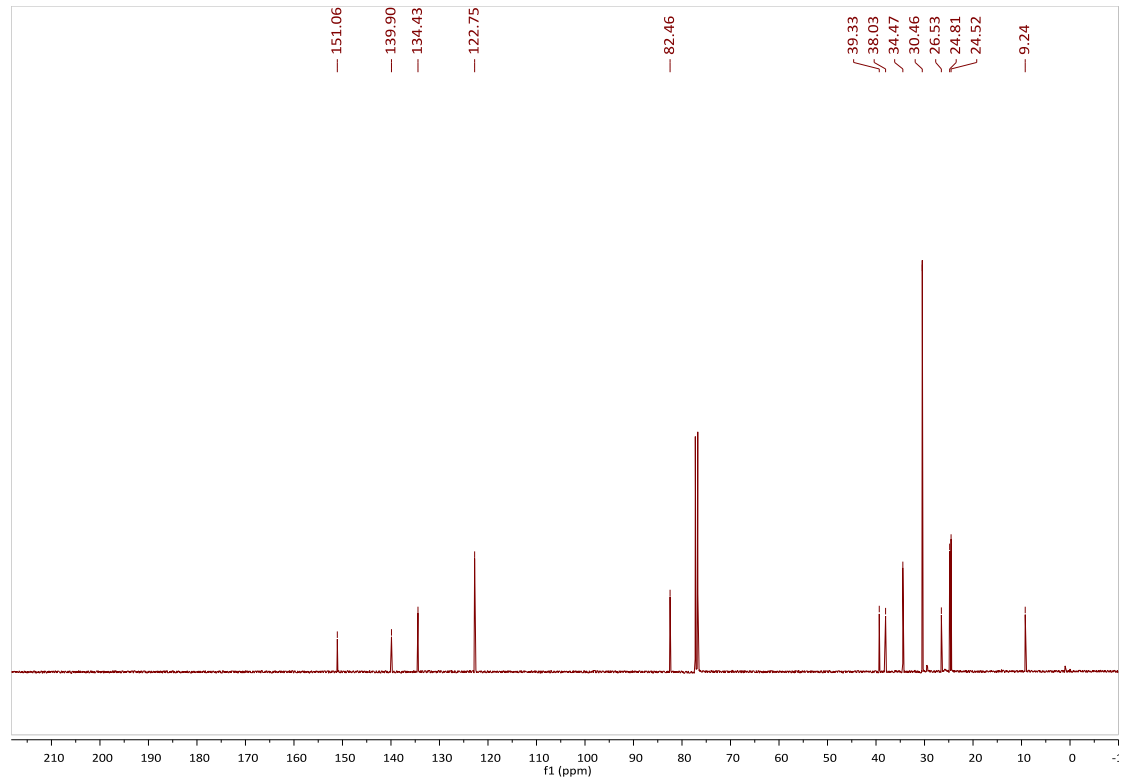

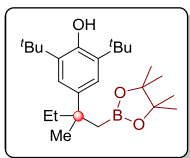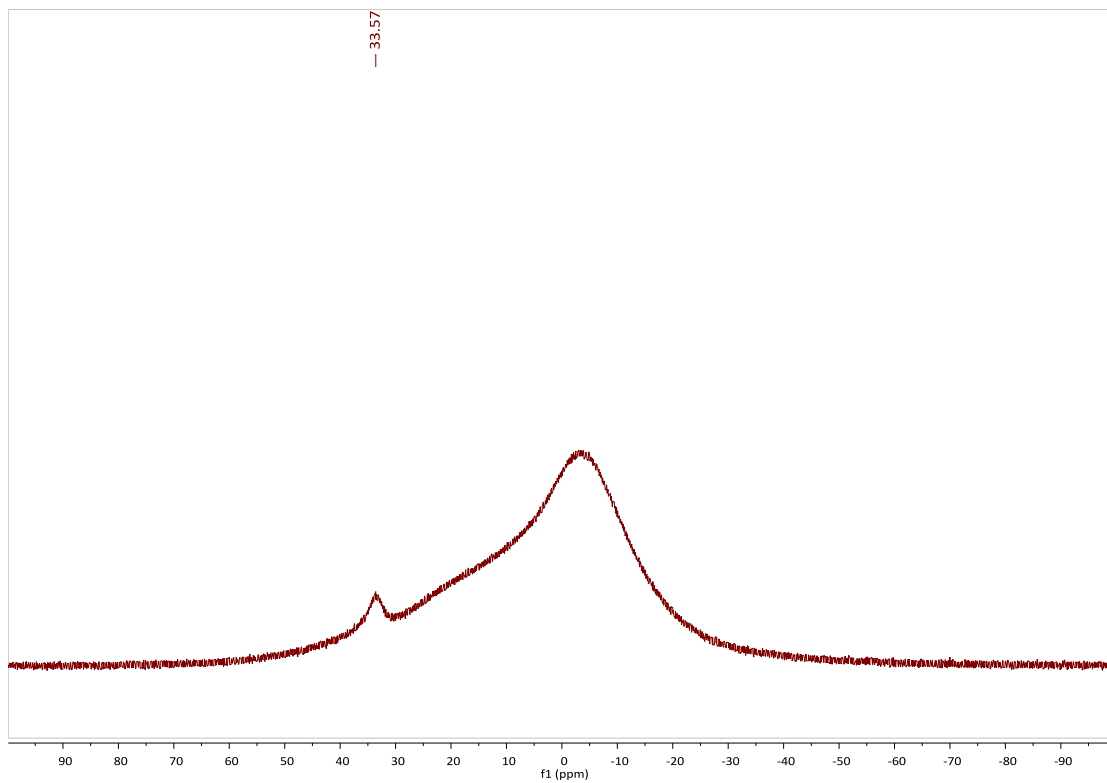

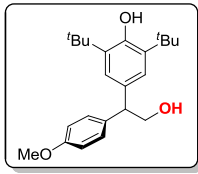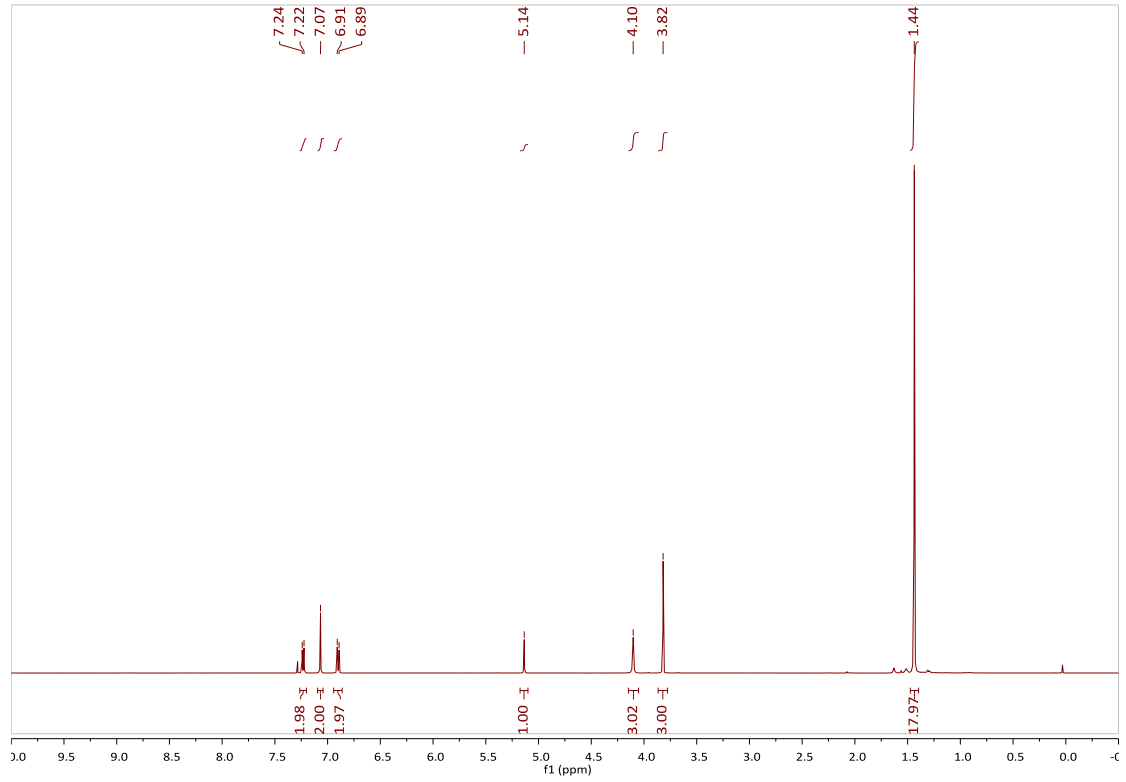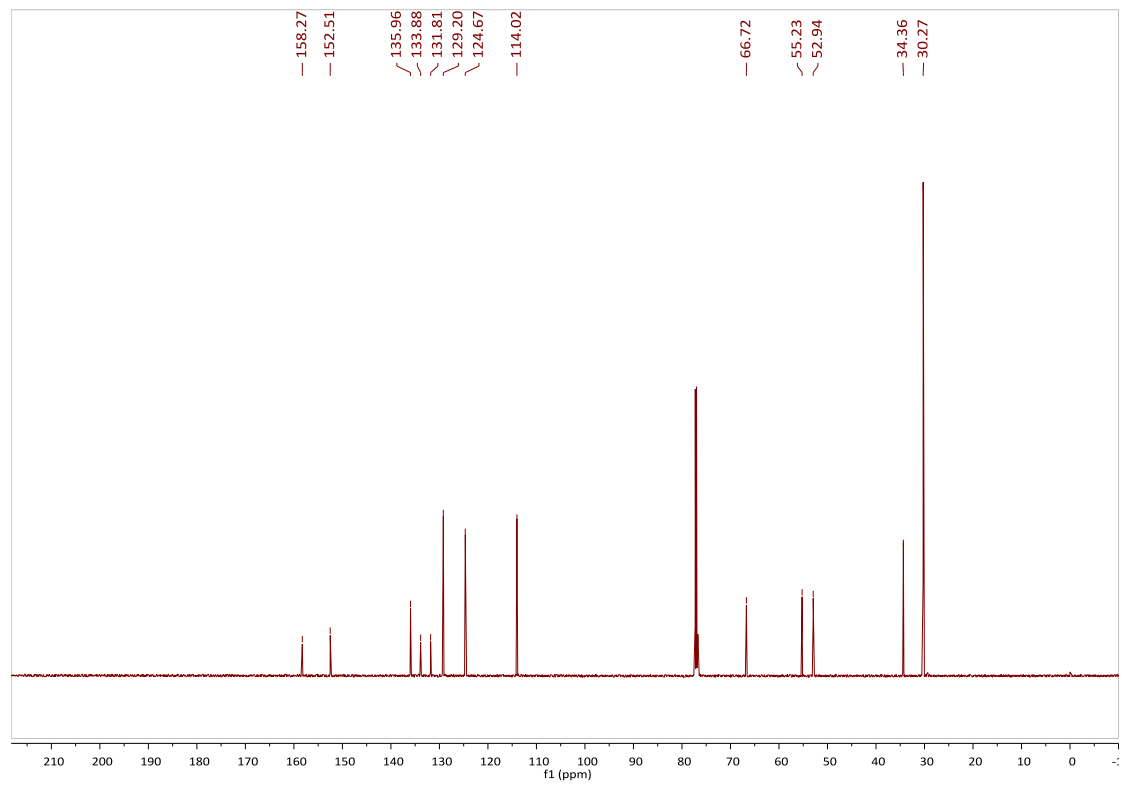

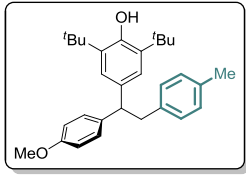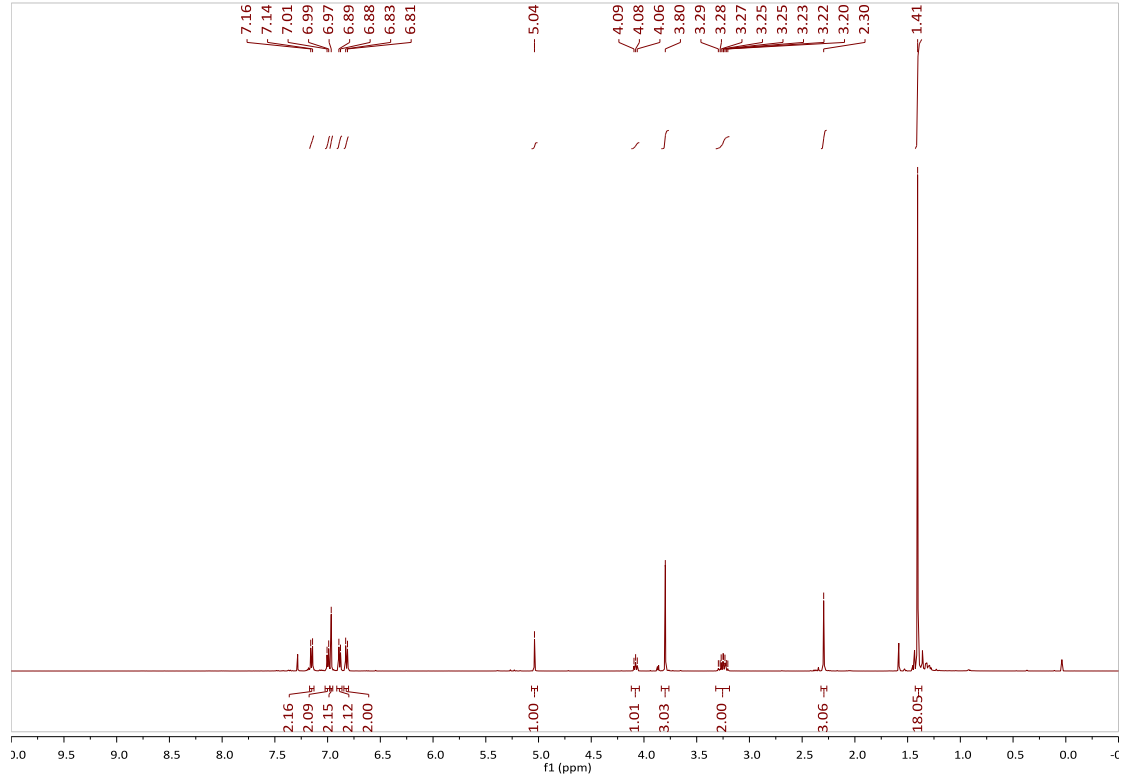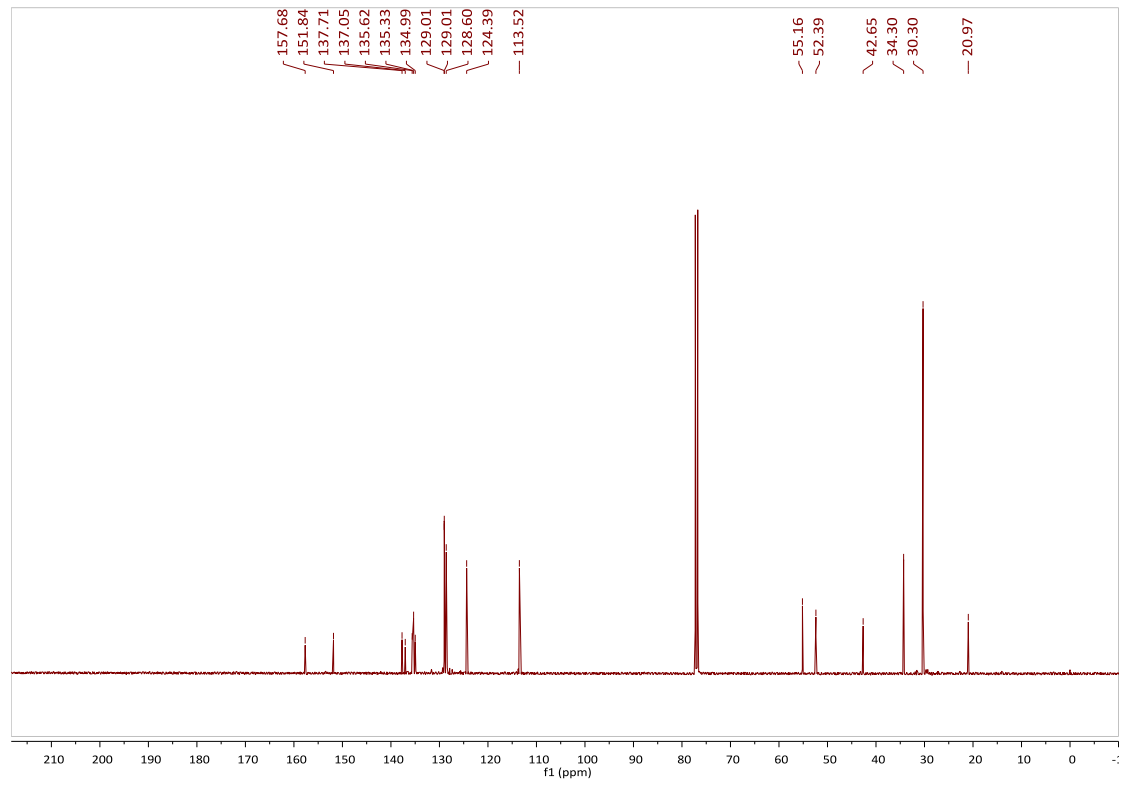

Supplement: d1qo00632k1.pdf [file d1qo00632k1.pdf]
